# Supplementary material for: C–H arylation of triphenylene, naphthalene and related arenes using Pd/C
Source: Royal Society of Chemistry journal article supplement (doi:10.1039/c4sc03051f), 2014-12-22
Supplement: c4sc03051f1.pdf [file c4sc03051f1.pdf]

# **C–H Arylation of Triphenylene, Naphthalene and Other Arenes using Pd/C**

Karl D. Collins, Roman Honeker,<sup>‡</sup> Suhelen Vásquez-Céspedes,<sup>‡</sup> Dan-Tam D. Tang,  
and Frank Glorius\*

Westfälische Wilhelms-Universität Münster, Organisch-Chemisches Institut, Corrensstraße 40, 48149,  
Münster, Germany

|                                                                   |           |
|-------------------------------------------------------------------|-----------|
| <b>1.0 GENERAL EXPERIMENTAL</b>                                   | <b>3</b>  |
| <b>2.0 SUBSTRATE SYNTHESIS</b>                                    | <b>5</b>  |
| 2.1 Preparation of Iodonium Salts                                 | 5         |
| <b>3.0 EXPERIMENTAL AND CHARACTERIZATION OF REACTION PRODUCTS</b> | <b>12</b> |
| 3.1 Arylation of Naphthalene: General procedure A                 | 12        |
| 3.2 Arylation of triphenylene: General procedure B                | 17        |
| 3.3 Arylation of other PAHs                                       | 22        |
| <b>4.0 REACTION OPTIMIZATION DATA</b>                             | <b>30</b> |
| 4.1 Solvent Screen                                                | 30        |
| 4.2 Naphthalene Optimization                                      | 31        |
| 4.3 Triphenylene Optimization                                     | 31        |
| <b>5.0 ADDITIVE SCREEN</b>                                        | <b>32</b> |
| <b>6.0 SCREENING OF CATALYSTS</b>                                 | <b>25</b> |
| 6.1 Naphthalene                                                   | 25        |
| 6.2 Triphenylene                                                  | 26        |
| 6.3 Discussion                                                    | 26        |
| <b>7.0 MECHANISTIC INVESTIGATION</b>                              | <b>28</b> |
| 7.1 Control reactions                                             | 28        |
|                                                                   | S1        |

|                                                                            |           |
|----------------------------------------------------------------------------|-----------|
| <b>7.2 Heterogeneity Tests</b>                                             | <b>28</b> |
| 7.2.1 Naphthalene                                                          | 28        |
| Hg(0) poisoning test                                                       | 28        |
| Hot filtration test                                                        | 29        |
| 3-Phase tests                                                              | 30        |
| 7.2.2 Triphenylene                                                         | 33        |
| <b>7.3 Kinetic experiments</b>                                             | <b>33</b> |
| 7.3.1 Kinetic Profile                                                      | 33        |
| 7.3.2 Kinetic profile with preactivation of catalyst                       | 34        |
| 7.3.3 Pd(OAc) <sub>2</sub> induction period                                | 35        |
| 7.3.4 Determination of KIE                                                 | 36        |
| 7.3.5 Competition experiment                                               | 37        |
| <b>7.4 Reaction Orders</b>                                                 | <b>37</b> |
| 7.4.1 Order in palladium                                                   | 37        |
| 7.4.2 Order in naphthalene                                                 | 40        |
| <b>7.5 Reaction of PhI<sub>2</sub>BF<sub>4</sub> in the absence of PAH</b> | <b>41</b> |
| <b>7.6 Deuteration experiments</b>                                         | <b>41</b> |
| <b>8.0 FAILED OR UNSELECTIVE REACTIONS</b>                                 | <b>42</b> |
| <b>9.0 NMR SPECTRA</b>                                                     | <b>43</b> |
| <b>10. 0 REFERENCES</b>                                                    | <b>95</b> |
| <b>11.0 X-RAY DATA</b>                                                     | <b>96</b> |
| 11.1 1-Phenylanthracene (6a)                                               | 96        |
| 11.2 1-Phenyltriphenylene (5a)                                             | 97        |

## 1.0 General Experimental

Unless otherwise noted, all reactions were carried out in oven-dried glassware under an atmosphere of air. Catalysis reactions proceed equally well in air dried glassware. Reaction temperatures are reported as the temperature of the oil bath surrounding the vessel.

Dry solvents (<50 ppm H<sub>2</sub>O) were purchased from Acros Organics, Sigma-Aldrich or Carl Roth and stored over molecular sieves under argon atmosphere. Commercially available chemicals were obtained from Acros Organics, Sigma-Aldrich, Alfa Aesar, ABCR, TCI Europe, Combi-Blocks, Johnson-Matthey and Heraeus and used as received unless otherwise stated. The Pd/C catalysts used were of following types: Acros Organics: 10% Pd on activated carbon, unreduced; Sigma-Aldrich: 5% Pd on activated charcoal; Johnson-Matthey: 5% Pd on activated carbon paste type 39, 58.5% H<sub>2</sub>O; 5% Pd on activated carbon paste type 58, 48.0% H<sub>2</sub>O; 5% Pd on activated carbon paste type 452, 59.1% H<sub>2</sub>O; 5% Pd on activated carbon paste type 478, 52.1% H<sub>2</sub>O; **Heraeus: 5 wt% Pd/C type K-0219, <3% H<sub>2</sub>O (standard catalyst for this study)**. Except for Pd/C from Heraeus, all catalysts were dried under vacuum over P<sub>2</sub>O<sub>5</sub> (replace by fresh P<sub>2</sub>O<sub>5</sub> after 4 h) for ~16 h. Dried catalysts were then stored in a glove box, for convenience rather than necessity. **NOTE:** For the catalysis reactions reported herein the catalysts could be stored and used under air.

Analytical thin layer chromatography (TLC) was performed on silica gel 60 F<sub>254</sub> aluminum plates (Merck). TLC plates were visualized by exposure to short wave ultraviolet light (254 nm, 366 nm). Flash column chromatography was performed on Merck silica gel (40-63 mesh). <sup>1</sup>H-, <sup>13</sup>C- and <sup>19</sup>F-NMR spectra were recorded at room temperature on a Bruker AV 300 or AV 400 and Agilent 600 (DD2). Chemical shifts ( $\delta$ ) are given in ppm. The residual solvent signals were used as references and the chemical shifts converted to the TMS scale (CDCl<sub>3</sub>:  $\delta_{\text{H}}$  = 7.26 ppm,  $\delta_{\text{C}}$  = 77.16 ppm; DMSO-d<sub>6</sub>:  $\delta_{\text{H}}$  = 2.50 ppm,  $\delta_{\text{C}}$  = 39.52 ppm). <sup>19</sup>F-NMR spectra are not calibrated and  $\delta$  (ppm) is given relative to CCl<sub>3</sub>F. Coupling constants ( $J$ ) are quoted in Hz. GC-MS spectra were recorded on an Agilent Technologies 7890A GC-system with an Agilent 5975C VL MSD or an Agilent 5975 inert Mass Selective Detector (EI) and a HP-5MS column (0.25 mm  $\times$  30 m, film: 0.25  $\mu$ m). The major signals are quoted in  $m/z$  with the relative intensity in parentheses. The methods used start with the injection temperature  $T_0$ . After holding this temperature for 3 min, the column is heated to temperature  $T_1$  (ramp) and this temperature is held for an additional time  $t$  (method 50\_40:

$T_0 = 50\text{ }^{\circ}\text{C}$ ,  $T_1 = 290\text{ }^{\circ}\text{C}$ , ramp =  $40\text{ }^{\circ}\text{C}/\text{min}$ ,  $t = 10\text{ min}$ ). Exact ESI mass spectra were recorded on a Bruker Daltonics MicroTof. High resolution ESI mass spectra were recorded on a Thermo-Fisher Scientific Orbitrap LTQ XL. Exact EI mass spectra were recorded on a Waters-Micromass GC-Tof. Major signals are quoted in  $m/z$ . Infrared spectra were recorded neat on a Shimadzu FTIR-8400S. The wave numbers ( $\nu$ ) of recorded IR-signals are quoted in  $\text{cm}^{-1}$ .

## 2.0 Substrate Synthesis

### 2.1 Preparation of Iodonium Salts

#### Diphenyliodonium tetrafluoroborate

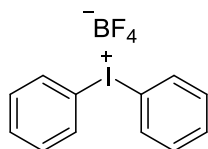

Diphenyliodonium tetrafluoroborate was synthesised according to the procedure of Bielawski *et al.*<sup>1</sup> Reaction of iodobenzene (5.56 g, 3.00 mL, 27.3 mmol, 1 eq) and phenylboronic acid (3.66 g, 30.0 mmol, 1.1 eq) gave the target compound (8.84 g, 24.0 mmol, 88%) as a white solid.

<sup>1</sup>H-NMR (300 MHz, DMSO-d<sub>6</sub>):  $\delta$  7.53 (t,  $J$  = 7.7 Hz, 4H, 4  $\times$  ArH), 7.70-7.63 (m, 2H, 2  $\times$  ArH), 8.25 (dd,  $J$  = 8.4, 1.2 Hz, 4H, 4  $\times$  ArH); <sup>13</sup>C-NMR (75 MHz, DMSO-d<sub>6</sub>):  $\delta$  116.5, 131.8, 132.1, 135.2; <sup>19</sup>F-NMR (282 MHz, DMSO-d<sub>6</sub>):  $\delta$  -148.23 (m), -148.17 (bs).

Data is in accordance with the literature.<sup>1</sup>

#### Bis(2-fluorophenyl)iodonium tetrafluoroborate

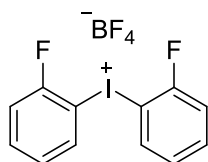

Bis(2-fluorophenyl)iodonium tetrafluoroborate was synthesised according to the procedure of Bielawski *et al.*<sup>1</sup> Reaction of 2-fluoro-1-iodobenzene (761 mg, 0.40 mL, 3.43 mmol, 1 eq) and 2-fluorophenylboronic acid (531 mg, 3.80 mmol, 1.1 eq) gave the target compound (1.15 g, 2.85 mmol, 83%) as a white solid.

<sup>1</sup>H-NMR (300 MHz, DMSO-d<sub>6</sub>):  $\delta$  7.38 (td,  $J$  = 7.7, 1.4 Hz, 2H, 2  $\times$  ArH), 7.53-7.65 (m, 2H, 2  $\times$  ArH), 7.67-7.79 (m, 2H, 2  $\times$  ArH), 8.36-8.48 (m, 2H, 2  $\times$  ArH); <sup>13</sup>C-NMR (75 MHz, DMSO-d<sub>6</sub>): 104.1 (d,  $J$  = 25.2 Hz), 117.0 (d,  $J$  = 22.2 Hz), 127.8, 135.9 (d,  $J$  = 7.9 Hz), 137.1, 159.1 (d,  $J$  = 249.9 Hz); <sup>19</sup>F{<sup>1</sup>H}-NMR (282 MHz, DMSO-d<sub>6</sub>): -148.2 (m), -148.1 (bs), -97.9 (s).

Data is in accordance with the literature.<sup>1</sup>

### Bis(4-fluorophenyl)iodonium tetrafluoroborate

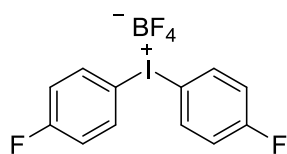

Bis(4-fluorophenyl)iodonium tetrafluoroborate was synthesised according to the procedure of Bielawski *et al.*<sup>1</sup> Reaction of 4-fluoro-1-iodobenzene (1.28 g, 0.67 mL, 5.75 mmol, 1 eq) and 4-fluorophenylboronic acid (885 mg, 6.32 mmol, 1.1 eq) gave the target compound (1.14 g, 2.82 mmol, 49%) as a white solid.

<sup>1</sup>H-NMR (300 MHz, DMSO-*d*<sub>6</sub>) δ 7.42 (d, *J* = 9.0 Hz, 4H, 4 × ArH), 8.32 (d, *J* = 9.0 Hz, 4H, 4 × ArH); <sup>13</sup>C NMR (75 MHz, DMSO-*d*<sub>6</sub>) δ 111.1, 119.2 (d, *J* = 22.8 Hz), 137.9 (d, *J* = 9.1 Hz), 163.9 (d, *J* = 251.6 Hz); <sup>19</sup>F NMR (282 MHz, DMSO-*d*<sub>6</sub>) δ -148.23 (d, *J* = 16.2 Hz), -106.61 (tt, *J* = 8.9, 5.1 Hz).

Data is in accordance with the literature.<sup>2</sup>

### Bis(3-nitrophenyl)iodonium tetrafluoroborate

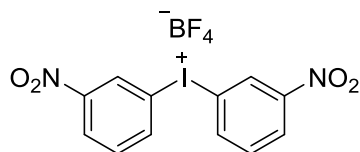

Bis(3-nitrophenyl)iodonium tetrafluoroborate was synthesised according to the procedure of Bielawski *et al.*<sup>1</sup> Reaction of 1-iodo-3-nitrobenzene (1.99 g, 8.00 mmol, 1 eq) and 3-nitrophenylboronic acid (1.47 g, 8.81 mmol, 1.1 eq) gave the target compound (932 mg, 2.04 mmol, 26%) as a brown solid. **Note:** 10 mL of acetonitrile were added as co-solvent after the oxidation step.

<sup>1</sup>H-NMR (400 MHz, DMSO-*d*<sub>6</sub>): δ (ppm): 7.84 (t, *J* = 8.2 Hz, 2H, 2 × ArH), 8.47 (d, *J* = 8.2 Hz, 2H, 2 × ArH), 8.74 (d, *J* = 8.2 Hz, 2H, 2 × ArH), 9.29 (s, 2H, 2 × ArH); <sup>13</sup>C-NMR (101 MHz, DMSO-*d*<sub>6</sub>): δ (ppm): 116.9, 127.1, 130.2, 132.9, 141.4, 148.4; <sup>19</sup>F-NMR (282 MHz, DMSO-*d*<sub>6</sub>): δ -148.24 (bs), -148.19 (bs).

Data is in accordance with the literature.<sup>3</sup>

### Bis(2-methylphenyl)iodonium tetrafluoroborate

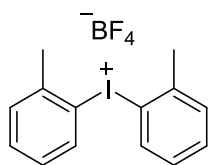

Bis(2-methylphenyl)iodonium tetrafluoroborate was synthesised according to the procedure of Bielawski *et al.*<sup>1</sup> Reaction of 2-iodotoluene (589 mg, 0.35 mL, 2.70 mmol, 1 eq) and 2-toluyllboronic acid (407 mg, 3.00 mmol, 1.1 eq) gave the target compound (803 mg, 2.03 mmol, 75%) as a white solid.

<sup>1</sup>H-NMR (300 MHz, DMSO-*d*<sub>6</sub>) δ 2.61 (s, 6H, 2 × CH<sub>3</sub>), 7.35 – 7.25 (m, 2H, 2 × ArH), 7.62 – 7.52 (m, 4H, 4 × ArH), 8.32 (d, *J* = 7.8 Hz, 2H, 2 × ArH). <sup>13</sup>C NMR (75 MHz, DMSO-*d*<sub>6</sub>) δ 25.0, 120.6, 129.3, 131.6, 132.8, 137.2, 140.6.

Data is in accordance with the literature.<sup>1</sup>

### Phenyl(2,4,6-triisopropylphenyl)iodonium tetrafluoroborate

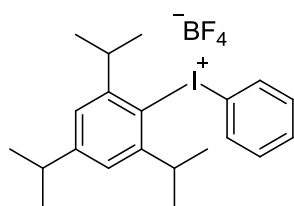

Phenyl(2,4,6-triisopropylphenyl)iodonium tetrafluoroborate was synthesised according to a modified procedure from Reisman *et al.*<sup>4</sup> Reaction of iodobenzene (1.12 mL, 10.00 mmol, 1 eq) and 1,3,5-triisopropylbenzene (2.67 mL, 11.00 mmol, 1.10 eq) gave the target compound (1.78 g, 3.60 mmol, 36%) as a white solid.

<sup>1</sup>H NMR (300 MHz, CDCl<sub>3</sub>) δ 1.26 (d, 6.8 Hz, 18H, 6 × CH<sub>3</sub>), 2.97 (sept, *J* = 7.0 Hz, 1H, CH), 3.25 (sept, *J* = 6.7 Hz, 2H, 2 × CH), 7.19 (s, 2H, 2 × ArH), 7.44 (dd, *J* = 8.4, 6.9 Hz, 2H, 2 × ArH), 7.51 – 7.59 (m, 1H, ArH), 7.64 – 7.71 (m, 2H, 2 × ArH). <sup>13</sup>C NMR (75 MHz, CDCl<sub>3</sub>) δ 23.8, 24.4, 34.3, 39.8, 112.0, 119.5, 125.6, 132.2, 132.7, 132.7, 152.7, 156.1. <sup>19</sup>F NMR (282 MHz, CDCl<sub>3</sub>) δ -147.53 (bs), -147.59 (m). *v*<sub>max</sub> (neat)/ cm<sup>-1</sup>: 741, 1011, 1041, 1084, 2966 m/z (ESI): Found [M-BF<sub>4</sub>]<sup>+</sup>, 407.1230. C<sub>21</sub>H<sub>28</sub>I<sup>+</sup> requires *M*, 407.1230.

### (4-Methylphenyl)(2,4,6-triisopropylphenyl)iodonium tetrafluoroborate

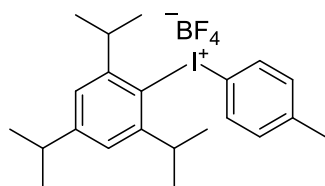

(4-Methylphenyl)(2,4,6-triisopropylphenyl)iodonium tetrafluoroborate was synthesised according to a modified procedure from Reisman *et al.*<sup>4</sup> Reaction of 4-iodotoluene (1.09 g, 5.00 mmol, 1 eq) and 1,3,5-triisopropylbenzene (1.34 mL, 5.50 mmol, 1.10 eq) gave the target compound (580 mg, 1.14 mmol, 24%) as a white solid.

<sup>1</sup>H-NMR (300 MHz, DMSO-*d*<sub>6</sub>)  $\delta$  1.21 (m, 18H, 6  $\times$  CH<sub>3</sub>), 2.32 (s, 3H, CH<sub>3</sub>), 2.95 (sept., *J* = 6.9 Hz, 1H, CH), 3.41 (sept., *J* = 6.7 Hz, 2H, 2  $\times$  CH), 7.30 (s, 2H, 2  $\times$  ArH), 7.34 (d, *J* = 8.4 Hz, 2H, 2  $\times$  ArH), 7.83 (d, *J* = 8.4 Hz, 2H, 2  $\times$  ArH); <sup>13</sup>C NMR (75 MHz, DMSO)  $\delta$  20.8, 23.6, 24.1, 33.4, 38.6, 111.4, 123.3, 124.6, 132.5, 134.1, 142.2, 151.1, 154.2.

<sup>19</sup>F-NMR (282 MHz, DMSO-*d*<sub>6</sub>):  $\delta$  -148.24 (bs), -148.21 (bs);  $\nu_{\text{max}}$  (neat)/ cm<sup>-1</sup>: 794, 1026, 1053, 2966. *m/z* (ESI): Found [M-BF<sub>4</sub>]<sup>+</sup>, 421,1385. C<sub>22</sub>H<sub>30</sub>I<sup>+</sup> requires *M*, 421.1387.

### (3-Methylphenyl)(2,4,6-triisopropylphenyl)iodonium tetrafluoroborate

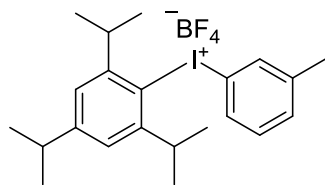

(3-Methylphenyl)(2,4,6-triisopropylphenyl)iodonium tetrafluoroborate was synthesised according to a modified procedure from Reisman *et al.*<sup>4</sup> Reaction of 3-iodotoluene (0.64 mL, 5.00 mmol, 1 eq) and 1,3,5-triisopropylbenzene (1.34 mL, 5.50 mmol, 1.10 eq) gave the target compound (802 mg, 1.58 mmol, 32%) as a white solid.

<sup>1</sup>H NMR (300 MHz, CDCl<sub>3</sub>)  $\delta$  1.36 – 1.22 (m, 18H, 6  $\times$  CH<sub>3</sub>), 2.38 (s, 3H, CH<sub>3</sub>), 2.98 (sept., *J* = 6.8 Hz, 1H, 1  $\times$  CH), 3.26 (sept., *J* = 6.7 Hz, 2H, 2  $\times$  CH), 7.20 (s, 2H, 2  $\times$  ArH), 7.28 – 7.39 (m, 3H, 3  $\times$  ArH), 7.60 (s, 1H, ArH); <sup>13</sup>C NMR (75 MHz, CDCl<sub>3</sub>)  $\delta$  21.6, 23.8, 24.5, 34.3, 39.8, 111.9, 119.3, 125.6, 129.3, 132.3, 133.1, 133.3, 143.7, 152.8, 156.1.

; <sup>19</sup>F-NMR (282 MHz, CDCl<sub>3</sub>):  $\delta$  -147.96 (bs), -147.91 (bs);  $\nu_{\text{max}}$  (neat)/ cm<sup>-1</sup>: 771, 1014, 1045, 2966. *m/z* (ESI): Found (M-BF<sub>4</sub>)<sup>+</sup>, 421.1381. C<sub>22</sub>H<sub>30</sub>I<sup>+</sup> requires *M*, 421.1387.



#### (4-Methoxyphenyl)(2,4,6-triisopropylphenyl)iodonium tetrafluoroborate

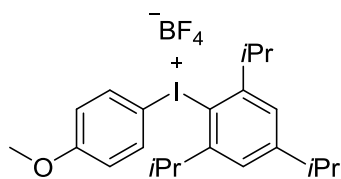

(4-Methoxyphenyl)(2,4,6-triisopropylphenyl)iodonium tetrafluoroborate was synthesised according to the procedure of Phipps *et al.*<sup>5</sup> Reaction of 4-methoxyphenylboronic acid (760 mg, 5.00 mmol, 1 eq) and 2-iodo-1,3,5-triisopropylbenzene (2.36 g, 5.24 mmol, 1.05 eq) gave the target compound (1.73 g, 3.30 mmol, 66%) as a white solid.

<sup>1</sup>H-NMR (300 MHz, CDCl<sub>3</sub>):  $\delta$  1.26 (d,  $J$  = 6.8 Hz, 6H, 2  $\times$  CH<sub>3</sub>), 1.26 (d,  $J$  = 6.8 Hz, 12H, 4  $\times$  CH<sub>3</sub>), 2.95 (hept,  $J$  = 6.8 Hz, 1H, CH), 3.31 (hept,  $J$  = 6.8 Hz, 2H, 2  $\times$  CH), 3.81 (s, 3H, OCH<sub>3</sub>), 6.95 (d,  $J$  = 9.2 Hz, 2H, 2  $\times$  ArH), 7.16 (s, 2H, 2  $\times$  ArH), 7.66 (d,  $J$  = 9.2 Hz, 2H, 2  $\times$  ArH); <sup>13</sup>C-NMR (75 MHz, CDCl<sub>3</sub>):  $\delta$  23.8, 24.5, 34.3, 39.7, 55.9, 99.9, 118.4, 120.5, 125.5, 135.3, 152.5, 155.8, 162.8; <sup>19</sup>F-NMR (282 MHz, CDCl<sub>3</sub>):  $\delta$  -148.12 (dd,  $J$  = 3.2, 1.5, Hz), -148.07 (bs).

Data is in accordance with the literature.<sup>5</sup>

#### (4-Chlorophenyl)(2,4,6-triisopropylphenyl)iodonium tetrafluoroborate

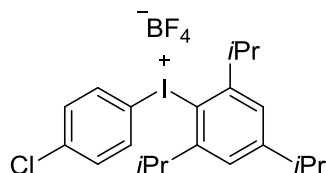

(4-Chlorophenyl)(2,4,6-triisopropylphenyl)iodonium tetrafluoroborate was synthesised according to the procedure of Phipps *et al.*<sup>5</sup> Reaction of 4-chloro-1-iodobenzene (2.38 g, 9.98 mmol, 1 eq) and 1,3,5-triisopropylbenzene (2.66 ml, 2.25 g, 11.0 mmol, 1.1 eq) gave the target compound (2.75 g, 5.20 mmol, 52%) as a white solid.

<sup>1</sup>H-NMR (300 MHz, CDCl<sub>3</sub>):  $\delta$  1.26 (d,  $J$  = 6.8 Hz, 6H, 2  $\times$  CH<sub>3</sub>), 1.26 (d,  $J$  = 6.8 Hz, 12H, 4  $\times$  CH<sub>3</sub>), 2.97 (hept,  $J$  = 6.8 Hz, 1H, CH), 3.26 (hept,  $J$  = 6.8 Hz, 2H, 2  $\times$  CH), 7.19 (s, 2H, 2  $\times$  ArH), 7.40 (d,  $J$  = 8.7 Hz, 2H, 2  $\times$  ArH), 7.64 (d,  $J$  = 8.7 Hz, 2H, 2  $\times$  ArH); <sup>13</sup>C-NMR (75 MHz, CDCl<sub>3</sub>):  $\delta$  23.8, 24.5, 34.3, 39.8, 108.8, 120.1, 125.6, 132.7, 134.1, 139.1, 152.7, 156.1; <sup>19</sup>F-NMR (282 MHz, CDCl<sub>3</sub>):  $\delta$  -146.6 (dd,  $J$  = 3.4, 1.6 Hz), -146.5 (bs).

Data is in accordance with the literature.<sup>5</sup>

#### (4-(Ethoxycarbonyl)phenyl)(2,4,6-triisopropylphenyl)iodonium tetrafluoroborate

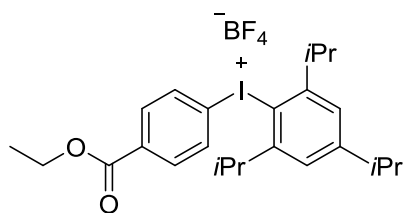

(4-(Ethoxycarbonyl)phenyl)(2,4,6-triisopropylphenyl)iodonium tetrafluoroborate was synthesised according to the procedure of Phipps *et al.*<sup>5</sup> Reaction of ethyl-4-iodobenzoate (2.76 g, 10 mmol, 1 eq) and 1,3,5-triisopropylbenzene (2.66 ml, 2.25 g, 11.0 mmol, 1.1 eq) gave the target compound (1.58 g, 2.79 mmol, 28%) as a white solid.

<sup>1</sup>H-NMR (300 MHz, CDCl<sub>3</sub>):  $\delta$  1.25 (d,  $J$  = 6.7 Hz, 12H, 4  $\times$  CH<sub>3</sub>), 1.29 (d,  $J$  = 7.0 Hz, 6H, 2  $\times$  CH<sub>3</sub>), 1.36 (t,  $J$  = 7.1 Hz, 3H, CH<sub>2</sub>CH<sub>3</sub>), 2.98 (hept,  $J$  = 7.0 Hz, 1H, CH), 3.25 (hept,  $J$  = 6.7 Hz, 2H, 2  $\times$  CH), 4.36 (q, 7.1 Hz, 2H, CH<sub>2</sub>), 7.21 (s, 2H, 2  $\times$  ArH), 7.74 (d,  $J$  = 8.6 Hz, 2H, 2  $\times$  ArH), 8.06 (d,  $J$  = 8.6 Hz, 2H, 2  $\times$  ArH); <sup>13</sup>C-NMR (75 MHz, CDCl<sub>3</sub>):  $\delta$  14.3, 23.8, 24.4, 34.4, 39.9, 62.0, 116.4, 119.8, 125.7, 132.4, 133.1, 133.9, 152.9, 156.2, 164.8; <sup>19</sup>F-NMR (282 MHz, CDCl<sub>3</sub>):  $\delta$  -146.54 (d,  $J$  = 3.2, 1.4 Hz), -145.48 (bs);  $\nu_{\text{max}}$  (neat)/cm<sup>-1</sup>: 679, 725, 756, 849, 883, 976, 999, 1049, 1095, 1180, 1277, 1370, 1393, 1462, 1582, 1717, 2874, 2936, 2967; m/z (ESI): Found [M-BF<sub>4</sub>]<sup>+</sup>, 479.1428. C<sub>24</sub>H<sub>32</sub>IO<sub>2</sub> requires  $M$ , 479.1441.

#### 2-(Methylphenyl)(2,4,6-triisopropylphenyl)iodonium tetrafluoroborate

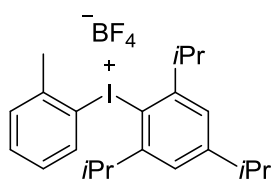

*o*-Tolyl(2,4,6-triisopropylphenyl)iodonium tetrafluoroborate was synthesised according to the procedure of Phipps *et al.*<sup>5</sup> Reaction of 2-iodo-toluene (2.18 g, 10.0 mmol, 1 eq) and 1,3,5-triisopropylbenzene (2.66 ml, 2.25 g, 11.0 mmol, 1.1 eq) gave the target compound (2.22 g, 4.37 mmol, 44%) as a white solid.

<sup>1</sup>H-NMR (300 MHz, CDCl<sub>3</sub>):  $\delta$  1.29 (d,  $J$  = 6.7 Hz, 12H, 4  $\times$  CH<sub>3</sub>), 1.34 (d,  $J$  = 6.9 Hz, 6H, 2  $\times$  CH<sub>3</sub>), 2.72 (s, 3H, CH<sub>3</sub>), 3.04 (hept,  $J$  = 6.9 Hz, 1H, CH), 3.23 (hept,  $J$  = 6.7 Hz, 2H, 2  $\times$  CH), 7.20-7.30 (m, 3H, 3  $\times$  ArH), 7.34 (d,  $J$  = 8.3 Hz, 1H, ArH), 7.48-7.58 (m, 2H, 2  $\times$  ArH); <sup>13</sup>C-NMR (75 MHz, CDCl<sub>3</sub>):  $\delta$  23.8, 24.4, 25.0, 34.3, 39.9, 116.4, 119.0, 125.8,

130.3, 132.6, 132.7, 133.0, 140.2, 152.8, 156.1.;  $^{19}\text{F}$ -NMR (282 MHz,  $\text{CDCl}_3$ ):  $\delta$ -148.64 (d,  $J = 3.2, 1.5$  Hz), -148.58 (bs) ;  $\nu_{\text{max}}$  (neat)/  $\text{cm}^{-1}$ : 644, 729, 752, 880, 980, 999, 1034, 1069, 1269, 1370, 1427, 1462, 1586, 2870, 2932, 2959;  $m/z$  (ESI): Found  $[\text{M-BF}_4]^+$ , 421.1369.  $\text{C}_{22}\text{H}_{30}\text{I}$  requires  $M$ , 421.1387.

## 3.0 Experimental and characterization of reaction products

### 3.1 Arylation of Naphthalene: General procedure A

**Note:** Efficient stirring is crucial to obtaining reproducible yields and therefore we strongly recommend the use of cross-shaped stirring bars. Alternatively, we found that using 3 small ‘standard’ linear bars rather than 1 larger bar produced reproducible results. Stirring plates were set at >1000 rpm.

Unless otherwise noted, to the iodonium salt (0.500 mmol, 1.0 eq), naphthalene (2.0 eq) and Pd/C (5 wt% Pd/C, <3% H<sub>2</sub>O, Heraeus type K-0219, 27 mg, 12.5 μmol, 2.5 mol%) was added 1,2-dimethoxyethane (5.00 mL), and the reaction stirred at the reported temperature for 16 h. The reaction mixture was allowed to cool to room temperature and then filtered through a pad of silica, washing with EtOAc (60 mL). The filtrate was concentrated in vacuo and the crude material purified by flash column chromatography.

#### 1-Phenylnaphthalene (**3a**)

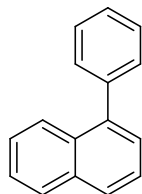

According to general procedure A: Reaction of naphthalene (**2**) (77 mg, 0.600 mmol, 2 eq) and diphenyliodonium tetrafluoroborate (110 mg, 0.300 mmol, 1 eq) in DME (3.0 mL) at 80 °C following purification using flash column chromatography eluting with 3% toluene in pentane gave **3a** (36 mg, 0.176 mmol, 59%) as a colourless oil.

$R_f$  (3% toluene in pentane): 0.35; <sup>1</sup>H-NMR (400 MHz, CDCl<sub>3</sub>): δ 7.41-7.57 (m, 9H, 9 × ArH), 7.85-7.94 (m, 3H, 3 × ArH); <sup>13</sup>C-NMR (101 MHz, CDCl<sub>3</sub>): δ 125.5, 125.9, 126.15, 126.16, 127.1, 127.4, 127.8, 128.4, 130.2, 131.7, 133.9, 140.4, 140.9.

Data is in accordance with the literature.<sup>6</sup>

### 1-(2-Methylphenyl)naphthalene (**3b**)

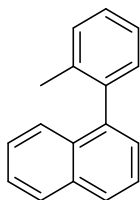

According to general procedure A: Reaction of naphthalene (**2**) (128 mg, 1.00 mmol, 2 eq) and bis(2-methylphenyl)iodonium tetrafluoroborate (198 mg, 0.500 mmol, 1 eq) at 80 °C following purification using flash column chromatography eluting with 3% toluene in pentane gave **3b** (65 mg, 0.298 mmol, 60%) as a white solid.

$R_f$  (3% toluene in pentane): 0.48.  $^1\text{H}$  NMR (300 MHz,  $\text{CDCl}_3$ )  $\delta$  7.85 – 7.75 (m, 2H,  $2 \times \text{ArH}$ ), 7.47 – 7.35 (m, 3H,  $3 \times \text{ArH}$ ), 7.33 – 7.14 (m, 6H,  $6 \times \text{ArH}$ ), 1.94 (s, 3H,  $\text{CH}_3$ );  $^{13}\text{C}$  NMR (75 MHz,  $\text{CDCl}_3$ )  $\delta$  140.3, 139.9, 136.9, 133.6, 132.1, 130.5, 130.0, 128.3, 127.7, 127.5, 126.7, 126.2, 126.1, 125.8, 125.7, 125.5, 20.2.

Data is in accordance with the literature.<sup>7</sup>

### 1-(2-Fluorophenyl)naphthalene (**3c**)

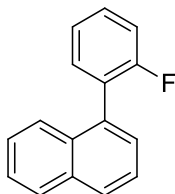

According to general procedure A: Reaction of naphthalene (**2**) (128 mg, 1.00 mmol, 2 eq) and bis(2-fluorophenyl)iodonium tetrafluoroborate (202 mg, 0.500 mmol, 1 eq) at 100 °C following purification using flash column chromatography eluting with pentane gave **3c** (57 mg, 0.256 mmol, 51%) as a colourless oil.

$R_f$  (pentane): 0.35;  $^1\text{H}$ -NMR (400 MHz,  $\text{CDCl}_3$ ):  $\delta$  7.20-7.34 (m, 2H,  $2 \times \text{ArH}$ ), 7.39-7.51 (m, 4H,  $4 \times \text{ArH}$ ), 7.50-7.60 (m, 2H,  $2 \times \text{ArH}$ ), 7.66-7.73 (m, 1H, ArH), 7.88-7.97 (m, 2H,  $2 \times \text{ArH}$ );  $^{13}\text{C}$ -NMR (101 MHz,  $\text{CDCl}_3$ ):  $\delta$  115.8 (d,  $J = 22.3$  Hz), 124.2 (d,  $J = 3.7$  Hz), 125.4, 125.95 (d,  $J = 1.4$  Hz), 126.02, 126.3, 127.8, 128.1 (d,  $J = 16.2$  Hz), 128.4, 128.5, 129.6 (d,  $J = 7.9$  Hz), 131.9, 132.5 (d,  $J = 3.6$  Hz), 133.7, 134.0, 160.2 (d,  $J = 246.7$  Hz).

Data is in accordance with the literature.<sup>8</sup>

### 1-(3-Nitrophenyl)naphthalene (**3d**)

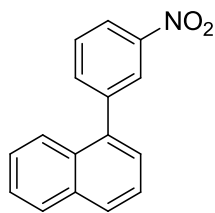

According to general procedure A: Reaction of naphthalene (**2**) (128 mg, 1.00 mmol, 2 eq) and bis(3-nitrophenyl)iodonium tetrafluoroborate (229 mg, 0.500 mmol, 1 eq) at 100 °C following purification using flash column chromatography eluting with 2% Et<sub>2</sub>O in pentane gave **3d** (50 mg, 0.201 mmol, 40%) as a pale yellow solid.

R<sub>f</sub> (2% Et<sub>2</sub>O in pentane): 0.20; <sup>1</sup>H-NMR (300 MHz, CDCl<sub>3</sub>): δ 7.40-7.60 (m, 4H, 4 × ArH), 7.67 (t, *J* = 7.9 Hz, 1H, ArH), 7.77 (dd, *J* = 8.2, 1.0 Hz, 1H, ArH), 7.84 (dt, *J* = 7.9, 1.5 Hz, 1H, ArH), 7.91-7.97 (m, 2H, 2 × ArH), 8.31 (ddd, *J* = 8.2, 2.3, 1.0 Hz, 1H, ArH), 8.39 (t, *J* = 2.0 Hz, 1H, ArH); <sup>13</sup>C-NMR (75 MHz, CDCl<sub>3</sub>): δ 122.4, 125.0, 125.2, 125.5, 126.3, 126.9, 127.4, 128.7, 128.9, 129.4, 131.2, 133.9, 136.3, 137.6, 142.6, 148.5.

Data is in accordance with the literature.<sup>9</sup>

### 1-(4-Fluorophenyl)naphthalene (**3e**)

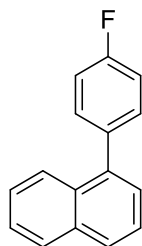

According to general procedure A: Reaction of naphthalene (**2**) (128 mg, 1.00 mmol, 2 eq) and bis(4-fluorophenyl)iodonium tetrafluoroborate (202 mg, 0.500 mmol, 1 eq) at 80 °C following purification using flash column chromatography eluting with pentane gave **3e** (59 mg, 0.266 mmol, 54%) as a white solid.

R<sub>f</sub> (pentane): 0.38. <sup>1</sup>H-NMR (300 MHz, CDCl<sub>3</sub>) δ 7.19 (t, *J* = 8.8 Hz, 2H, 2 × ArH), 7.38 – 7.58 (m, 6H, 6 × ArH), 7.86 (t, *J* = 7.5 Hz, 2H, 2 × ArH), 7.92 (dd, *J* = 8.2, 1.5 Hz, 1H, ArH); <sup>13</sup>C-NMR (75 MHz, CDCl<sub>3</sub>) δ 115.3 (d, *J* = 21.3 Hz), 125.5, 125.9, 126.0, 126.3, 127.1, 127.9, 128.5, 131.5 (d, *J* = 7.9 Hz), 131.7, 133.9, 136.8 (d, *J* = 3.3 Hz), 139.3, 162.4 (d, *J* = 246.1 Hz); <sup>19</sup>F-NMR (282 MHz, CDCl<sub>3</sub>) δ -115.5.

Data is in accordance with the literature.<sup>6</sup>

### 1-(4-Methoxyphenyl)naphthalene (**3f**)

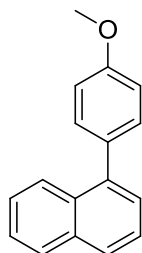

According to general procedure A: Reaction of naphthalene (**2**) (128 mg, 1.00 mmol, 2 eq) and (4-methoxyphenyl)(2,4,6-triisopropylphenyl)iodonium tetrafluoroborate (262 mg, 0.500 mmol, 1 eq) at 80 °C following purification using flash column chromatography eluting with 2% EtOAc and 2% toluene in pentane gave **3f** (64 mg, 0.273 mmol, 54%) as a white solid.

$R_f$  (3% EtOAc in pentane): 0.33;  $^1\text{H-NMR}$  (300 MHz,  $\text{CDCl}_3$ ):  $\delta$  3.91 (s, 3H,  $\text{OCH}_3$ ), 7.06 (d,  $J = 8.6$  Hz, 2H,  $2 \times \text{ArH}$ ), 7.38-7.59 (m, 6 H,  $6 \times \text{ArH}$ ), 7.86 (d,  $J = 8.2$  Hz, 1H, ArH), 7.88-8.01 (m, 2H,  $2 \times \text{ArH}$ );  $^{13}\text{C-NMR}$  (75 MHz,  $\text{CDCl}_3$ ):  $\delta$  55.5, 113.8, 125.5, 125.8, 126.1, 126.2, 127.0, 127.5, 128.4, 131.2, 131.9, 133.2, 134.0, 140.0, 159.1.

Data is in accordance with the literature.<sup>10</sup>

### 1-(3-Methylphenyl)naphthalene (**3g**)

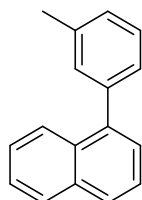

According to general procedure A: Reaction of naphthalene (**2**) (128 mg, 1.00 mmol, 2 eq) and (3-methylphenyl)(2,4,6-triisopropylphenyl)iodonium tetrafluoroborate (254 mg, 0.500 mmol, 1 eq) at 80 °C following purification using flash column chromatography eluting with pentane:toluene (97:3) gave **3g** (44 mg, 0.201 mmol, 40%) as a colorless oil.

$R_f$  (3% toluene in pentane): 0.50.  $^1\text{H-NMR}$  (300 MHz,  $\text{CDCl}_3$ )  $\delta$  2.39 (s, 3H,  $\text{CH}_3$ ), 7.24 – 7.17 (m, 1H, ArH), 7.29 – 7.50 (m, 7H,  $7 \times \text{ArH}$ ), 7.80 (d,  $J = 8.2$  Hz, 1H, ArH), 7.85 (ddd,  $J = 7.8, 3.8, 1.4$  Hz, 2H,  $2 \times \text{ArH}$ ).  $^{13}\text{C-NMR}$  (75 MHz,  $\text{CDCl}_3$ )  $\delta$  21.7, 125.5, 125.8, 126.1, 126.2, 127.0, 127.3, 127.6, 128.1, 128.2, 128.4, 130.9, 131.8, 133.9, 138.0, 140.5, 140.8.

Data is in accordance with the literature.<sup>7</sup>

### 1-(4-Methylphenyl)naphthalene (**3h**)

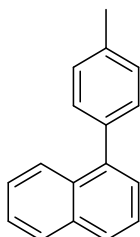

According to general procedure A: Reaction of naphthalene (**2**) (51,2 mg, 0,40 mmol, 2 eq) and (4-methylphenyl)(2,4,6-triisopropylphenyl)iodonium tetrafluoroborate (102 mg, 0.200 mmol, 1 eq) at 100 °C following purification using flash column chromatography eluting with pentane gave **3h** (20,6 mg, 0.094 mmol, 48%) as a colorless oil.

$R_f$  (pentane): 0.39.  $^1\text{H}$  NMR (400 MHz,  $\text{CDCl}_3$ )  $\delta$  2.49 (s, 3H,  $\text{CH}_3$ ), 7.33 (d,  $J = 7.8$  Hz, 2H,  $2 \times \text{ArH}$ ), 7.40 – 7.48 (m, 4H,  $4 \times \text{ArH}$ ), 7.48 – 7.58 (m, 2H,  $2 \times \text{ArH}$ ), 7.87 (dt,  $J = 8.2, 1.1$  Hz, 1H, ArH), 7.94 (ddd,  $J = 12.2, 8.3, 1.3$  Hz, 2H,  $2 \times \text{ArH}$ ).  $^{13}\text{C}$  NMR (101 MHz,  $\text{CDCl}_3$ )  $\delta$  21.4, 125.5, 125.8, 126.0, 126.2, 126.9, 127.0, 127.6, 128.4, 129.1, 129.6, 130.1, 131.8, 133.9, 137.0, 137.9, 140.4.

Data is in accordance with the literature.<sup>7</sup>

### Methyl 4-(naphthalene-1-yl)benzoate (**3i**)

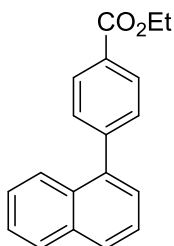

According to general procedure A: Reaction of naphthalene (**2**) (128 mg, 1.00 mmol, 2 eq) and (4-(ethoxycarbonyl)phenyl)(2,4,6-triisopropylphenyl)iodonium tetrafluoroborate (283 mg, 0.500 mmol, 1 eq) at 100 °C following purification using flash column chromatography eluting with 2% EtOAc in pentane gave **3i** (62 mg, 0.224 mmol, 45%) as a white solid.

$R_f$  (2% EtOAc in pentane): 0.19;  $^1\text{H}$ -NMR (400 MHz,  $\text{CDCl}_3$ ):  $\delta$  1.45 (t,  $J = 7.1$  Hz, 3H,  $\text{CH}_3$ ), 4.45 (q,  $J = 7.1$  Hz, 2H,  $\text{CH}_2$ ), 7.41-7.61 (m, 6H,  $6 \times \text{ArH}$ ), 7.82-7.96 (m, 3 H,  $3 \times \text{ArH}$ ), 8.19 (d,  $J = 8.4$  Hz, 2H,  $2 \times \text{ArH}$ );  $^{13}\text{C}$ -NMR (101 MHz,  $\text{CDCl}_3$ ): 14.5, 61.2, 125.5, 125.8, 126.1, 126.5, 127.1, 128.4, 128.5, 129.5, 129.7, 130.2, 131.4, 133.9, 139.3, 145.6, 166.7.



Data is in accordance with the literature.<sup>11</sup>

### 1-(4-Chlorophenyl)naphthalene (**3j**)

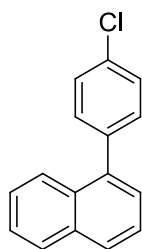

According to general procedure A: Reaction of naphthalene (**2**) (128 mg, 1.00 mmol, 2 eq) and (4-chlorophenyl)(2,4,6-triisopropylphenyl)iodonium tetrafluoroborate (264 mg, 0.500 mmol, 1 eq) at 100 °C following purification using flash column chromatography eluting with pentane gave **3j** (48 mg, 0.201 mmol, 40%) as a white solid.

$R_f$  (pentane): 0.50;  $^1\text{H-NMR}$  (400 MHz,  $\text{CDCl}_3$ ):  $\delta$  7.38-7.58 (m, 8H,  $8 \times \text{ArH}$ ), 7.88 (d,  $J = 8.4$  Hz, 1H, ArH), 7.90 (d,  $J = 8.2$  Hz, 1H, ArH), 7.94 (d,  $J = 8.0$  Hz, 1H, ArH);  $^{13}\text{C-NMR}$  (101 MHz,  $\text{CDCl}_3$ ): 125.5, 125.8, 126.0, 126.4, 127.1, 128.1, 128.5, 128.6, 131.47, 131.54, 133.4, 133.9, 139.0, 139.3.

Data is in accordance with the literature.<sup>6</sup>

## 3.2 Arylation of triphenylene: General procedure B

To the iodonium salt (0.400 mmol, 1.0 eq), triphenylene (182 mg, 0.800 mmol, 2.0 eq) and Pd/C (5 wt% Pd/C, <3%  $\text{H}_2\text{O}$ , Heraeus type K-0219, 42 mg, 5 mol%) was added 1,2-dimethoxyethane (2.00 mL), and the reaction stirred at 100 °C for 24 h. The reaction mixture was allowed to cool to room temperature and then filtered through a pad of silica, washing with EtOAc (60 mL). The filtrate was concentrated in vacuo and the crude material purified by flash column chromatography.

### 1-Phenyltriphenylene (5a)

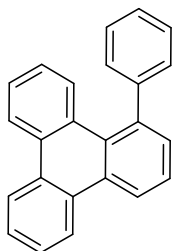

Reaction of triphenylene (182 mg, 0.800 mmol, 2 eq) and diphenyliodonium tetrafluoroborate (147 mg, 0.400 mmol, 1 eq) following purification using flash column chromatography eluting with 3% toluene in pentane gave **5a** (79 mg, 0.26 mmol, 65%) as a white solid.

$R_f$  (pentane): 0.14;  $^1\text{H-NMR}$  (300 MHz,  $\text{CDCl}_3$ ):  $\delta$  7.06 (ddd,  $J = 8.4$  Hz,  $J = 7.0$  Hz, 1.4 Hz, 1H, ArH), 7.36-7.49 (m, 6H,  $6 \times \text{ArH}$ ), 7.53 (dd,  $J = 7.3$  Hz,  $J = 1.4$  Hz, 1H, ArH), 7.62-7.70 (m, 3H,  $3 \times \text{ArH}$ ), 7.73 (dd,  $J = 8.5$  Hz,  $J = 1.2$  Hz, 1H, Ar-H), 8.55 (d,  $J = 8.0$  Hz, 1H, ArH), 8.58-8.68 (m, 3H,  $3 \times \text{ArH}$ );  $^{13}\text{C-NMR}$  (101 MHz,  $\text{CDCl}_3$ ): 122.4, 123.2, 123.3, 123.8, 125.1, 126.5, 126.7, 127.0, 127.45, 127.47, 128.8, 129.1, 129.3, 129.8, 130.1, 130.2, 130.4, 131.1, 131.5, 131.7, 140.8, 145.5;  $\nu_{\text{max}}$  (neat)/  $\text{cm}^{-1}$ : 748, 768, 810, 1400, 1431, 1493, 1955, 3024, 3051, 3075; GC-MS (EI):  $t_R$  (50\_40): 14.7 min;  $m/z$  (%): 305 (21), 304 (99), 303 (100), 302 (65), 300 (25), 289 (20);  $m/z$  (APCI): Found (M), 304,1242.  $\text{C}_{24}\text{H}_{16}$  requires  $M$ , 304,1252.

### 1-(4-Bromophenyl)triphenylene (5b)

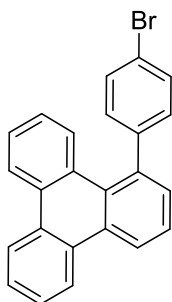

Reaction of triphenylene (182 mg, 0.800 mmol, 2 eq) and bis(4-bromophenyl)iodonium tetrafluoroborate (211 mg, 0.400 mmol, 1 eq) following purification using flash column chromatography eluting with 2% toluene in pentane gave **5b** (89 mg, 0.232 mmol, 58%) as a white solid.

$R_f$  (pentane): 0.26;  $^1\text{H}$  NMR (300 MHz,  $\text{CDCl}_3$ )  $\delta$  7.13 (ddd,  $J = 8.4, 7.0, 1.4$  Hz, 1H, ArH), 7.26 – 7.34 (m, 2H,  $2 \times \text{ArH}$ ), 7.43 – 7.52 (m, 2H,  $2 \times \text{ArH}$ ), 7.52 – 7.60 (m, 2H,  $2 \times \text{ArH}$ ), 7.59 – 7.77 (m, 4H,  $4 \times \text{ArH}$ ), 8.46 – 8.70 (m, 4H,  $4 \times \text{ArH}$ );  $^{13}\text{C}$  NMR (75 MHz,  $\text{CDCl}_3$ )  $\delta$  121.2, 122.7, 123.3, 123.4, 123.8, 125.3, 126.6, 126.9, 127.5, 127.6, 128.6, 129.4, 129.9, 130.1, 130.3, 130.9, 131.2, 131.4, 131.8, 132.3, 139.4, 144.4;  $\nu_{\text{max}}$  (neat)/  $\text{cm}^{-1}$ : 725, 748, 806, 1003, 1261, 1431, 1489; GC-MS was uninformative;  $m/z$  (APCI): Found (M), 382,0350.  $\text{C}_{24}\text{H}_{15}\text{Br}$  requires  $M$ , 382,0357.

### 1-(3-Nitrophenyl)triphenylene (5c)

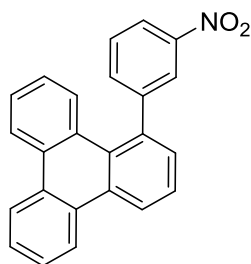

Reaction of triphenylene (137 mg, 0.600 mmol, 2 eq) and bis(3-nitrophenyl)iodonium tetrafluoroborate (137 mg, 0.300 mmol, 1 eq) with Pd/C (32 mg, 5 mol%) following purification using flash column chromatography eluting with 2% EtOAc in pentane gave **5c** (42 mg, 0.120 mmol, 40%) as a yellow solid.

$R_f$  (5% EtOAc in pentane): 0.4;  $^1\text{H}$  NMR (400 MHz,  $\text{CDCl}_3$ )  $\delta$  8.71 – 8.60 (m, 3H,  $3 \times \text{ArH}$ ), 8.57 (dd,  $J = 8.3, 1.3$  Hz, 1H, ArH), 8.37 (t,  $J = 2.0, 2.0$  Hz, 1H, ArH), 8.25 (ddd,  $J = 8.3, 2.3, 1.1$  Hz, 1H, ArH), 7.76 – 7.63 (m, 4H,  $4 \times \text{ArH}$ ), 7.61 – 7.42 (m, 4H,  $4 \times \text{ArH}$ ), 7.06 (ddd,  $J = 8.4, 7.0, 1.4$  Hz, 1H, ArH).  $^{13}\text{C}$  NMR (101 MHz,  $\text{CDCl}_3$ )  $\delta$  149.0, 147.1, 138.0, 135.8, 132.1, 131.5, 131.4, 130.4, 130.1, 129.9, 129.8, 128.9, 128.6, 127.8, 127.7, 127.2, 126.7, 125.3, 123.9, 123.8, 123.7, 123.4, 123.3, 122.0.  $\nu_{\text{max}}$  (neat)/  $\text{cm}^{-1}$ : 725, 748, 810, 1003, 1068, 1264, 1338, 1431, 1489, 1523;  $m/z$  (ESI): Found (M + Na), 372.0995.  $\text{C}_{24}\text{H}_{15}\text{NNaO}_2$  requires  $M$ , 372.1000.

### 1-(*o*-Tolyl)triphenylene (5d)

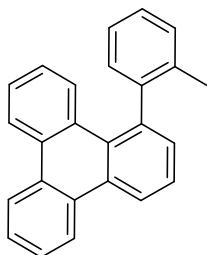

Reaction of triphenylene (137 mg, 0.600 mmol, 2 eq) and bis(2-methylphenyl)iodonium tetrafluoroborate (119 mg, 0.300 mmol, 1 eq) with Pd/C (32 mg, 5 mol%) following purification using flash column chromatography eluting with 2% EtOAc in pentane gave **5d** (43 mg, 0.135 mmol, 45%) as a colourless amorphous solid.

$R_f$  (2% toluene in pentane): 0.2;  $^1\text{H}$  NMR (300 MHz,  $\text{CDCl}_3$ )  $\delta$  8.79 – 8.30 (m, 4H,  $4 \times \text{ArH}$ ), 7.65 (dd,  $J = 8.5, 1.3$  Hz, 1H, ArH), 7.57 (ddd,  $J = 7.1, 5.4, 3.0$  Hz, 3H,  $3 \times \text{ArH}$ ), 7.39 (ddd,  $J = 8.2, 7.0, 1.3$  Hz, 1H, ArH), 7.33 (dd,  $J = 7.3, 1.4$  Hz, 1H, ArH), 7.29 – 7.07 (m, 4H,  $4 \times \text{ArH}$ ), 6.98 (ddd,  $J = 8.4, 7.0, 1.4$  Hz, 1H, ArH), 1.79 (s, 3H,  $\text{CH}_3$ );  $^{13}\text{C}$  NMR (75 MHz,  $\text{CDCl}_3$ )  $\delta$  145.3, 140.0, 135.5, 131.5, 131.2, 130.7, 130.4, 130.3, 129.6, 129.2, 129.1, 128.4, 127.8, 127.5, 127.4, 127.4, 126.8, 126.5, 125.9, 123.8, 123.3, 123.1, 122.6, 20.2.  $\nu_{\text{max}}$  (neat)/  $\text{cm}^{-1}$ : 729, 748, 837, 1219, 1431, 1508, 1600, 3047, 3067.  $m/z$  (APCI): Found ( $M + \text{H}$ ), 319, 1476.  $\text{C}_{25}\text{H}_{19}$  requires  $M$ , 319, 1487.

### 1-(4-Fluorophenyl)triphenylene (5e)

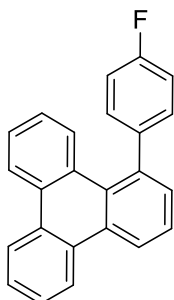

Reaction of triphenylene (182 mg, 0.800 mmol, 2 eq) and bis(4-fluorophenyl)iodonium tetrafluoroborate (162 mg, 0.400 mmol, 1 eq) at 100 °C following purification using flash column chromatography eluting with a gradient of 0-5% toluene in pentane gave **5e** (81 mg, 0.251 mmol, 63%) as a white solid.

$R_f$  (Pentane): 0.12.  $^1\text{H}$  NMR (300 MHz,  $\text{CDCl}_3$ )  $\delta$  = 7.07 – 7.18 (m, 3H), 7.34 – 7.42 (m, 2H), 7.5 (ddd,  $J = 8.2, 5.8, 1.4$  Hz, 2H), 7.60 – 7.74 (m, 4H), 8.6 (dd,  $J = 8.2, 1.3$  Hz, 1H), 8.6 (ddd,

$J=8.8, 5.3, 2.4$  Hz, 3H);  $^{13}\text{C}$  NMR (75 MHz,  $\text{CDCl}_3$ )  $\delta$  163.86, 160.60, 141.40 (d,  $J = 3.5$  Hz), 139.67, 131.50 (t,  $J = 22.4$  Hz), 130.79 (d,  $J = 7.8$  Hz), 130.55 – 129.45 (m), 128.76, 127.54 (d,  $J = 3.2$  Hz), 126.83, 126.51, 125.18, 123.77, 123.31 (d,  $J = 6.1$  Hz), 122.54, 116.09 (d,  $J = 21.3$  Hz).  $^{19}\text{F}$  NMR (282 MHz,  $\text{CDCl}_3$ )  $\delta$  -115.75.  $\nu_{\text{max}}$  (neat)/  $\text{cm}^{-1}$ : 729, 748, 837, 1219, 1431, 1508, 1600, 3047, 3067.  $m/z$  (APCI): Found (M + H), 321,1071.  $\text{C}_{24}\text{H}_{14}\text{F}$  requires  $M$ , 321,1074.

### Ethyl 3-(triphenylen-1-yl)benzoate (**5f**)

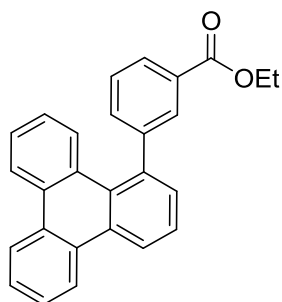

Reaction of triphenylene (182 mg, 0.800 mmol, 2 eq) and bis(3-(ethoxycarbonyl)phenyl)iodonium tetrafluoroborate (205 mg, 0.400 mmol, 1 eq) following purification using flash column chromatography eluting with 2% EtOAc in pentane gave **5f** (77 mg, 0.204 mmol, 51%) as a colourless amorphous solid.

$R_f$  (2% EtOAc in pentane): 0.25;  $^1\text{H}$  NMR (300 MHz,  $\text{CDCl}_3$ )  $\delta$  8.69 – 8.59 (m, 3H, 3  $\times$  ArH), 8.58 – 8.51 (m, 1H, ArH), 8.24 (td,  $J = 1.8, 1.7, 0.6$  Hz, 1H, ArH), 8.10 (dt,  $J = 7.4, 1.6, 1.6$  Hz, 1H, ArH), 7.74 – 7.58 (m, 4H, 4  $\times$  ArH), 7.58 – 7.35 (m, 4H, 4  $\times$  ArH), 7.06 (ddd,  $J = 8.3, 7.0, 1.3$  Hz, 1H, ArH), 4.41 (q,  $J = 7.1, 7.1, 7.1$  Hz, 2H, 2  $\times$  ArH), 1.41 (t,  $J = 7.1, 7.1$  Hz, 3H, 3  $\times$  ArH).  $^{13}\text{C}$  NMR (75 MHz,  $\text{CDCl}_3$ )  $\delta$  166.7, 145.7, 139.7, 134.1, 131.8, 131.6, 131.6, 131.2, 130.3, 130.1, 130.0, 129.9, 129.5, 129.0, 128.7, 128.2, 127.6, 127.5, 126.9, 126.5, 125.2, 123.8, 123.4, 123.3, 122.8, 61.2, 14.5.  $\nu_{\text{max}}$  (neat)/  $\text{cm}^{-1}$ : 725, 748, 810, 1003, 1091, 1238, 1431, 1489, 1713;  $m/z$  (APCI): Found (M + Na), 399,1355.  $\text{C}_{27}\text{H}_{20}\text{NaO}_2$  requires  $M$ , 399,1361.

### 1-(4-Chlorophenyl)triphenylene (**5g**)

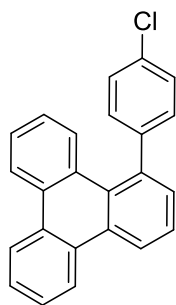

Reaction of triphenylene (182 mg, 0.800 mmol, 2 eq) and (4-chlorophenyl)(2,4,6-triisopropylphenyl)iodonium tetrafluoroborate (211 mg, 0.400 mmol, 1 eq) following purification using flash column chromatography eluting with 2% EtOAc in pentane gave **5g** (87 mg, 0.256 mmol, 64%) as a white solid.

R<sub>f</sub> (6% toluene in pentane): 0.38; <sup>1</sup>H NMR (300 MHz, CDCl<sub>3</sub>) δ 8.75 – 8.47 (m, 4H, 4 × ArH), 7.83 – 7.57 (m, 4H, 4 × ArH), 7.53 – 7.45 (m, 2H, 2 × ArH), 7.44 – 7.32 (m, 4H, 4 × ArH), 7.12 (ddd, *J* = 8.4, 7.0, 1.4 Hz, 1H, ArH). <sup>13</sup>C NMR (75 MHz, CDCl<sub>3</sub>) δ 143.9, 139.4, 133.1, 131.8, 131.4, 131.2, 130.6, 130.3, 130.1, 130.0, 129.5, 129.3, 128.7, 127.6, 127.5, 126.9, 126.5, 125.3, 123.8, 123.4, 123.3, 122.7. *v*<sub>max</sub> (neat)/cm<sup>-1</sup> 725, 748, 772, 810, 1066, 1084, 1435, 1489; *m/z* (APCI): Found (*M*), 338,0855. C<sub>24</sub>H<sub>14</sub>Cl requires *M*, 338,0862.

## 3.3 Arylation of other PAHs

### 1-Phenylanthracene (**6a**)

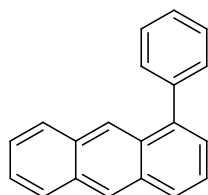

According to general procedure A: Reaction of anthracene (445 mg, 2.50 mmol, 5 eq) and diphenyliodonium tetrafluoroborate (184 mg, 0.500 mmol, 1 eq) at 80 °C following purification using flash column chromatography eluting with 3% toluene in pentane gave **6a** (69 mg, 0.271 mmol, 54%) as a pale yellow solid.

$R_f$  (3% toluene in pentane): 0.30;  $^1\text{H-NMR}$  (400 MHz,  $\text{CDCl}_3$ ):  $\delta$  7.40-7.65 (m, 9H,  $9 \times \text{ArH}$ ), 7.91 (d,  $J = 8.4$  Hz, 1H, ArH), 8.04 (dd,  $J = 8.6, 4.4$  Hz, 2H,  $2 \times \text{ArH}$ ), 8.51 (d,  $J = 3.8$  Hz, 2H,  $2 \times \text{ArH}$ );  $^{13}\text{C-NMR}$  (101 MHz,  $\text{CDCl}_3$ ): 125.1, 125.1, 125.4, 125.7, 126.3, 126.7, 127.5, 128.0, 128.1, 128.5, 128.7, 130.3, 130.4, 131.6, 131.9, 132.2, 140.4, 141.1;  $\nu_{\text{max}}$  (neat)/  $\text{cm}^{-1}$ : 702, 729, 799, 849, 883, 956, 1026, 1072, 1091, 1165, 1261, 1447, 1489, 1539, 2851, 2924, 2963, 3055; GC-MS (EI):  $t_R$  (50\_40): 10.8 min;  $m/z$  (%): 255 (20), 254 (100), 253 (74), 252 (50);  $m/z$  (ESI): Found ( $M + \text{Ag}$ ), 361.0140.  $\text{C}_{20}\text{H}_{14}\text{Ag}$  requires  $M$ , 361.0141.

### 1-(4-Chlorophenyl)anthracene (6b)

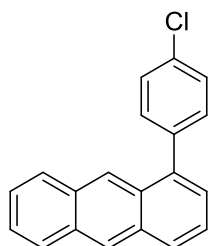

According to general procedure A: Reaction of anthracene (445 mg, 2.50 mmol, 5 eq) and (4-chlorophenyl)(2,4,6-triisopropylphenyl)iodonium tetrafluoroborate (264 mg, 0.500 mmol, 1 eq) at 100 °C following purification by flash column chromatography ( $\times 2$ ) eluting with pentane gave **6b** (71 mg, 0.246 mmol, 49%) as a pale yellow solid.

$R_f$  (pentane): 0.35.  $^1\text{H NMR}$  (400 MHz,  $\text{CDCl}_3$ )  $\delta$  7.38 (dd,  $J = 6.8, 1.2$  Hz, 1H, ArH), 7.42 – 7.60 (m, 7H,  $7 \times \text{ArH}$ ), 7.90 (d,  $J = 8.2$  Hz, 1H, ArH), 7.98 – 8.09 (m, 2H,  $2 \times \text{ArH}$ ), 8.42 (d,  $J = 13.1$  Hz, 1H, ArH), 8.50 (s, 1H, ArH).  $^{13}\text{C-NMR}$  (75 MHz,  $\text{CDCl}_3$ )  $\delta$  139.4, 139.0, 133.6, 132.1, 131.9, 131.6, 131.5, 130.2, 128.8, 128.7, 128.4, 128.0, 126.8, 126.4, 125.9, 125.6, 124.9, 124.8.  $\nu_{\text{max}}$  (neat)/  $\text{cm}^{-1}$ : 736, 887, 1485, 3051.  $m/z$  (ESI): Found ( $M$ ), 288.0700.  $\text{C}_{20}\text{H}_{13}\text{Cl}$  requires  $M$ , 288.0700.

### Ethyl 3-(anthracen-1-yl)benzoate (6c)

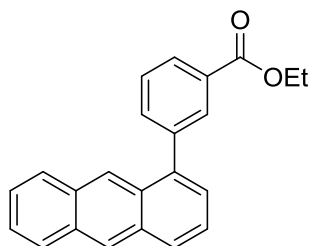

According to general procedure B: Reaction of anthracene (148 mg, 0.800 mmol, 2 eq) and bis(3-(ethoxycarbonyl)phenyl)iodonium tetrafluoroborate (205 mg, 0.400 mmol, 1 eq) at

100 °C following purification by flash column chromatography eluting with 2% EtOAc in pentane gave **6c** (57 mg, 0.176 mmol, 44%) as a yellow oil.

$R_f$  (2% EtOAc:pentane): 0.33.  $^1\text{H}$  NMR (400 MHz,  $\text{CDCl}_3$ )  $\delta$  1.42 (t,  $J = 7.1$  Hz, 3H,  $\text{CH}_3$ ), 4.44 (q,  $J = 7.1$  Hz, 2H,  $\text{CH}_2$ ), 7.40 – 7.59 (m, 4H,  $4 \times \text{ArH}$ ), 7.64 (t,  $J = 7.6$  Hz, 1H, ArH), 7.79 (dt,  $J = 7.6, 1.4$  Hz, 1H, ArH), 7.90 (d,  $J = 8.2$  Hz, 1H, ArH), 8.05 (t,  $J = 9.0$  Hz, 2H, ArH), 8.21 (dt,  $J = 7.8, 1.4$  Hz, 1H, ArH), 8.30 (t,  $J = 1.5$  Hz, 1H, ArH), 8.37 (s, 1H, ArH), 8.52 (s, 1H, ArH).  $^{13}\text{C}$  NMR (75 MHz,  $\text{CDCl}_3$ )  $\delta$  14.5, 61.2, 124.8, 124.9, 125.6, 125.8, 126.5, 126.8, 128.0, 128.5, 128.5, 128.7, 128.7, 130.2, 131.0, 131.2, 131.6, 131.9, 132.1, 134.6, 139.3, 141.3, 166.7.  $\nu_{\text{max}}$  (neat)/  $\text{cm}^{-1}$ : 648, 879, 1107, 1211, 1249, 1292, 1712.  $m/z$  (ESI): Found (M), 327.1380.  $\text{C}_{23}\text{H}_{19}\text{O}_2$  requires  $M$ , 327.1385.

#### 4-Phenylpyrene (7a)

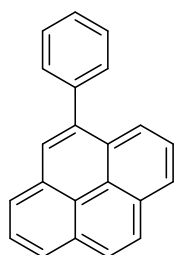

According to general procedure A: Reaction of pyrene (202 mg, 1.00 mmol, 2 eq) and bis(3-(ethoxycarbonyl)phenyl)iodonium tetrafluoroborate (205 mg, 0.400 mmol, 1 eq) at 100 °C following purification using flash column chromatography eluting with pentane gave **7a** (101 mg, 0.363 mmol, 72%) as a white solid.

$R_f$  (pentane): 0.24;  $^1\text{H}$ -NMR (300 MHz,  $\text{CDCl}_3$ ):  $\delta$  7.49-7.65 (m, 3H,  $3 \times \text{ArH}$ ), 7.71 (dd,  $J = 8.1, 1.5$  Hz, 2H,  $2 \times \text{ArH}$ ), 7.98 (t,  $J = 7.8$  Hz, 1H, ArH), 8.05 (t,  $J = 7.7$  Hz, 1H, ArH), 8.06 (s, 1H, ArH), 8.13 (s, 2H,  $2 \times \text{ArH}$ ), 8.19-8.27 (m, 4H,  $4 \times \text{ArH}$ );  $^{13}\text{C}$ -NMR (75 MHz,  $\text{CDCl}_3$ ): 124.0, 124.3, 125.0, 125.1, 125.2, 125.3, 125.9, 126.2, 127.4, 127.7, 127.8, 127.9, 128.6, 130.2, 130.6, 130.9, 131.2, 131.5, 139.7, 141.0.

Data is in accordance with the literature.<sup>12</sup>



#### 4-(2-Methylphenyl)pyrene (7b)

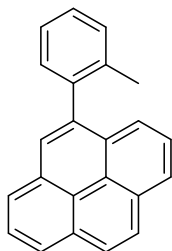

According to general procedure A: Reaction of pyrene (202 mg, 1.00 mmol, 2 eq) and bis(2-methylphenyl)iodonium tetrafluoroborate (198 mg, 0.500 mmol, 1 eq) at 80 °C following purification using flash column chromatography eluting with pentane gave **7b** (97 mg, 0.332 mmol, 66%) as a white solid.

$R_f$  (pentane): 0.25;  $^1\text{H-NMR}$  (300 MHz,  $\text{CDCl}_3$ ):  $\delta$  2.16 (s, 3H,  $\text{CH}_3$ ), 7.37-7.51 (m, 4H,  $4 \times \text{ArH}$ ), 7.81 (dd,  $J = 7.1, 1.1$  Hz, 1H, ArH), 7.94 (t,  $J = 7.7$  Hz, 1H, ArH), 7.99 (s, 1H, ArH), 8.06 (t,  $J = 7.6$  Hz, 1H, ArH), 8.14 (s, 2H,  $2 \times \text{ArH}$ ), 8.19-8.27 (m, 3H,  $3 \times \text{ArH}$ );  $^{13}\text{C-NMR}$  (75 MHz,  $\text{CDCl}_3$ ):  $\delta$  20.3, 124.0, 124.4, 124.9, 125.0, 125.2, 125.2, 125.9, 126.0, 126.2, 127.4, 127.6, 127.7, 128.0, 130.2, 130.8, 131.0, 131.2, 131.5, 137.2, 139.3, 140.4.

Data is in accordance with the literature.<sup>12</sup>

#### 4-(4-Chlorophenyl)pyrene (7c)

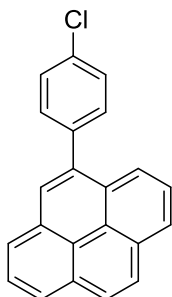

According to general procedure A: Reaction of pyrene (202 mg, 1.00 mmol, 2 eq) and (4-chlorophenyl)(2,4,6-triisopropylphenyl)iodonium tetrafluoroborate (264 mg, 0.500 mmol, 1 eq) at 100 °C following purification using flash column chromatography eluting with pentane gave **7c** (92 mg, 0.294 mmol, 59%) as a white solid.

$R_f$  (pentane): 0.26;  $^1\text{H-NMR}$  (400 MHz,  $\text{CDCl}_3$ ): 7.55 (d,  $J = 8.4$  Hz, 2H,  $2 \times \text{ArH}$ ), 7.61 (d,  $J = 8.4$  Hz, 2H,  $2 \times \text{ArH}$ ), 7.96 (t,  $J = 7.8$  Hz, 1H, ArH), 7.89 (s, 1H, ArH), 8.04 (t,  $J = 7.6$  Hz, 1H, ArH), 8.25-8.10 (m, 6H,  $6 \times \text{ArH}$ );  $^{13}\text{C-NMR}$  (100 MHz,  $\text{CDCl}_3$ ):  $\delta$  123.7,

124.4, 125.1, 125.2, 125.3, 125.5, 125.9, 126.3, 127.5, 127.8, 128.0, 128.8, 130.3, 130.7, 131.2, 131.5, 133.7, 138.2, 139.4.

Data is in accordance with the literature.<sup>12</sup>

### 9-Phenylphenanthrene (**8**)

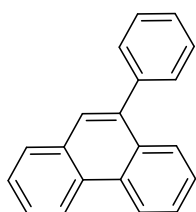

According to general procedure A: Reaction of phenanthrene (178 mg, 1.00 mmol, 2 eq) and diphenyliodonium tetrafluoroborate (184 mg, 0.500 mmol, 1 eq) at 70 °C following purification using flash column chromatography eluting with pentane gave a mixture (90:6:4, as determined using GC-FID) of three regioisomers (73 mg, 0.287 mmol, 57% total yield) as a white solid. 9-phenylphenanthrene **8** is the major isomer (65 mg, 0.256 mmol, 51% yield).

$R_f$  (pentane): 0.28;  $^1\text{H-NMR}$  (300 MHz,  $\text{CDCl}_3$ ): 7.44-7.71 (m, 9H,  $9 \times \text{ArH}$ ), 7.72 (s, 1H, ArH), 7.90-7.95 (d,  $J = 8.4$  Hz, 1H, ArH), 7.96 (dd,  $J = 8.3$  Hz,  $J = 1.2$  Hz, 1H, ArH), 8.75 (d,  $J = 8.4$  Hz, 1H, ArH), 8.81 (d,  $J = 8.3$  Hz, 1H, ArH);  $^{13}\text{C-NMR}$  (75 MHz,  $\text{CDCl}_3$ ): 122.7, 123.0, 126.58, 126.63, 126.7, 127.0, 127.1, 127.5, 127.6, 128.4, 128.8, 130.1, 130.2, 130.8, 131.3, 131.7, 138.9, 140.9.

Data is in accordance with the literature.<sup>13</sup>

### 5-Phenylacenaphthene (**9a**)

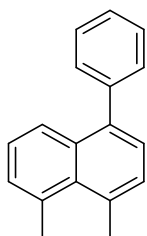

According to general procedure A: Reaction of acenaphthene (154 mg, 1.00 mmol, 2 eq) and diphenyliodonium tetrafluoroborate (184 mg, 0.500 mmol, 1 eq) at 70 °C following purification using flash column chromatography eluting with pentane gave **9a** (62 mg, 0.269 mmol, 54%) as a white solid.

$R_f$  (pentane): 0.30;  $^1\text{H-NMR}$  (300 MHz,  $\text{CDCl}_3$ ):  $\delta$  3.47 (s, 4H,  $2 \times \text{CH}_2$ ), 7.34 (d,  $J = 6.8$  Hz, 1H, ArH), 7.37 (d,  $J = 7.1$  Hz, 1H, ArH), 7.40-7.56 (m, 5H,  $5 \times \text{ArH}$ ), 7.60 (dd,  $J = 8.2$  Hz, 1.4 Hz, 2H,  $2 \times \text{ArH}$ ), 7.74 (d,  $J = 8.3$  Hz, 1H, ArH);  $^{13}\text{C-NMR}$  (75 MHz,  $\text{CDCl}_3$ ): 30.2, 30.7, 119.2, 119.5, 121.0, 127.1, 128.1, 128.5, 128.7, 129.9, 135.8, 139.7, 140.6, 145.7, 146.3.

Data is in accordance with the literature.<sup>14</sup>

### Ethyl 3-(1,2-dihydroacenaphthylen-5-yl)benzoate (**9b**)

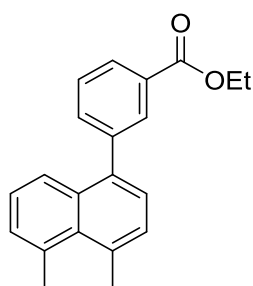

According to general procedure B: Reaction of acenaphthene (123 mg, 0.800 mmol, 2 eq) and bis(3-(ethoxycarbonyl)phenyl)iodonium tetrafluoroborate (205 mg, 0.400 mmol, 1 eq) at 100 °C following purification using flash column chromatography eluting with 2% EtOAc in pentane gave **9b** (53 mg, 0.176 mmol, 44%) as a yellow oil.

$R_f$  (2% EtOAc:pentane): 0.23.  $^1\text{H NMR}$  (300 MHz,  $\text{CDCl}_3$ )  $\delta$  1.41 (t,  $J = 7.1$  Hz, 3H,  $\text{CH}_3$ ), 3.46 (s, 4H,  $2 \times \text{CH}_2$ ), 4.41 (q,  $J = 7.1$  Hz, 2H,  $\text{CH}_2$ ), 7.30 – 7.40 (m, 2H,  $2 \times \text{ArH}$ ), 7.40 – 7.50 (m, 2H,  $2 \times \text{ArH}$ ), 7.53 – 7.69 (m, 2H,  $2 \times \text{ArH}$ ), 7.76 (dt,  $J = 7.6, 1.5$  Hz, 1H, ArH), 8.10 (dt,  $J = 7.8, 1.5$  Hz, 1H, ArH), 8.26 (t,  $J = 1.8$  Hz, 1H, ArH).  $^{13}\text{C NMR}$  (75 MHz,  $\text{CDCl}_3$ )  $\delta$  14.5, 30.2, 30.7, 61.2, 119.2, 119.6, 120.6, 128.3, 128.4, 128.5, 128.9, 129.7, 130.9, 130.9, 134.3, 134.7, 139.7, 140.8, 146.2, 146.4, 166.8.  $\nu_{\text{max}}$  (neat)/  $\text{cm}^{-1}$ : 644, 1030, 1084, 1107, 1320, 1249, 1300, 1716;  $m/z$  (ESI): Found  $[\text{M}+\text{H}]$ , 303, 1385.  $\text{C}_{21}\text{H}_{19}\text{O}_2$  requires  $M$ , 303, 1385.

### 5-(4-Bromophenyl)acenaphthene (**9c**)

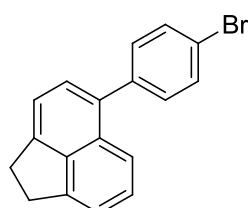

According to general procedure A: Reaction of acenaphthene (154 mg, 1.00 mmol, 2 eq) and bis(4-bromophenyl)iodonium tetrafluoroborate (263 mg, 0.500 mmol, 1 eq) at 100 °C following purification using flash column chromatography eluting with pentane gave **9c** (71 mg, 0.231 mmol, 47%) as a white solid.

$R_f$  (pentane): 0.26;  $^1\text{H}$  NMR (400 MHz,  $\text{CDCl}_3$ )  $\delta$  3.39 – 3.52 (bm, 4H, 2 x  $\text{CH}_2$ ), 7.34 (ddd,  $J$  = 6.6, 3.9, 1.3 Hz, 2H, 2 x ArH), 7.39 (d,  $J$  = 7.1 Hz, 1H, 1 x ArH), 7.42 – 7.48 (m, 3H, 3 x ArH), 7.59 – 7.69 (m, 3H, ArH);  $^{13}\text{C}$  NMR (101 MHz,  $\text{CDCl}_3$ )  $\delta$  30.18, 30.67, 119.24, 119.66, 120.59, 121.24, 128.39, 128.62, 129.59, 131.51, 131.53, 131.62, 134.40, 139.45, 139.67, 146.19, 146.43;  $m/z$  (APCI): Found ( $M$ ) 308.0194,  $\text{C}_{18}\text{H}_{13}\text{Br}$  requires  $M$ , 308.0195.  $\nu_{\text{max}}$  (neat)/  $\text{cm}^{-1}$ : 3063, 2940, 1605, 1485, 1069, 1007, 818, 779.

### 3-Phenylfluoranthene (10a)

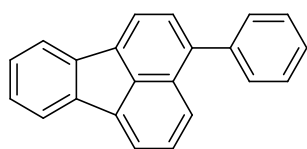

According to general procedure A: Reaction of fluoranthene (202 mg, 1.00 mmol, 2 eq) and diphenyliodonium tetrafluoroborate (184 mg, 0.500 mmol, 1 eq) at 80 °C following purification using flash column chromatography eluting with pentane gave a mixture (95:5, as determined using GC-FID) of two regioisomers (94 mg, 0.338 mmol, 68% total yield) as a yellow solid. 3-Phenylfluoranthene **10** is the major isomer (89 mg, 0.320 mmol, 64% yield).

$R_f$  (pentane): 0.20;  $^1\text{H}$ -NMR (400 MHz,  $\text{CDCl}_3$ ): 7.39-7.44 (m, 2H, 2 x ArH), 7.48 (td,  $J$  = 7.3 Hz, 1.4 Hz, 1H, ArH), 7.55 (t,  $J$  = 7.4 Hz, 2H, 2 x ArH), 7.60-7.67 (m, 4H, 4 x ArH), 7.93-8.02 (m, 5H, 5 x ArH);  $^{13}\text{C}$ -NMR (101 MHz,  $\text{CDCl}_3$ ): 120.2, 121.56, 121.63, 125.8, 127.5, 127.6, 127.7, 128.2, 128.5, 128.8, 130.4, 132.8, 136.4, 137.2, 139.3, 139.7, 139.9, 140.4.

Data is in accordance with the literature.<sup>15</sup>

### 3-(4-Fluorophenyl)fluoranthene (10b)

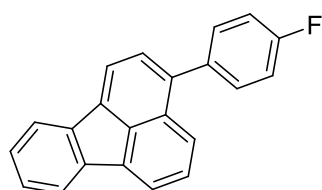

According to general procedure A: Reaction of fluoranthene (202 mg, 1.00 mmol, 2 eq) and bis(4-fluorophenyl)iodonium tetrafluoroborate (202 mg, 0.500 mmol, 1 eq) at 80 °C following purification using flash column chromatography eluting with pentane gave a mixture (97:3, as determined using GC-FID) of two regioisomers (70 mg, 0.236 mmol, 47% total yield) as a yellow solid. 3-(4-Fluorophenyl)fluoranthene **10** is the major isomer (68 mg, 0.223 mmol, 45 % yield).

## 4.0 Reaction Optimization Data

### 4.1 Solvent Screen

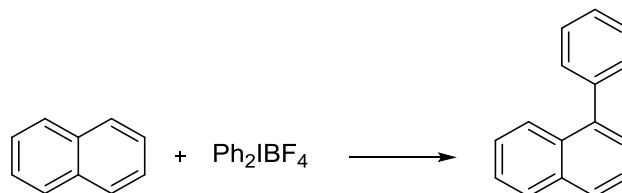

Reactions were performed exactly as described for the substrate scope.

| Solvent          | Yield % <sup>a</sup> | $\alpha:\beta^a$ |
|------------------|----------------------|------------------|
| EtOH             | Trace                | nd               |
| DME              | 46                   | 93:7             |
| THF              | 16                   | 88:12            |
| $\text{CHCl}_3$  | 23                   | 80:20            |
| MeCN             | 2                    | nd               |
| Heptane          | 4                    | nd               |
| EtOAc            | 10                   | 89:11            |
| Trifluoroethanol | 14                   | nd               |
| $\text{PhNO}_2$  | 3                    | nd               |
| DME:Dioxane 1:1  | 45                   | nd               |
| DME:Dioxane 9:1  | 46                   | nd               |
| DME:Dioxane 1:9  | 20                   | nd               |
| Triglyme         | 40                   | nd               |
| DME:Triglyme 1:1 | 43                   | nd               |
| NMP              | 0                    | nd               |
| DMF              | 0                    | nd               |
| DMSO             | 0                    | nd               |

Conditions: Naphthalene (0.1 mmol),  $\text{Ph}_2\text{IBF}_4$  (1.4 eq), Pd/C 5 mol%, solvent (0.5 mL) 70 °C, 22 h. <sup>a</sup>Determined by GC-FID. nd is not determined.

## 4.2 Naphthalene Optimization

| Deviation from standard conditions              | Yield % <sup>a</sup> | $\alpha:\beta$ <sup>a</sup> |
|-------------------------------------------------|----------------------|-----------------------------|
| Equivalents of Ph <sub>2</sub> IBF <sub>4</sub> |                      |                             |
| 0.5                                             | 56 <sup>b</sup>      | 92:8 <sup>c</sup>           |
| 1.0                                             | 43                   | 95:5 <sup>c</sup>           |
| 1.2                                             | 46                   | 94:6 <sup>c</sup>           |
| 1.4                                             | 46                   | 93:7 <sup>c</sup>           |
| Other                                           |                      |                             |
| 2.5 mol% Pd/C, 22 h                             | 62                   | 93:7                        |
| 2.5 mol% Pd/C, 16 h                             | 62                   | 92:7                        |
| 2.5 mol% Pd/C, 16 h, 1mL DME                    | 63                   | 95:5                        |

Standard conditions: Naphthalene (0.1 mmol), Ph<sub>2</sub>IBF<sub>4</sub> (0.5 eq), Pd/C 5 mol%, DME (0.5 mL), 80 °C, 22 h. <sup>a</sup>Determined by GC-FID. <sup>b</sup>Based on Ph<sub>2</sub>IBF<sub>4</sub> and is not determined. <sup>c</sup>70 °C.

## 4.3 Triphenylene Optimization

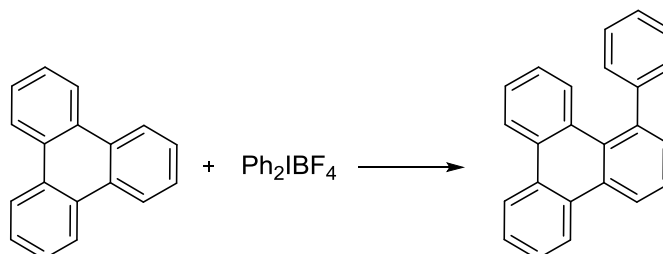

Reactions were performed exactly as described for the substrate scope.

| Deviation from standard conditions              | Yield % <sup>a</sup> |
|-------------------------------------------------|----------------------|
| None                                            | 40 <sup>b</sup>      |
| Temperature                                     |                      |
| 100 °C                                          | 49                   |
| Equivalents of PhI <sub>2</sub> BF <sub>4</sub> |                      |
| 1                                               | 23                   |
| 2                                               | 43                   |
| Catalyst loading                                |                      |
| 5 mol% Pd/C                                     | 60                   |
| 10 mol% Pd/C                                    | 61                   |
| Concentration                                   |                      |
| [0.2]                                           | 67                   |
| [0.05]                                          | 63                   |
| Reaction Time                                   |                      |
| 24 h                                            | 65                   |
| 30 h                                            | 68                   |
| 5 mol% Pd/C, [0.2], 24 h                        | 65 <sup>b</sup>      |

Standard conditions: Triphenylene (0.1 mmol), Ph<sub>2</sub>IBF<sub>4</sub> (2 eq), Pd/C 2.5 mol%, DME (1.0 mL), 80 °C, 16 h. <sup>a</sup>Determined by GC-FID. <sup>b</sup>Isolated yield

## 5.0 Additive Screen

We extensively screened additives in an attempt to increase both the yield and selectivity of reactions. In each case we observed either no effect or a detrimental effect on the reaction.

Additives screened:

### Organic Additives

TMEDA  
DMEDA  
18-Crown-6  
Ethylene Glycol  
Ethyldiamine  
DMS  
PhSSPh  
Tetramethylthiourea

### Acetates

LiOAc  
NaOAc  
KOAc  
CsOAc  
AgOAc

### Salts

LiCl  
NaCl  
KCl  
LiBr  
NaBr  
KBr  
CuCl  
CuCl<sub>2</sub>  
ZnCl<sub>2</sub>  
MgCl<sub>2</sub>  
CuBr  
MgBr<sub>2</sub>  
CuCl

### Oxidants

Cu(OAc)<sub>2</sub>

Cu(OAc)<sub>2</sub> · H<sub>2</sub>O

KS<sub>2</sub>O<sub>8</sub>  
Benzoquinone  
AgOAc  
Chloroanil  
DDQ  
PIDA  
Oxone  
tBuOOH  
Ditbutylperoxide

### Acids

Acetic acid  
TFA  
TsOH  
iPrCOOH  
PivOH  
Proline  
Acetic acid  
TFA  
TsOH  
iPrCOOH  
PivOH  
Proline  
**Amine Ligands**  
Pyridine  
2,6-Dimethylpyrazine  
Bipyridine  
Proline  
Phenanthroline  
Pyridine  
Pyrazine

Bipyridine

Proline  
Phenanthroline

### Lewis-acids

TMSOTf  
BF<sub>3</sub>·OEt<sub>2</sub>  
TMSCl

### Ammonium Salts

Bu<sub>4</sub>NCl  
Bu<sub>4</sub>NBr  
Bu<sub>4</sub>NI

### Bases

Cs<sub>2</sub>CO<sub>3</sub>  
CsOPiv  
F<sub>3</sub>CCO<sub>2</sub>Ag  
Li<sub>2</sub>CO<sub>3</sub>  
K<sub>2</sub>CO<sub>3</sub>  
Cs<sub>2</sub>CO<sub>3</sub>  
CsOPiv  
Li<sub>2</sub>CO<sub>3</sub>  
DBU  
DIPEA  
Et<sub>3</sub>N  
2,6-Tertbutylpyridine

### Phosphines

PPh<sub>3</sub>  
P(Cy)<sub>3</sub>  
P(OEt)<sub>3</sub>  
dppp  
dppe  
PPh<sub>3</sub>



## 6.0 Screening of Catalysts

### 6.1 Naphthalene

| Catalyst                                            | Yield % <sup>a</sup> | $\alpha:\beta$ <sup>a</sup> |
|-----------------------------------------------------|----------------------|-----------------------------|
| Pd/C (Heraeus)                                      | 63                   | 95:5                        |
| <b>'Homogeneous' Catalysts<sup>c</sup></b>          |                      |                             |
| Pd(dba) <sub>3</sub>                                | 23                   | 94:6                        |
| K <sub>2</sub> PdCl <sub>4</sub>                    | 8                    | 95:5                        |
| PdCl <sub>2</sub> (dppe)                            | 3                    | 82:18                       |
| PdCl <sub>2</sub> (PPh <sub>3</sub> ) <sub>3</sub>  | 9                    | 96:4                        |
| Pd(PPh <sub>3</sub> ) <sub>4</sub>                  | 43                   | 95:5                        |
| Pd(OAc) <sub>2</sub>                                | 52                   | 93:7                        |
| <b>Different Pd/C sources</b>                       |                      |                             |
| Sigma-Aldrich                                       | 49                   | 93:7                        |
| Acros Organics                                      | 7                    | 96:4                        |
| Johnson-Matthey                                     | 15                   | 95:5                        |
| Type 39                                             |                      |                             |
| Johnson-Matthey                                     | 46                   | 94:6                        |
| Type 58                                             |                      |                             |
| Johnson-Matthey                                     | 57                   | 94:6                        |
| Type 452                                            |                      |                             |
| Johnson-Matthey                                     | 33                   | 96:4                        |
| Type 478                                            |                      |                             |
| <b>Supported Pd catalysts</b>                       |                      |                             |
| Pd(OH) <sub>2</sub> /C                              | 2                    | nd                          |
| Pd/Fe <sub>3</sub> O <sub>4</sub>                   | 42                   | 88:12                       |
| Pd/Rh/C (4:1)                                       | 1                    | nd                          |
| Pd/Pt/C (4:1)                                       | 5                    | nd                          |
| Pd(OH) <sub>2</sub> /Fe <sub>3</sub> O <sub>4</sub> | 12                   | 96:4                        |
| Pd/Al <sub>2</sub> O <sub>3</sub>                   | 64                   | 96:4                        |
| <b>Supported metals</b>                             |                      |                             |
| Pt/C                                                | 0                    | nd                          |
| Pt/Fe <sub>3</sub> O <sub>4</sub>                   | 1                    | nd                          |
| Ir/CaCO <sub>3</sub>                                | 2                    | nd                          |
| Ir/C                                                | 2                    | nd                          |
| Rh/C                                                | 1                    | nd                          |
| Ru/C                                                | 0                    | nd                          |
| Ru/Fe <sub>3</sub> O <sub>4</sub>                   | 1                    | nd                          |
| Ru(OH) <sub>3</sub> /Fe <sub>3</sub> O <sub>4</sub> | 0                    | nd                          |
| Ni(OH) <sub>2</sub> /Fe <sub>3</sub> O <sub>4</sub> | 2                    | nd                          |
| Cu(OH) <sub>2</sub> /Fe <sub>3</sub> O <sub>4</sub> | 0                    | nd                          |
| Co(OH) <sub>2</sub> /Fe <sub>3</sub> O <sub>4</sub> | 1                    | nd                          |

Standard conditions: Naphthalene (0.2 mmol), Ph<sub>2</sub>IBF<sub>4</sub> (0.5 eq), Catalyst 2.5 mol%, DME (1 mL), 80 °C, 16 h. <sup>a</sup>Determined by GC-FID <sup>b</sup>Based on Ph<sub>2</sub>IBF<sub>4</sub>. <sup>c</sup>5 mol% catalyst. nd is not determined.

## 6.2 Triphenylene

| Catalyst                           | Yield % <sup>a</sup> |
|------------------------------------|----------------------|
| Pd/C (Heraeus)                     | 65 <sup>b</sup>      |
| <b>'Homogeneous' Catalysts</b>     |                      |
| Pd(dba) <sub>3</sub>               | 23                   |
| PdCl <sub>2</sub>                  | 16                   |
| Pd(PPh <sub>3</sub> ) <sub>4</sub> | 37                   |
| Pd(OAc) <sub>2</sub>               | 43                   |
| <b>Different Pd/C sources</b>      |                      |
| Acros Organics                     | 57                   |
| Johnson-Matthey                    | 49                   |
| Type 39                            |                      |
| Johnson-Matthey                    | 67                   |
| Type 58                            |                      |
| <b>Supported Pd catalysts</b>      |                      |
| Pd(OH) <sub>2</sub> /C             | 19                   |
| Pd/Fe <sub>3</sub> O <sub>4</sub>  | 60                   |
| Pd/Al <sub>2</sub> O <sub>3</sub>  | 72                   |

Standard conditions: Triphenylene (0.30 mmol), Ph<sub>2</sub>IBF<sub>4</sub> (0.5 eq), Catalyst 5 mol%, DME (0.5 mL), 100 °C, 24 h. <sup>a</sup>Determined by GC-FID <sup>b</sup>Isolated yield.

## 6.3 Discussion

The catalyst screen demonstrated that Pd/C (Heraeus) and Pd/Al<sub>2</sub>O<sub>3</sub> are equally proficient catalysts. As in our previous studies, it is also very clear that the source of Pd/C has an impact on yield. While homogeneous Pd(0) catalysts also show reactivity, Pd(II) catalysts (homogeneous or heterogeneous) are ineffective. Comparative studies of Pd/C, Pd/Al<sub>2</sub>O<sub>3</sub> and Pd(OAc)<sub>2</sub> provided some insight to the different reactivity of these systems.

| Catalyst                          | Hg poisoning | Hot filtration test | Standard reaction | 5 equiv. <b>1</b> | Reaction with [pMeOPhI(TRIP)]BF <sub>4</sub> | Reaction with [o-MePh <sub>2</sub> I]BF <sub>4</sub> | +Radical inhibitor <sup>b</sup> |
|-----------------------------------|--------------|---------------------|-------------------|-------------------|----------------------------------------------|------------------------------------------------------|---------------------------------|
| Pd/C (Heraeus)                    | het          | het                 | 63%               | 75%               | 54% <sup>a</sup>                             | 60% <sup>a</sup>                                     | 0%                              |
| Pd/Al <sub>2</sub> O <sub>3</sub> | het          | het                 | 64%               | 79%               | trace                                        | trace                                                | 0%                              |
| Pd(OAc) <sub>2</sub> <sup>c</sup> | het          | het                 | 52%               | 50%               | 30%                                          | nd                                                   | 0%                              |

Standard conditions: Naphthalene (**1**) (2 equiv.), iodonium salt (1 equiv.), catalyst (2.5 mol%), DME (0.1 M), 80 °C, 16 h. Yields given are GC-yields for the major regioisomer unless noted otherwise. *het* indicates that the results suggest a heterogeneous active catalytic species. <sup>a</sup>isolated yield. <sup>b</sup>TEMPO (1 equiv.), 1,4-benzoquinone (1 equiv.) were evaluated. <sup>c</sup>5 mol% of catalyst used.

Experiments were indicative of a heterogeneous catalytic species for each Pd source. A radical component to the reaction mechanism in each case was also apparent. While Pd/Al<sub>2</sub>O<sub>3</sub> showed excellent reactivity in the standard reaction, no product formation was observed with

electron rich iodonium salts. Interestingly, this is consistent with a Pd(II)/(IV) manifold as proposed by Sanford. ‘Poisoning’ reactions of electron-rich iodonium salts using Pd/C as catalyst by the addition of Pd/Al<sub>2</sub>O<sub>3</sub> did not occur, suggesting that the composition of the support alone does not account for the inhibition of the reaction. Pd(OAc)<sub>2</sub> generally proved less efficient than Pd/C, which may be accounted for by the reduced stability of the nanoparticles in the absence of a support.

## 7.0 Mechanistic Investigation

Studies were undertaken on both naphthalene and triphenylene in a number of instances, to confirm the same mechanism is in operation. If not considered essential, mechanistic studies were only undertaken on one substrate. More extensive studies were typically undertaken employing naphthalene for economic considerations.

### 7.1 Control reactions

| Deviation from standard conditions | Yield % <sup>a,b</sup> | $\alpha:\beta$ <sup>a</sup> |
|------------------------------------|------------------------|-----------------------------|
| None                               | 63                     | 95:5                        |
| No catalyst                        | 0                      | nd                          |
| Degassed solvent, Ar atmosphere    | 63                     | 95:5                        |

Standard conditions: Naphthalene (0.2 mmol), Ph<sub>2</sub>IBF<sub>4</sub> (0.5 eq), Catalyst 2.5 mol%, DME (1 mL), 80 °C, 16 h. <sup>a</sup>Determined by GC-FID. <sup>b</sup>Based on Ph<sub>2</sub>IBF<sub>4</sub>.

Experiments demonstrate catalyst is essential for reactivity and rule out air as an oxidant.

### 7.2 Heterogeneity Tests

#### 7.2.1 Naphthalene

##### Hg(0) poisoning test

Pd/C (2.5 mol %), Pd/Al<sub>2</sub>O<sub>3</sub> (2.5 mol %) and Pd(OAc)<sub>2</sub> (5 mol %) were all investigated.

As per general procedure A, two reactions of naphthalene (0.20 mmol, 2 eq.) (**1**) and [Ph<sub>2</sub>I]BF<sub>4</sub> (0.10 mmol) with the addition of mesitylene (20  $\mu$ L) as an internal standard were prepared, one as a control. Following reaction for 4.5 h at 80 °C the yields of both reactions were then determined by GC-FID. Elemental mercury (160 mg) was introduced to one reaction at 80 °C. Both reaction mixtures were continued with stirring at 80 °C for 22 h. Subsequent analysis of the reaction yields show the reaction is inhibited by the introduction of Hg(0).

| Catalyst             | Pd/C                       |              | Pd/Al <sub>2</sub> O <sub>3</sub> |              | Pd(OAc) <sub>2</sub> |              |
|----------------------|----------------------------|--------------|-----------------------------------|--------------|----------------------|--------------|
|                      | Yield (4,5 h) <sup>a</sup> | Yield (22 h) | Yield (4,5 h)                     | Yield (22 h) | Yield (4,5 h)        | Yield (22 h) |
| Control reaction     | 19 %                       | 51 %         | 4 %                               | 67 %         | 35 %                 | 51 %         |
| Hg(0) poisoning test | 17 %                       | 17 %         | 3 %                               | 3 %          | 34 %                 | 36 %         |

<sup>a</sup>Yields determined by GC of crude reaction mixture, with mesitylene as internal standard.

### Hot filtration test

Pd/C (2.5 mol %), Pd/Al<sub>2</sub>O<sub>3</sub> (2.5 mol %) and Pd(OAc)<sub>2</sub> (5 mol %) were all investigated.

As per general procedure A, reaction of naphthalene (0.20 mmol, 2 eq.) (**1**) and [Ph<sub>2</sub>I]BF<sub>4</sub> (0.10 mmol) for 4 h at 80 °C was undertaken. The reaction was then directly filtered through a preheated (80 °C) pad of Celite into a fresh vessel containing [Ph<sub>2</sub>I]BF<sub>4</sub> (0.10 mmol, 1 eq). The reaction mixture was then analysed using GC prior to heating for an additional 22 h at 80 °C. Subsequent analysis showed no reaction progress following filtration.

| Catalyst            | Pd/C                       |              | Pd/Al <sub>2</sub> O <sub>3</sub> |              | Pd(OAc) <sub>2</sub> |              |
|---------------------|----------------------------|--------------|-----------------------------------|--------------|----------------------|--------------|
|                     | Yield (4,5 h) <sup>a</sup> | Yield (22 h) | Yield (4,5 h)                     | Yield (22 h) | Yield (4,5 h)        | Yield (22 h) |
| Control reaction    | 15 %                       | 58 %         | 4 %                               | 67 %         | 35 %                 | 51 %         |
| Hot filtration test | 20 %                       | 20 %         | 4 %                               | 4 %          | 26 %                 | 27 %         |

<sup>a</sup>Yields determined by GC of crude reaction mixture, with mesitylene as internal standard.

The hot filtration test is a widely applied method to investigate the nature of the active catalytic species. Following filtration of the reaction mixture to remove any heterogeneous catalyst, should reaction continue this would be indicative of leached (homogeneous) active catalytic species.

### 3-Phase tests

#### Preparation of compounds

##### 2-(Naphthalen-2-yl)ethanol

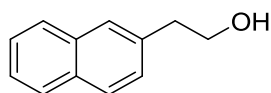

To a solution of 2-vinylnaphthalene (1.00 g, 6.50 mmol, 1 eq) in THF (5 mL) at 0 °C, was added BH<sub>3</sub>-THF (1 M, 3.25 mL, 3.25 mmol, 0.50 eq) slowly over 5 min. The solution was stirred at room temperature for 45 min. After this time, the reaction was cooled to 0 °C and NaOH (3 M, 2 mL) was added, followed by the slowly addition of H<sub>2</sub>O<sub>2</sub> (30 % solution, 2 mL). The resulting mixture was heated at reflux for 1 h. The mixture was poured into cold water and extracted with ethyl acetate (3 × 15 mL). The organic phase was washed with HCl 1 M (30 mL), dried with MgSO<sub>4</sub> and concentrated *in vacuo*. Purification with SiO<sub>2</sub> gel gave the target compound (516 mg, 3.00 mmol, 46%) as a white solid.

R<sub>f</sub> (40 % Ethyl acetate in pentane): 0.30. <sup>1</sup>H NMR (400 MHz, CDCl<sub>3</sub>) δ 1.59 (br. s., 1H, OH), 3.04 (t, *J* = 6.5 Hz, 2H, CH<sub>2</sub>), 3.95 (t, *J* = 6.5 Hz, 2H, CH<sub>2</sub>OH), 7.37 (dd, *J* = 8.4, 1.8 Hz, 1H, 1 × ArH), 7.42 – 7.51 (m, 2H, 2 × ArH), 7.69 (s, 1H, ArH), 7.82 (ddd, *J* = 10.3, 6.2, 2.8 Hz, 3H, 3 × ArH); <sup>13</sup>C-NMR (101 MHz, CDCl<sub>3</sub>) δ 136.1, 133.7, 132.4, 128.4, 127.8, 127.6, 127.6, 127.5, 126.2, 125.6, 63.7, 39.5. Data is in accordance with the literature.<sup>16</sup>

##### 2-(2-Naphthyl)ethyl tosylate

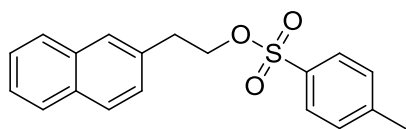

2-(2-Naphthyl)ethyl tosylate was synthesized according to the procedure of Glorius *et al.*<sup>17</sup> Reaction of 2-(naphthalen-2-yl)ethanol (510 mg, 2.96 mmol, 1 eq), tosyl chloride (677 mg, 3.55 mmol, 1.2 eq) and triethylamine (0.66 mL, 4.74 mmol, 1.6 eq) gave the target compound (725 mg, 2.22 mmol, 76%) as a colorless oil.

R<sub>f</sub> (40 % Ethyl acetate in pentane): 0.65. <sup>1</sup>H NMR (400 MHz, CDCl<sub>3</sub>) δ 2.34 (s, 3H, CH<sub>3</sub>), 3.11 (t, *J* = 6.8 Hz, 2H, CH<sub>2</sub>), 4.31 (t, *J* = 6.8 Hz, 2H, CH<sub>2</sub>), 7.11 (d, *J* = 8.0 Hz, 2H, 2 × ArH), 7.21 (dd, *J* = 8.5, 1.7 Hz, 1H, ArH), 7.50 – 7.43 (m, 2H, 2 × ArH), 7.52 (d, *J* = 1.6 Hz, 1H, ArH), 7.60 (d, *J* = 8.0 Hz, 2H, 2 × ArH), 7.71 (d, *J* = 8.5 Hz, 2H, 2 × ArH), 7.84 – 7.77 (m,

$^1\text{H}$ , ArH);  $^{13}\text{C}$  NMR (101 MHz,  $\text{CDCl}_3$ )  $\delta$  21.7, 35.6, 70.8, 125.8, 126.3, 127.2, 127.6, 127.6, 127.7, 127.9, 128.4, 129.8, 132.5, 132.9, 133.6, 133.9, 144.7. GC-MS (EI):  $t_{\text{R}}$  (50\_40): 12.5 min;  $m/z$  (%): 326, 154, 141, 115, 91.

### Immobilization of 2-(2-naphthyl)ethyl tosylate on Wang Resin

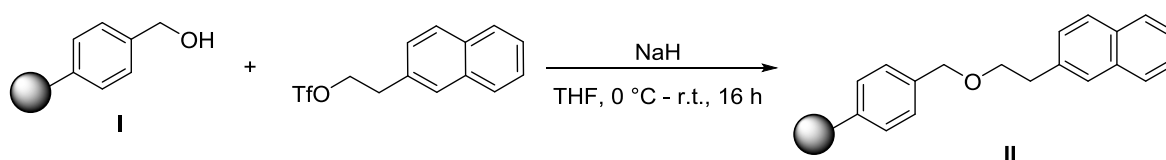

Commercially available Wang-resin (100-200 mesh, 1.0-1.5 mmol/g OH loading, 1% crosslinked with divinylbenzene) was washed with  $\text{CH}_2\text{Cl}_2$  and MeOH and dried *in vacuo* overnight prior to use. To a suspension of Wang-resin I (500 mg, 0.750 mmol, 1.0 eq) in THF (2 mL) at 0 °C was added NaH (57 wt% in mineral oil, 93 mg, 2.2 mmol, 2.9 eq) and the mixture stirred for 2 h. Then, 2-(2-naphthyl)ethyl tosylate (621 mg, 2.20 mmol, 2.9 eq) dissolved in THF (2 mL), was added dropwise and the reaction mixture was stirred at room temperature for 16 h. The reaction mixture was quenched with  $\text{H}_2\text{O}$  (5 mL), filtered and the residue consecutively washed with  $\text{CH}_2\text{Cl}_2$ , MeOH,  $\text{H}_2\text{O}$ , MeOH and  $\text{CH}_2\text{Cl}_2$  (30 mL each). The resin was dried *in vacuo* to afford Wang-resin II.

To determine the loading, 50 mg of Wang-resin II was stirred in TFA/ $\text{CH}_2\text{Cl}_2$  3:1 (8 mL) at room temperature for 2 h. The reaction mixture was filtered, the residue washed with  $\text{CH}_2\text{Cl}_2$  (20 mL) and the filtrate washed with saturated aqueous  $\text{NaHCO}_3$  (2x 30 mL), dried over  $\text{MgSO}_4$  and the solvent removed *in vacuo*. The mass of the isolated material allowed for determination of the loading of the Wang resin. The material was analysed by GCMS and gave a loading of 0.45 mmol/g.

### 3-Phase tests

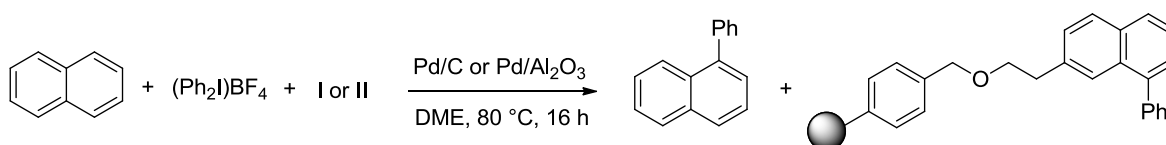

Reactions were undertaken as per general procedure A, substituting naphthalene (**1**) for Wang-resin (**II**). To determine whether the immobilized substrate had reacted under the given

reaction conditions, the reaction residue was washed, then treated with TFA/ CH<sub>2</sub>Cl<sub>2</sub> (3:1) as reported (vide supra). Products were analysed by GCMS.

To address different scenarios of possible catalyst leaching, several variants of 3-phase tests have been under taken:

*a) Pd/C (2,5 % mol) as catalyst*

1. The standard reaction was undertaken in the presence of unmodified Wang-resin (I, 200 mg) to evaluate possible reaction inhibition.

**Result:** The reaction proceeded normally.

2. Supported naphthalene (**II**) was used in place of naphthalene and the reaction evaluated as normal.

**Result:** No cleavage of naphthalene was detected. No product detected in solution or in the solid support.

Experiment 2 strongly suggests that no active homogenous Pd species are generated under these reaction conditions. It also demonstrates that the supported naphthalene is stable to the reaction conditions.

In order to confirm the reactivity of alkyl naphthalene derivatives, 2-ethylnaphthalene was employed under the standard reaction conditions and the expected arylated product was obtained.

3. The standard reaction of **1** and [Ph<sub>2</sub>I]BF<sub>4</sub> was undertaken in the presence of polymer supported naphthalene (**II**). **Result:** Reaction product was observed in solution but not on solid support.

This experiment demonstrates that the active catalyst species is present in solution as reaction is observed. The absence of product formation on the support strongly suggests that the active species is heterogeneous in nature. This experiment is performed to rule out a synergistic effect of naphthalene and the arylodonium salt being required to generate an active homogeneous catalytic species.

*b) Pd/Al<sub>2</sub>O<sub>3</sub> (2,5 mol %) as catalyst*



Reactions identical to those described for Pd/C were undertaken, and were again strongly indicative of the active species being heterogeneous in nature.

## 7.2.2 Triphenylene

### Hg(0) poisoning test

As per general procedure B, triphenylene (**4**) (0.150 mmol) and [Ph<sub>2</sub>I]BF<sub>4</sub> with the addition of mesitylene (14  $\mu$ L) as an internal standard was prepared. Following reaction for 1 h at 100 °C the yield was determined by GC-FID. Elemental mercury (80 mg) was introduced to the reaction at ~100 °C and the reaction then stirred at 100 °C for an additional 22 h. Subsequent analysis of the reaction yield showed the reaction is inhibited by the introduction of Hg(0).

### Hot filtration test

As per general procedure B, triphenylene (**4**) (0.150 mmol) and [Ph<sub>2</sub>I]BF<sub>4</sub> with the addition of mesitylene (14  $\mu$ L) as an internal standard was prepared. Following reaction for 1 h at 100 °C the reaction was then directly filtered through a preheated (80 °C) pad of Celite into a fresh vessel containing [Ph<sub>2</sub>I]BF<sub>4</sub> (1 eq). The reaction mixture was then analysed using GC prior to heating for an additional 22 h at 100 °C. Subsequent analysis showed no reaction progress following filtration.

|                     | Yield % <sup>a</sup><br>1h | Yield % <sup>a</sup><br>23h |
|---------------------|----------------------------|-----------------------------|
| Hg poisoning test   | 24                         | 24                          |
| Hot filtration test | 22                         | 21                          |

<sup>a</sup>Yields determined by GC of crude reaction mixture, with mesitylene as internal standard.

## 7.3 Kinetic experiments

### 7.3.1 Kinetic Profile

Reactions performed as per general procedure A. Each time point is a separate experiment and results are the average of two experiments.

| Reaction time<br>h | Yield % |
|--------------------|---------|
| 2                  | 2       |
| 4                  | 7       |
| 6                  | 23      |
| 8                  | 41      |
| 10                 | 52      |
| 12                 | 58      |
| 14                 | 62      |
| 20                 | 62      |

<sup>a</sup>Yields determined by GC of crude reaction mixture, with mesitylene as internal standard.

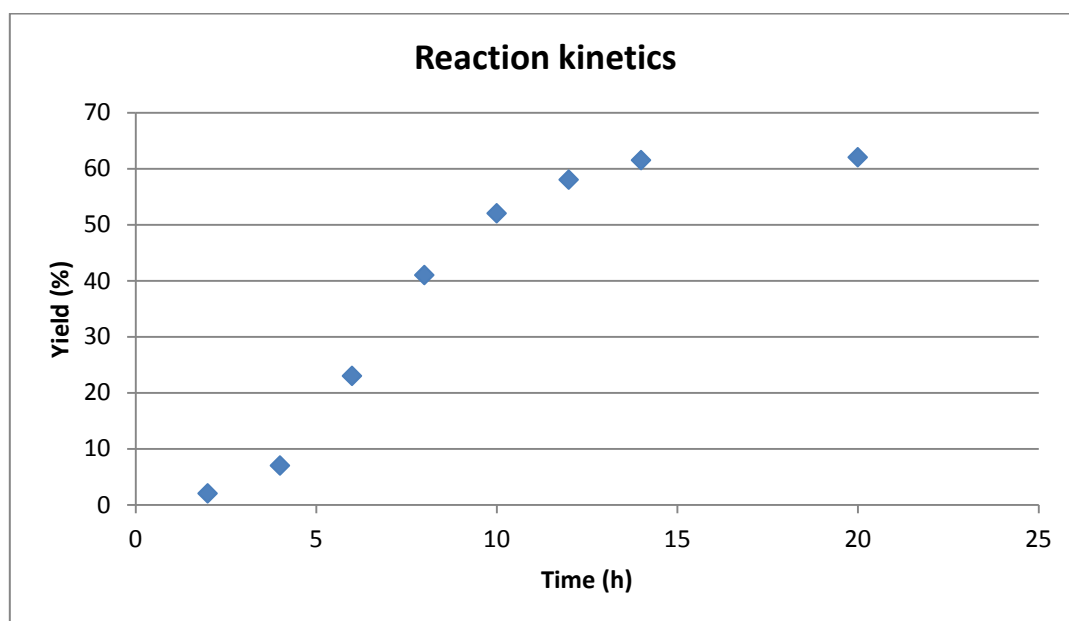

### 7.3.2 Kinetic profile with preactivation of catalyst

As per general procedure A:  $\text{PhI}_2\text{BF}_4$  (0.100 mmol, 1 equiv) and Pd/C (2.5 % mol) in DME (1.0 mL) were heated at 80 °C for 2h. Naphthalene (2 equiv) was then added to the reaction mixture and stirring at 80 °C continued. Aliquots were taken to determine the yield of reaction. Results are the average of 3 different experiments.

| Reaction time<br>h | Yield % |
|--------------------|---------|
| 0.5                | 4       |
| 1                  | 12      |
| 1.5                | 18      |
| 2                  | 23      |
| 3                  | 30      |
| 4                  | 33      |
| 5                  | 35      |
| 6                  | 40      |
| 9                  | 18      |
| 22                 | 52      |

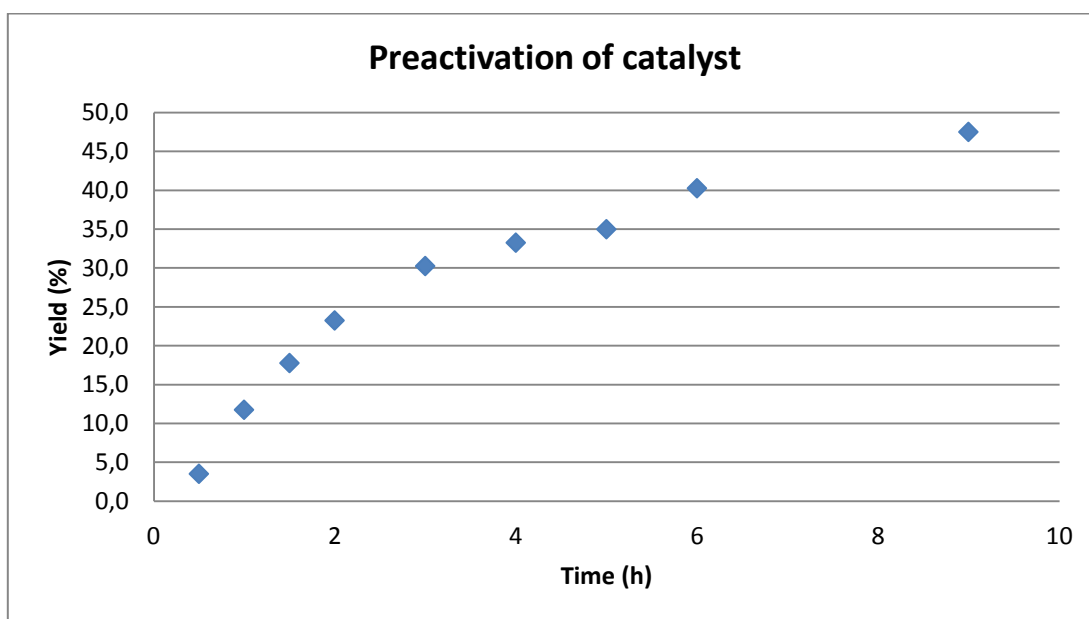

Preheating the catalyst in the absence of an oxidant for 2 h prior to the introduction of the reagents did not negate the induction period. After the addition of the reagents, the yield of the reaction was determined to be 4% after 4 h. This is consistent with the kinetic profile of the standard reaction.

### 7.3.3 Pd(OAc)<sub>2</sub> induction period

According to general procedure A: Reaction of naphthalene (**2**) (26 mg, 0.200 mmol, 2 eq) and diphenyliodonium tetrafluoroborate (37 mg, 0.100 mmol, 1 eq) with Pd(OAc)<sub>2</sub> (1 mg, 5 mol%) at 80 °C was undertaken. Aliquots were taken hourly and yields determined by GC-FID.

| Reaction time<br>h | Yield % |
|--------------------|---------|
| 1                  | 0       |
| 2                  | 5       |
| 3                  | 6       |
| 4                  | 8       |
| 5                  | 13      |
| 6                  | 17      |

<sup>a</sup>Yields determined by GC of crude reaction mixture, with mesitylene as internal standard.

### 7.3.4 Determination of KIE

Via initial rate constants:

As per general procedure A, reaction of naphthalene (**1**) (0.200 mmol, 2.0 eq) or naphthalene-*d*<sub>8</sub> (*d*-**1**) (0.200 mmol, 2.0 equiv.), with [Ph<sub>2</sub>I]BF<sub>4</sub> (37 mg, 0.100 mmol, 1.0 equiv.) was undertaken.

The KIE was determined for the reaction time between 2 h and 4 h. The yields were determined by GC using mesitylene as internal standard. The initial rate constants were calculated:

$$k_H = 6.40 \text{ mg} \cdot \text{mL} \cdot \text{h}^{-1}$$

$$k_D = 11.80 \text{ mg} \cdot \text{mL} \cdot \text{h}^{-1}$$

$$k_H/k_D = 0.54$$

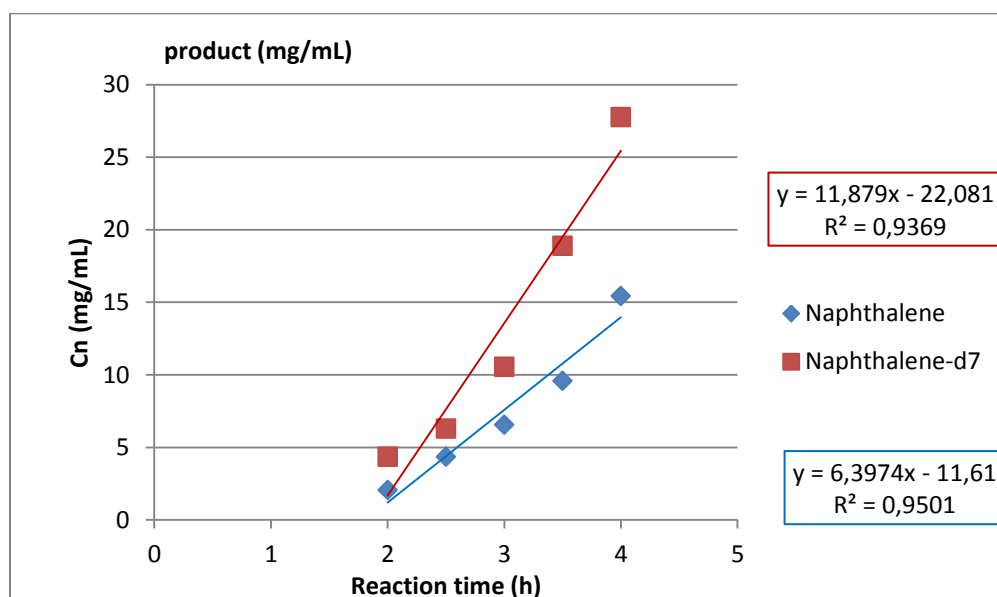

Initial rates of standard reaction with naphthalene (blue) and naphthalene-d<sub>8</sub> (red)

### 7.3.5 Competition experiment

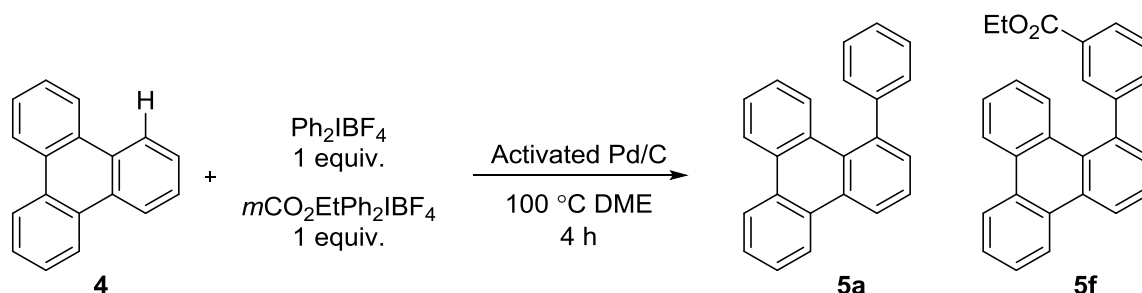

To ensure formation of the active catalyst did not consume any reagent and affect the results, Pd/C (21 mg, 5 mol%) was pre-treated with PIDA (13 mg, 20 mol%) at 100 °C in DME (0.5 ml) for 2 h to form the active catalytic species. To the active catalyst solution was then added triphenylene (**4**) (46 mg, 0.200 mmol, 1 eq)  $\text{PhI}_2\text{BF}_4$  (74 mg, 0.200 mmol, 1 eq) and  $m\text{-CO}_2\text{EtPh}_2\text{IBF}_4$  (102 mg, 0.200 mmol, 1 eq) and the reaction stirred for 4 h. Yields were determined at 2 h and 4 h using GC-FID and indicated reaction of  $\text{PhI}_2\text{BF}_4$  is more rapid than  $m\text{-CO}_2\text{EtPh}_2\text{IBF}_4$ .

| Product   | Yield % <sup>a</sup> | Yield % <sup>a</sup> |
|-----------|----------------------|----------------------|
|           | 2h                   | 3h                   |
| <b>5a</b> | 8                    | 19                   |
| <b>5d</b> | 3                    | 10                   |

<sup>a</sup>Yields determined by GC of crude reaction mixture, mesitylene as internal standard.

## 7.4 Reaction Orders

### 7.4.1 Order in palladium

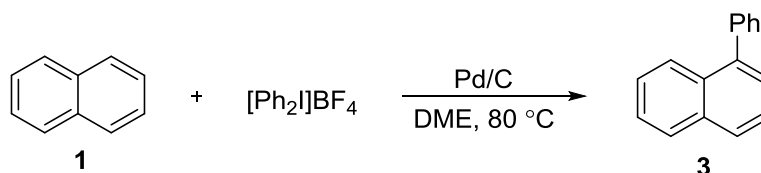

Reactions were undertaken as per general procedure A. Catalyst loadings of 2.5 mg, 5 mg, 10 mg and 20 mg were undertaken. The induction period was established to be dependent on catalyst concentration, hence preliminary experiments were undertaken to establish the duration of the induction period and hence establish when measurement should begin. Initial reaction rates were determined by measuring the rate of product formation between ~3 and ~12 % yield, with a minimum of 5 data points. Plotting the initial rates (gradient) vs. catalyst

amount showed a linear correlation indicative of 1<sup>st</sup> order reaction kinetics. Surprisingly, no product formation was observed after 16 h with 2.5 mg of catalyst.

| <b>Pd/C loading</b> | <b>Yield (3a) %<sup>a</sup></b> |              |              |
|---------------------|---------------------------------|--------------|--------------|
|                     | <b>5 mg</b>                     | <b>10 mg</b> | <b>20 mg</b> |
| Time min            |                                 |              |              |
| 90                  |                                 |              | 3.4          |
| 105                 |                                 |              | 5.1          |
| 120                 | 3.3                             | 4.0          | 7.0          |
| 135                 |                                 | 5.5          | 12.5         |
| 150                 | 5.9                             | 6.9          | 14.5         |
| 165                 |                                 | 9.1          |              |
| 180                 | 7.7                             | 11.1         |              |
| 210                 | 9.8                             |              |              |
| 240                 | 12.0                            |              |              |

<sup>a</sup>Yields determined by GC of crude reaction mixture, with mesitylene as internal standard.

| <b>Pd/C loading</b> | <b>mg/mL (3a)</b> |              |              |
|---------------------|-------------------|--------------|--------------|
|                     | <b>5 mg</b>       | <b>10 mg</b> | <b>20 mg</b> |
| Time min            |                   |              |              |
| 90                  |                   |              | 0.8          |
| 105                 |                   |              | 1.2          |
| 120                 | 0.8               | 1.0          | 1.7          |
| 135                 |                   | 1.3          | 3.0          |
| 150                 | 1.4               | 1.7          | 3.5          |
| 165                 |                   | 2.2          |              |
| 180                 | 1.9               | 2.7          |              |
| 210                 | 2.4               |              |              |
| 240                 | 2.9               |              |              |

**Plot of Concentration (2a) vs Time**

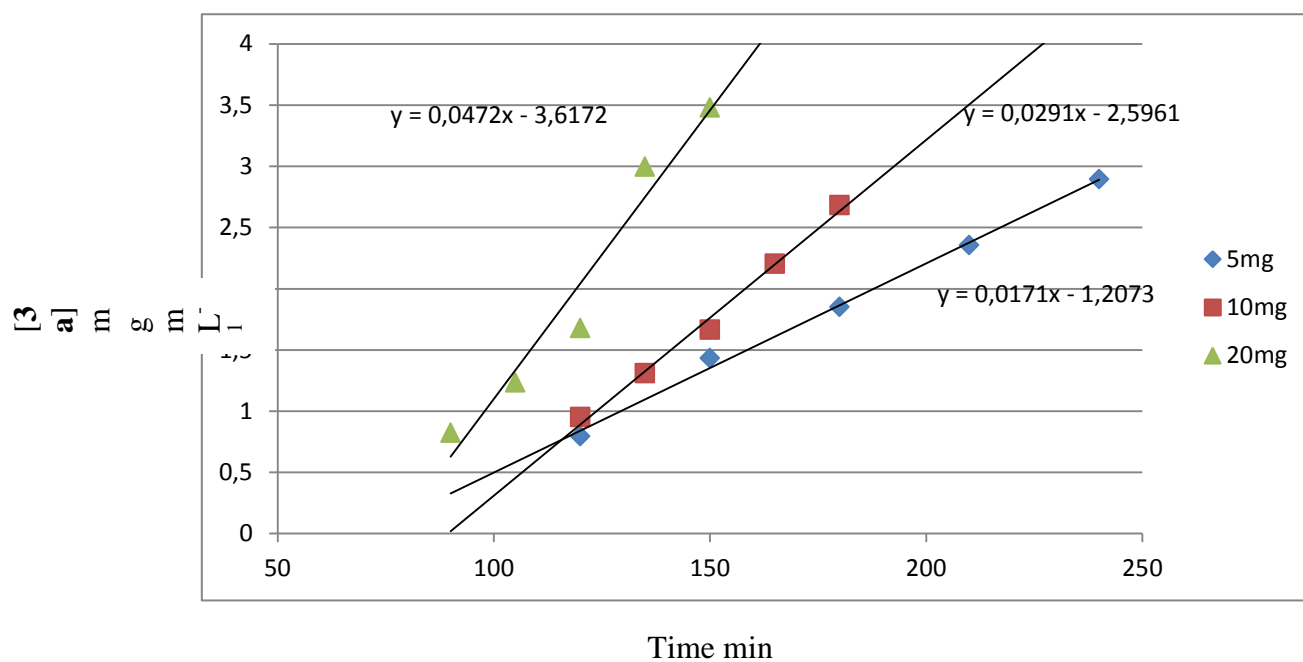

**Plot of Initial Rate vs Catalyst Loading**

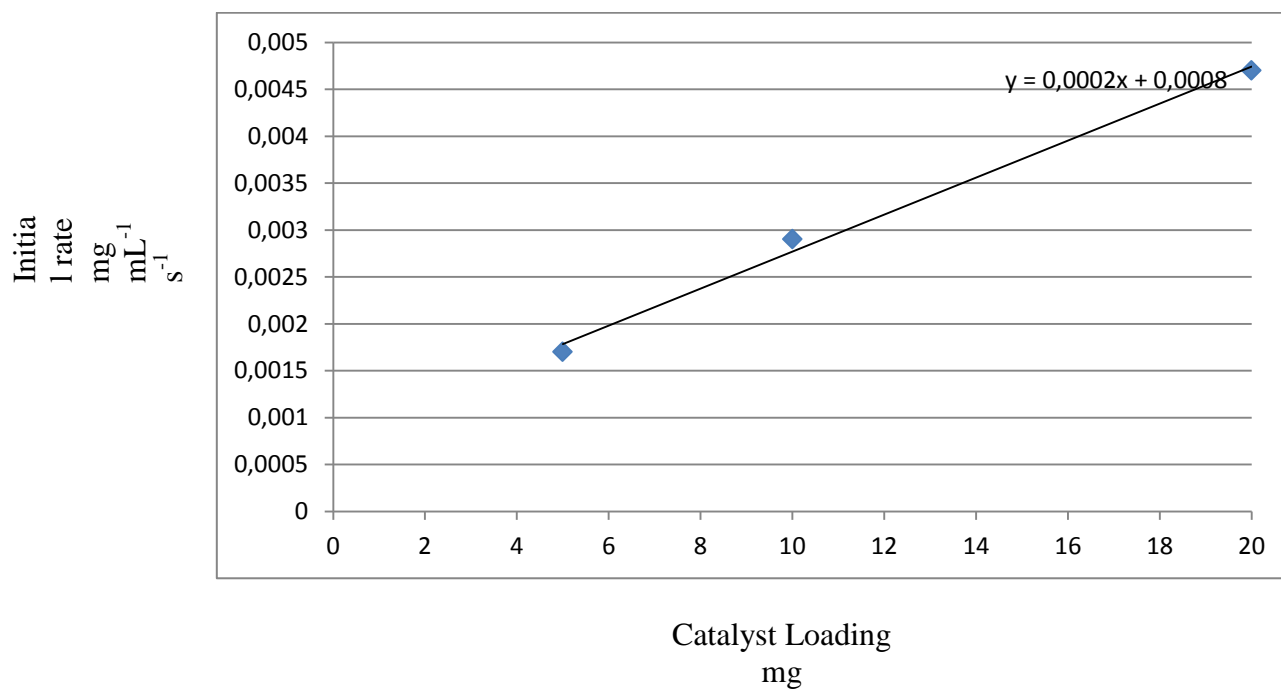

### 7.4.2 Order in naphthalene

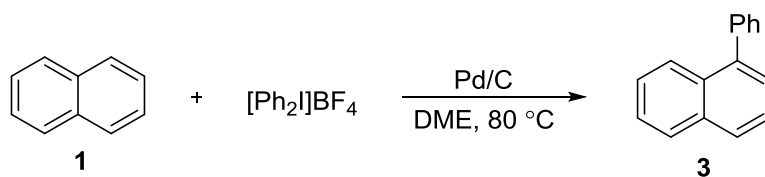

Reactions were undertaken as per general procedure A. Naphthalene concentrations of 0.10, 0.20, 0.25, 0.30 were undertaken. Initial reaction rates were determined by measuring the rate of product formation between ~4 and ~30 % yield, with a minimum of 5 data points. Plotting the initial rates (gradient) vs. concentration of naphthalene showed an absence of correlation indicative of 0 order reaction kinetics.

**Plot of concentration (1) vs time**

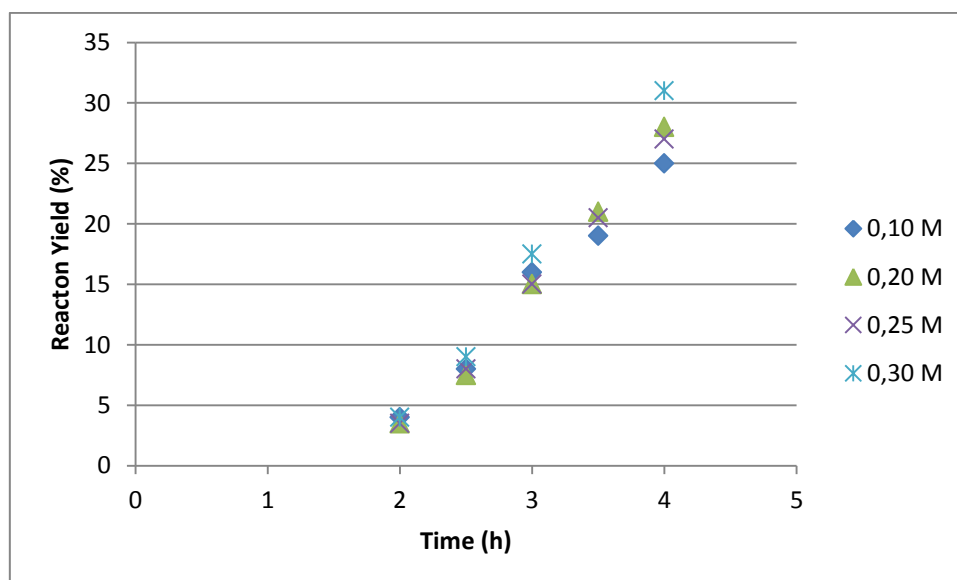

**Plot of initial rate vs naphthalene (1) concentration**

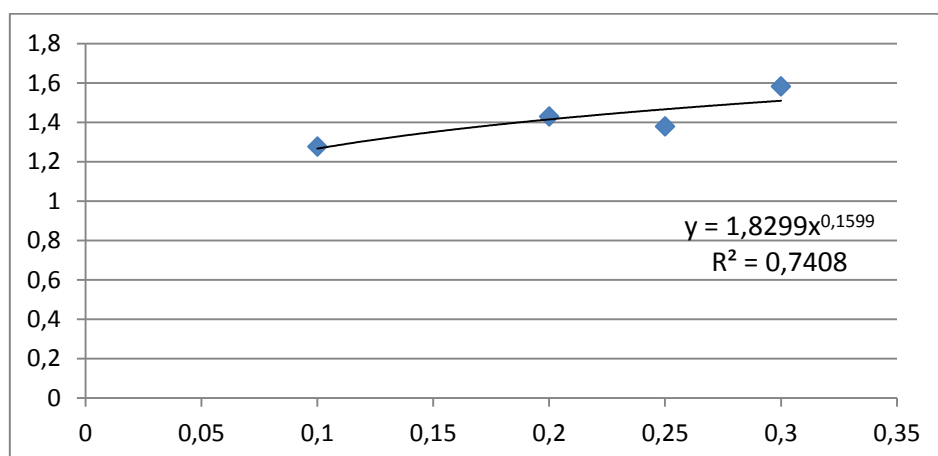



## 7.5 Reaction of $\text{PhI}_2\text{BF}_4$ in the absence of PAH

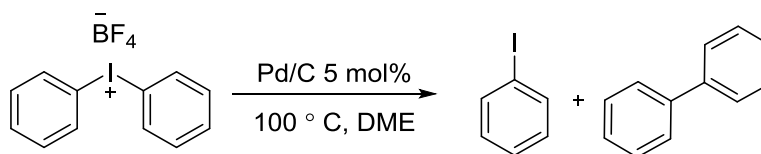

$\text{PhI}_2\text{BF}_4$  (28 mg, 0.076 mmol) and  $\text{Pd/C}$  (8 mg, 5 mol%) were heated at  $100\text{ }^\circ\text{C}$  in  $\text{DME}$  (0.25 mL).

|     | Yield % <sup>a</sup><br>2 h | Yield % <sup>a</sup><br>5 h | Yield % <sup>a</sup><br>22 h |
|-----|-----------------------------|-----------------------------|------------------------------|
| PhI | 80                          | 80                          | 80                           |

<sup>a</sup>Yields determined by GC of crude reaction mixture, mesitylene as internal standard.

## 7.6 Deuteration experiments

$\text{Pd/C}$  (5 mol%) was pre-treated with PIDA (20 mol%) at  $100\text{ }^\circ\text{C}$  in  $\text{DME}$  (0.25 mL) for 2 h to form the active catalytic species.

Naphthalene (**1**) (0.150 mmol) and pre-activated  $\text{Pd/C}$  (5 mol%) and  $\text{MeOD-d}_4$  (14.5  $\mu\text{L}$ ) were stirred overnight at  $80\text{ }^\circ\text{C}$  in  $\text{DME}$  (0.25 mL). Subsequent NMR analysis indicated no deuterium incorporation.

Triphenylene (**4**) (0.150 mmol) and pre-activated  $\text{Pd/C}$  (5 mol%) and  $\text{MeOD-d}_4$  (14.5  $\mu\text{L}$ ) were stirred overnight at  $100\text{ }^\circ\text{C}$  in  $\text{DME}$  (0.25 mL). Subsequent NMR analysis indicated no deuterium incorporation.

## 8.0 Failed or unselective reactions

Only oxidation product observed

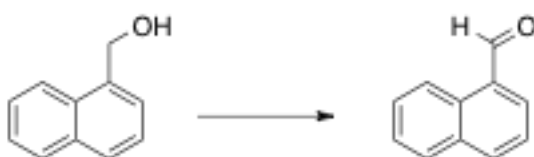

Reactive but unselective substrates

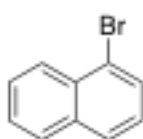

3:2 mixture  
of products

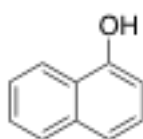

78:22 mixture  
of products

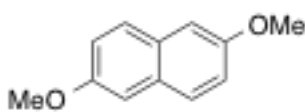

~1:1 mixture  
of products

No product formation/trace reaction observed

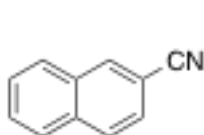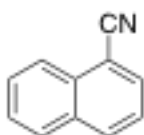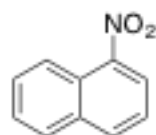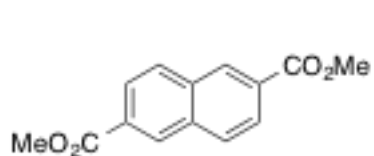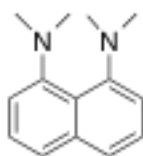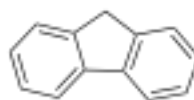

Reaction conditions as general procedure A.

## 9.0 NMR Spectra

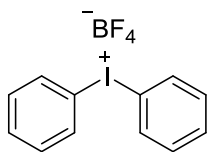

Diphenyliodonium tetrafluoroborate

<sup>1</sup>H-NMR (300 MHz, DMSO-d<sub>6</sub>)

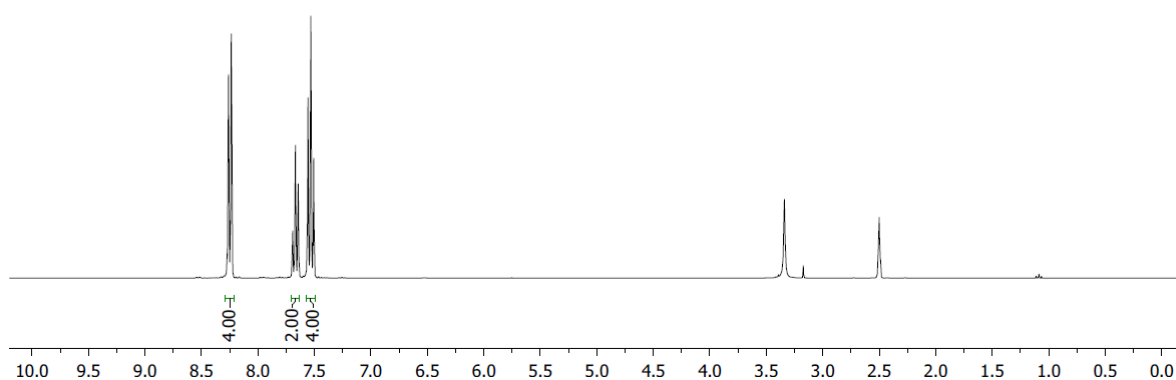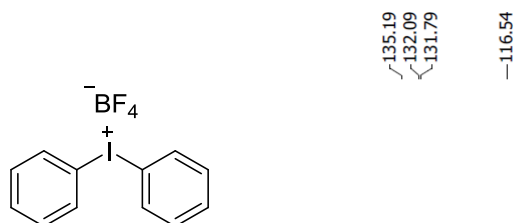

Diphenyliodonium tetrafluoroborate

<sup>13</sup>C-NMR (75 MHz, DMSO-d<sub>6</sub>)

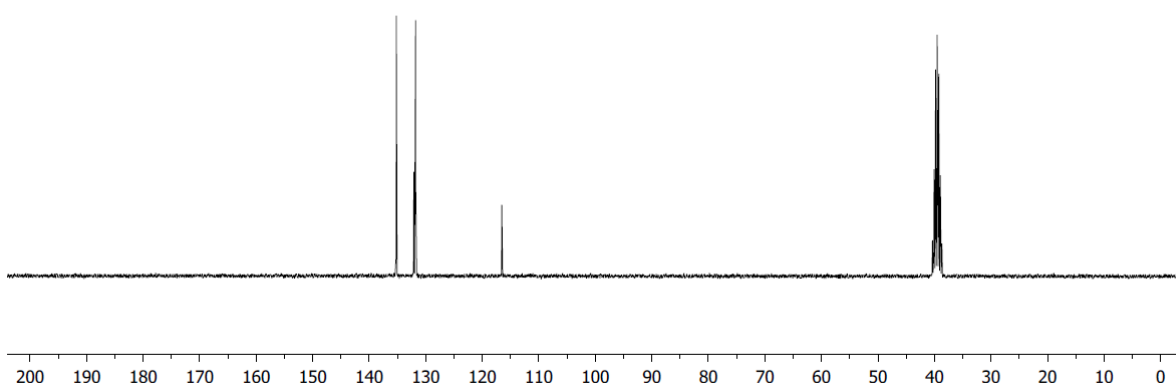

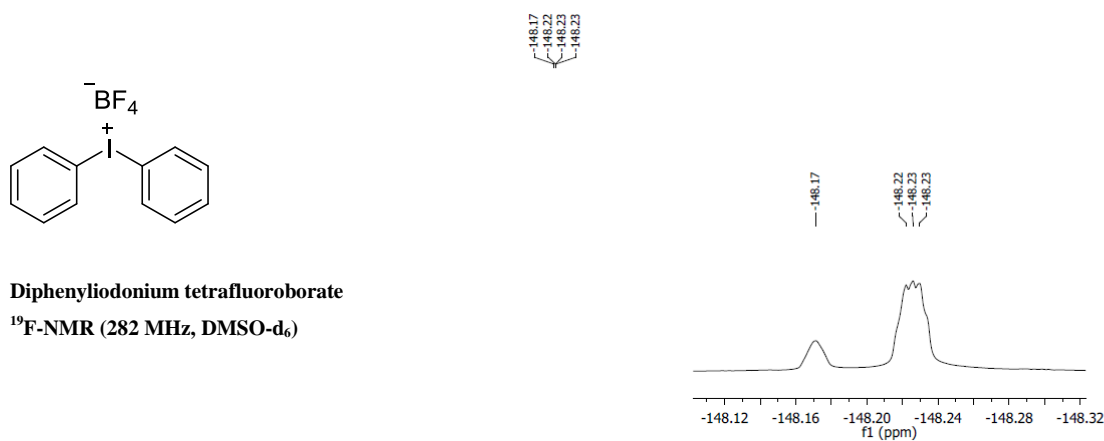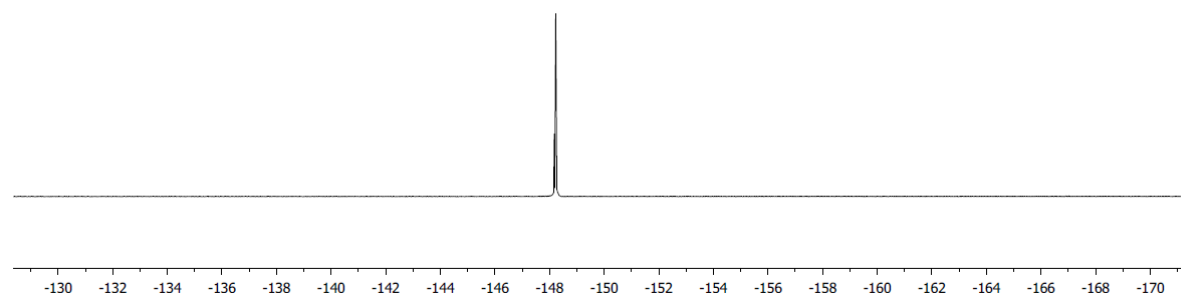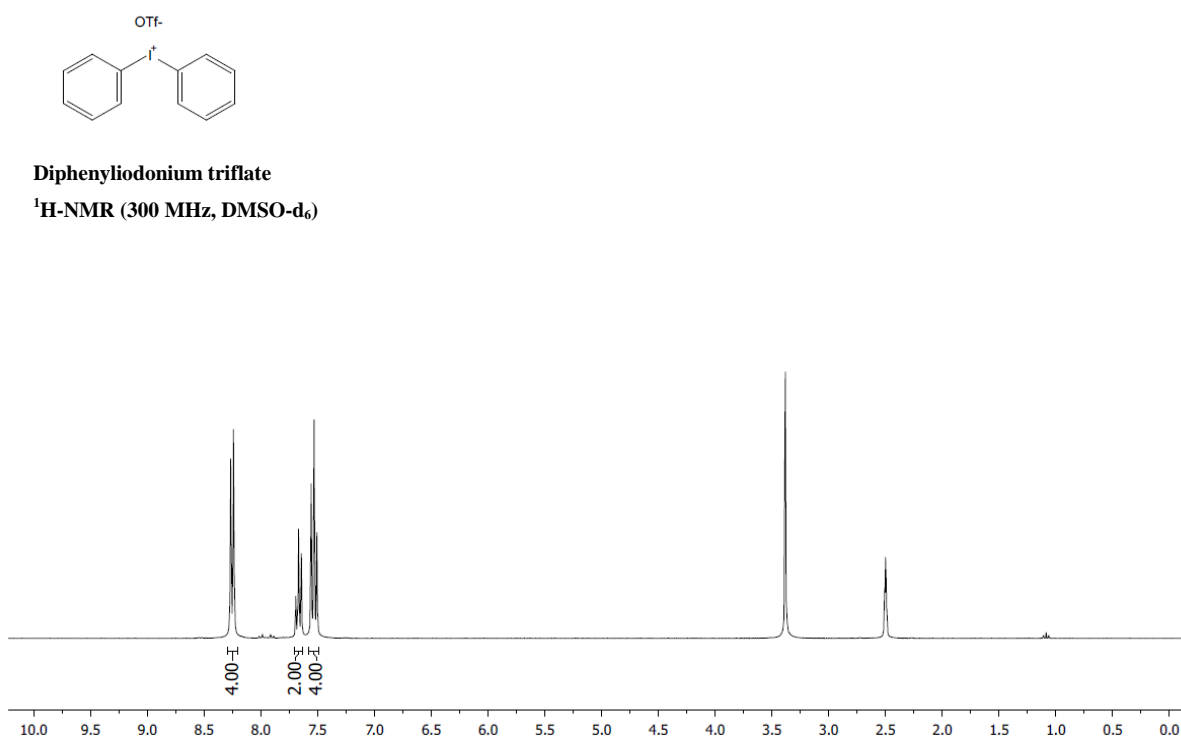

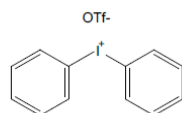

Diphenyliodonium triflate

$^{13}\text{C}$ -NMR (75 MHz, DMSO- $\text{d}_6$ )

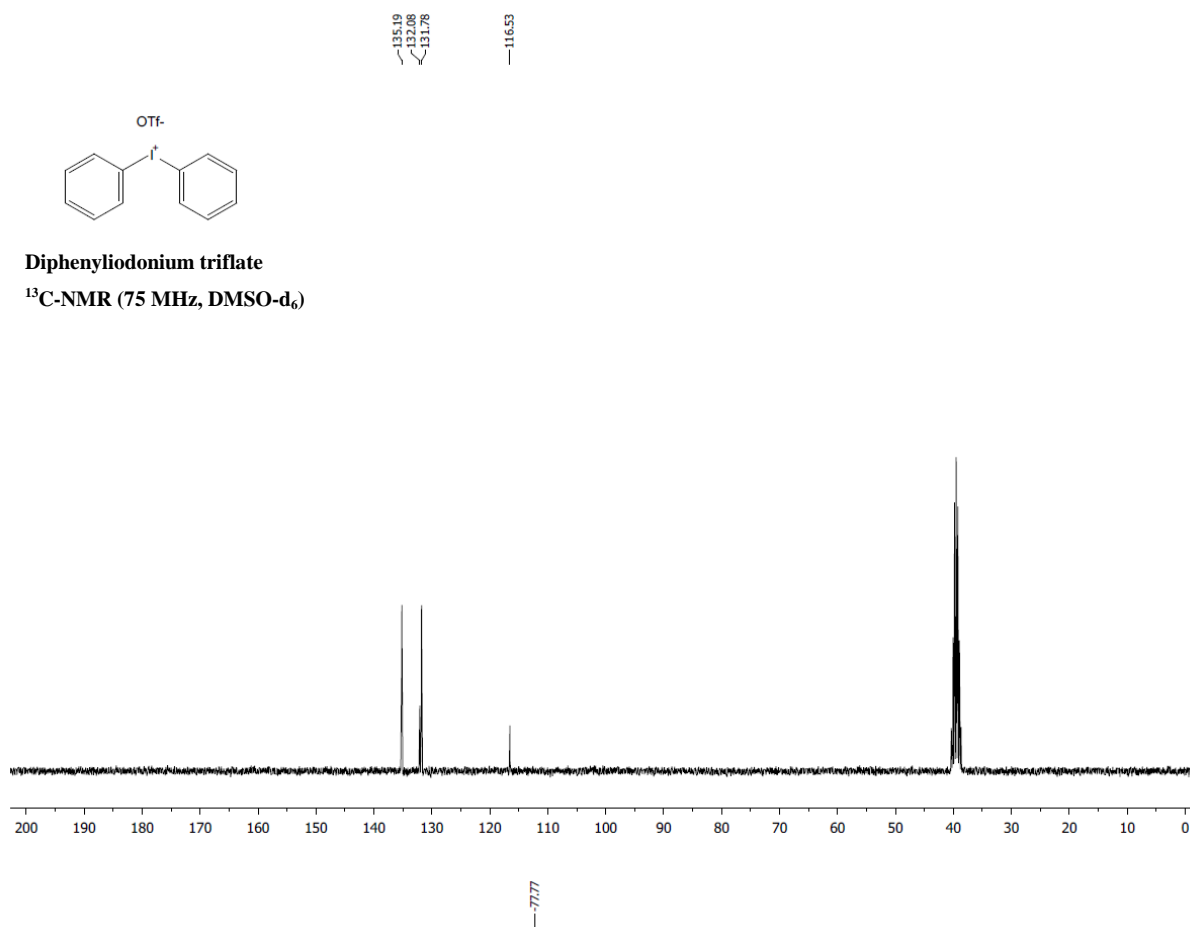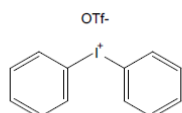

Diphenyliodonium triflate

$^{19}\text{F}$ -NMR (282 MHz, DMSO- $\text{d}_6$ )

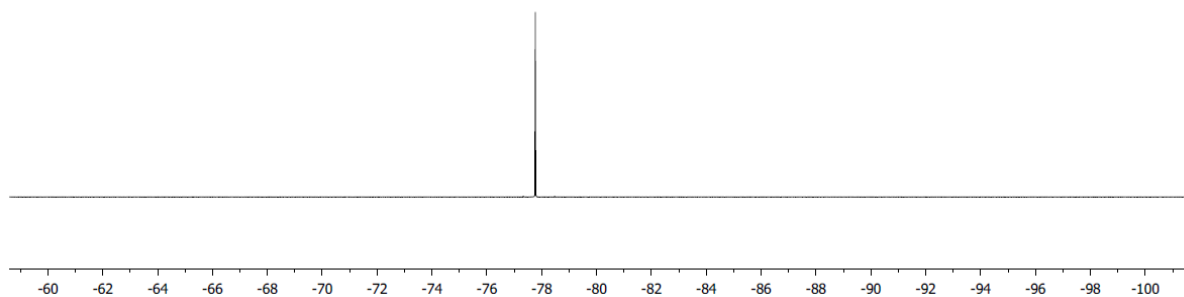

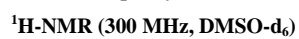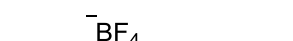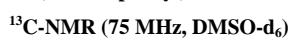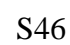

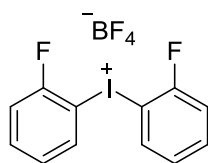

**Bis(2-fluorophenyl)iodonium tetrafluoroborate**

$^{19}\text{F}\{^1\text{H}\}$ -NMR (282 MHz,  $\text{CDCl}_3$ )

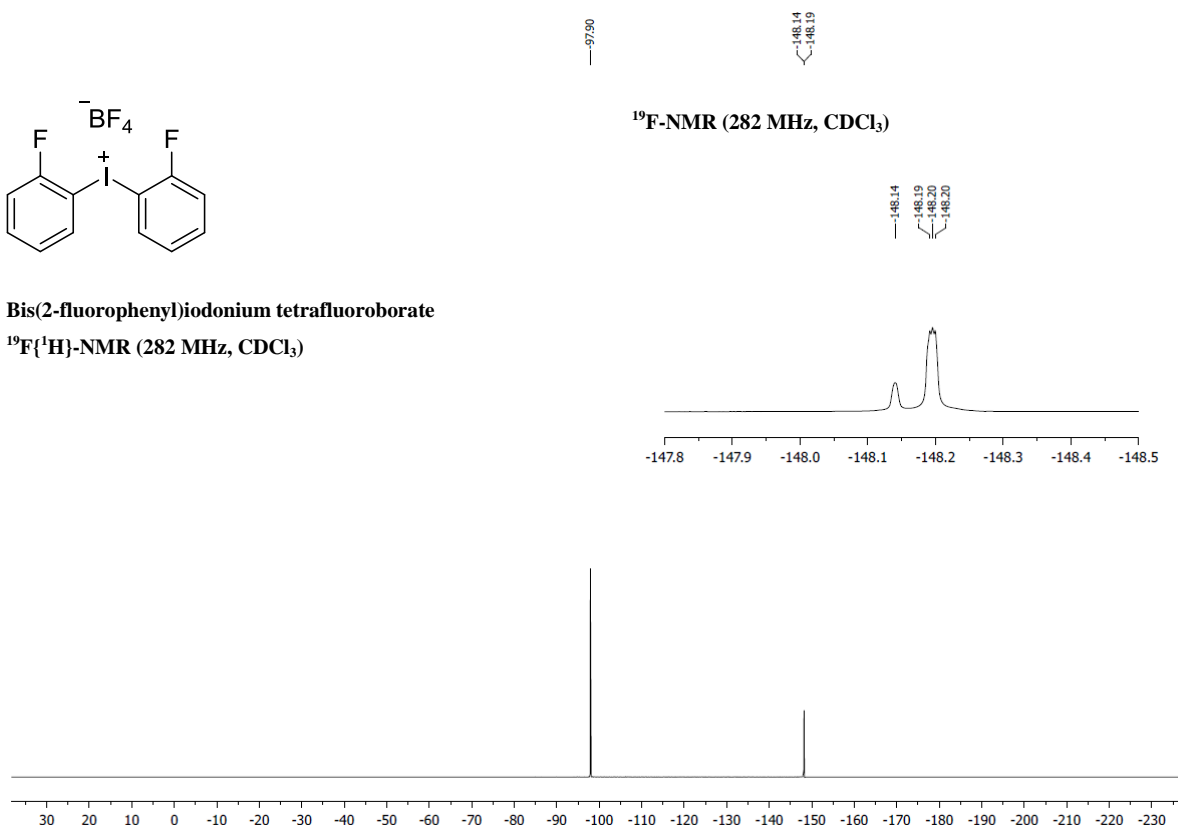

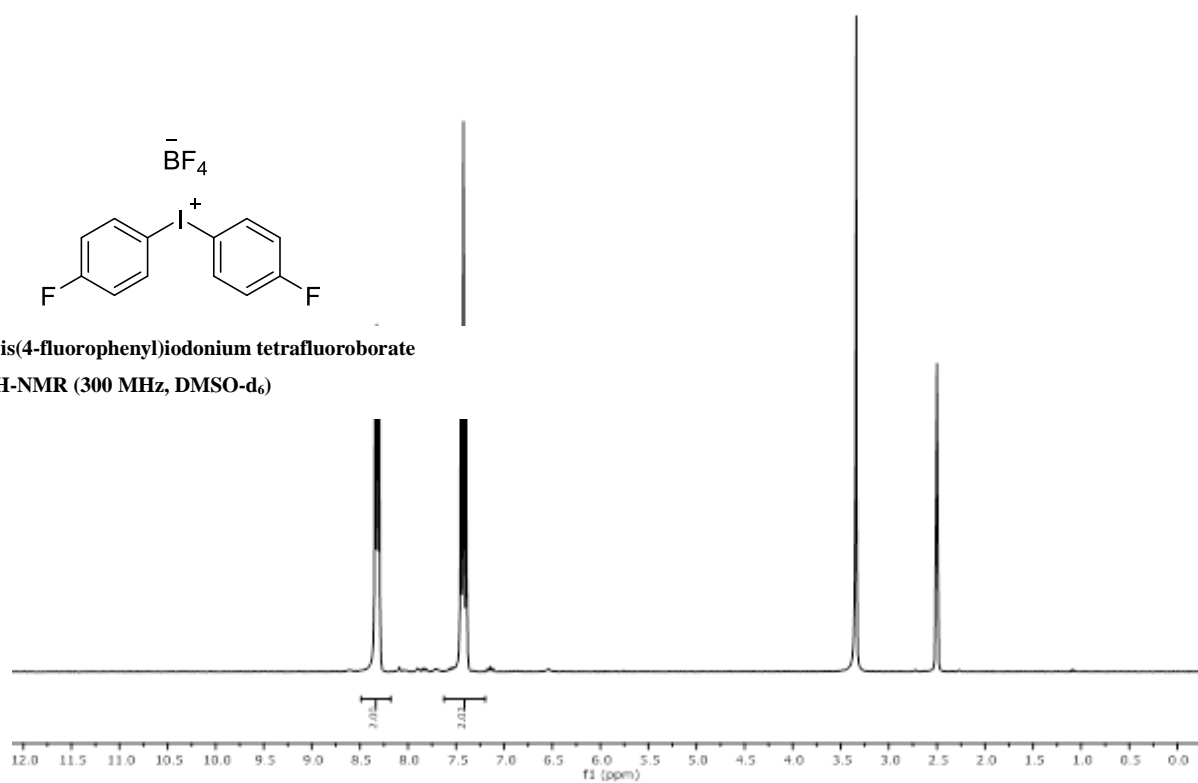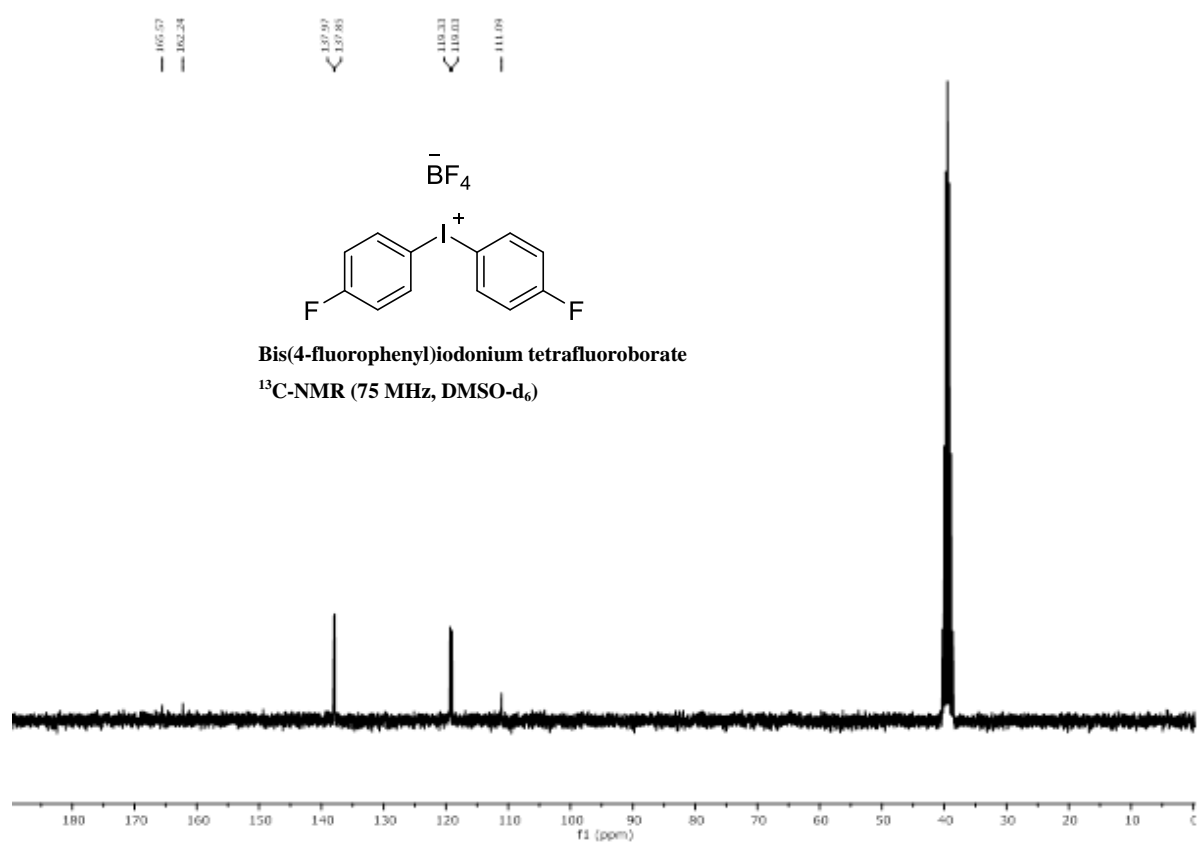



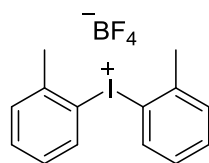

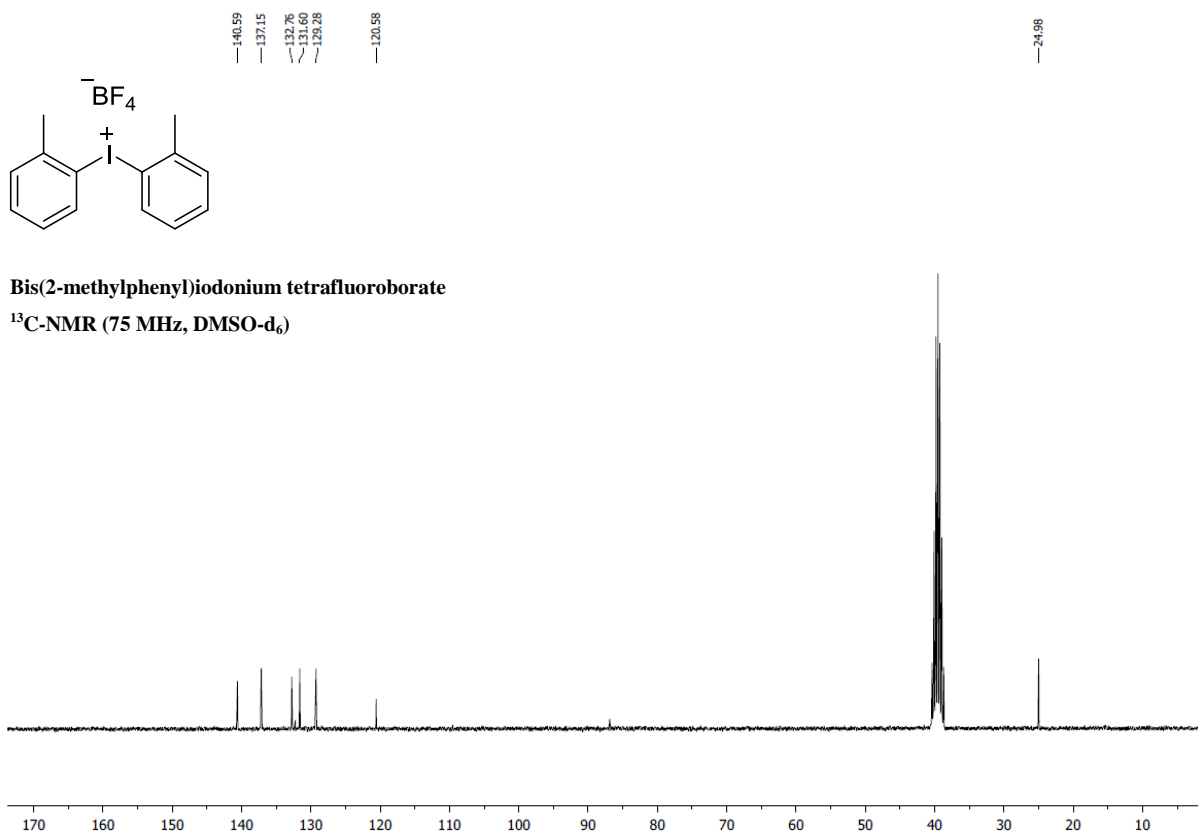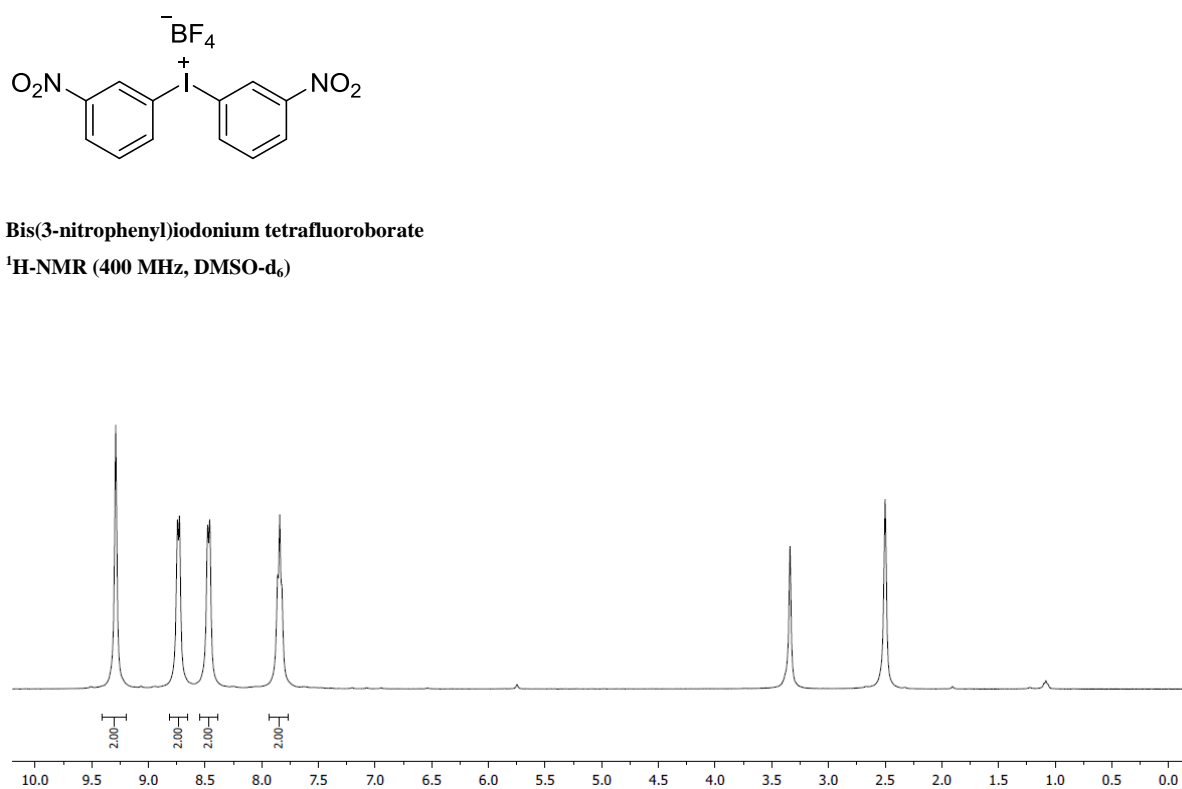

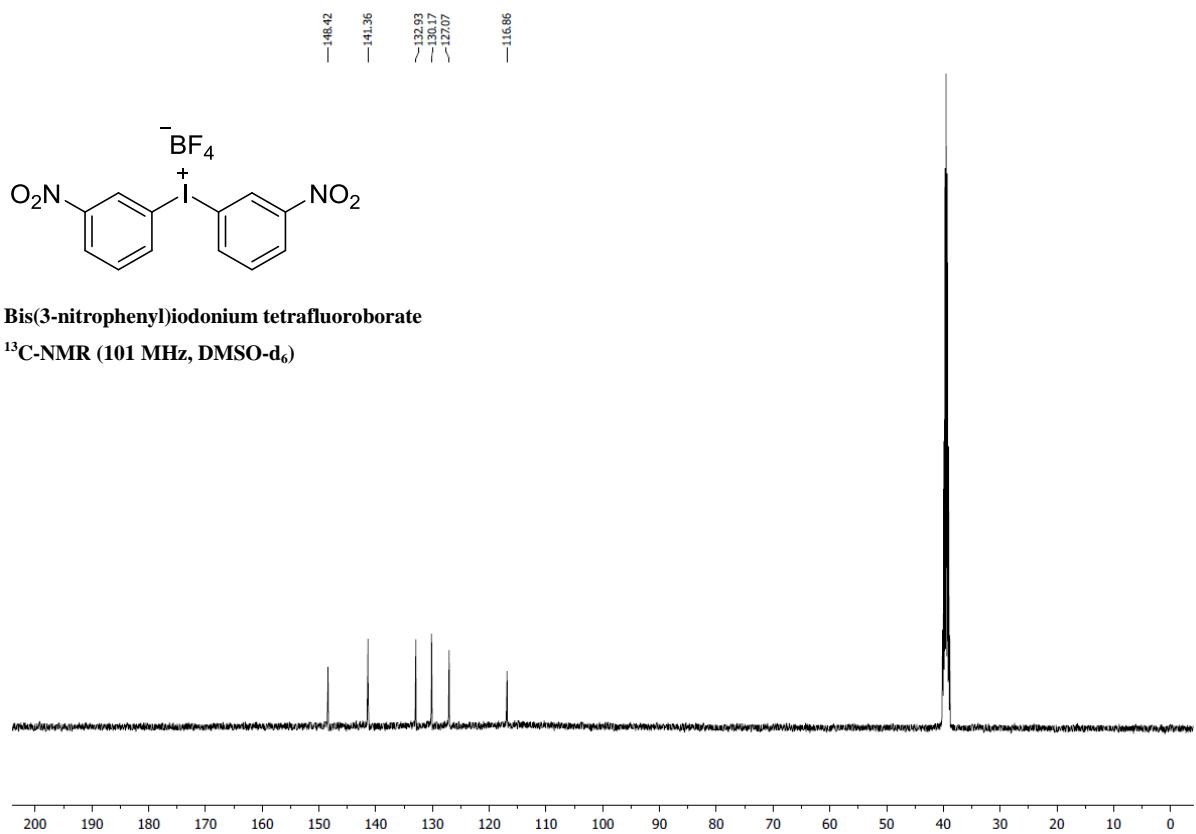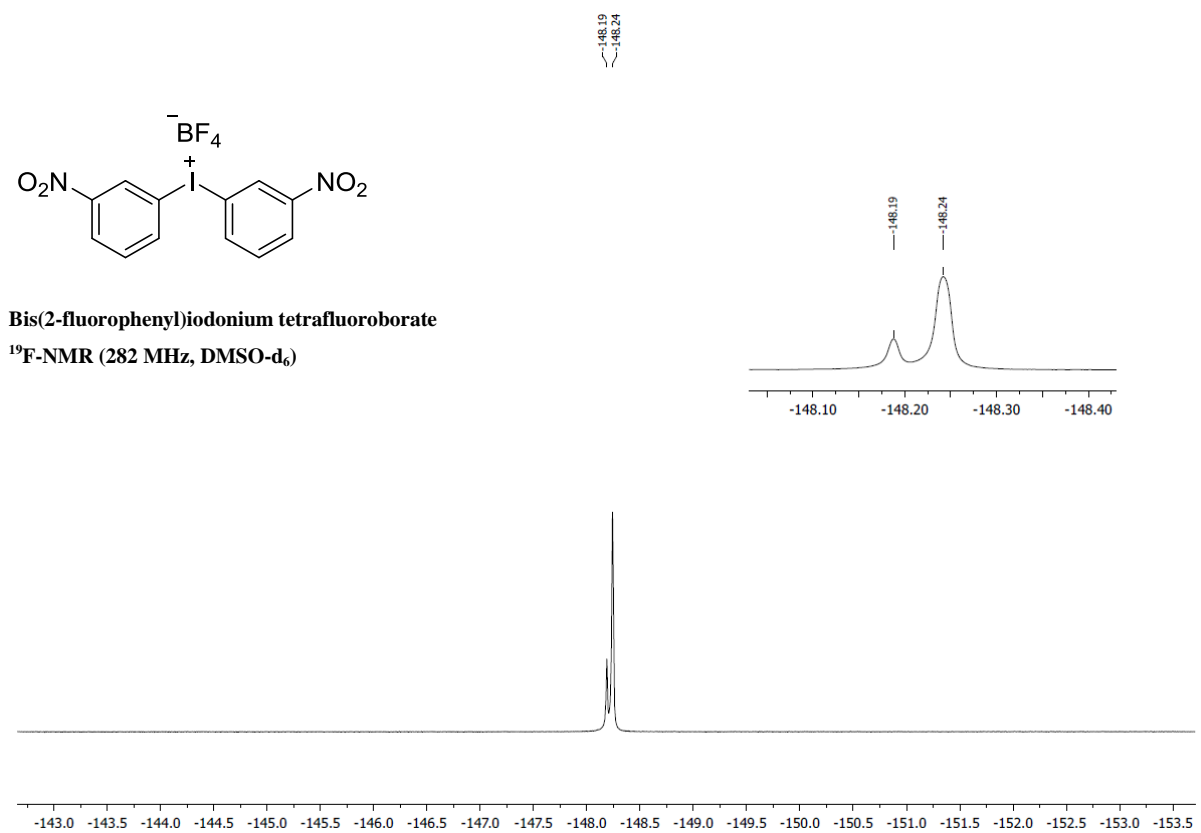

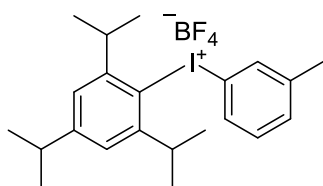

**(3-Methylphenyl)(2,4,6-triisopropylphenyl)iodonium tetrafluoroborate**  
 $^1\text{H-NMR}$  (300 MHz,  $\text{CDCl}_3$ )

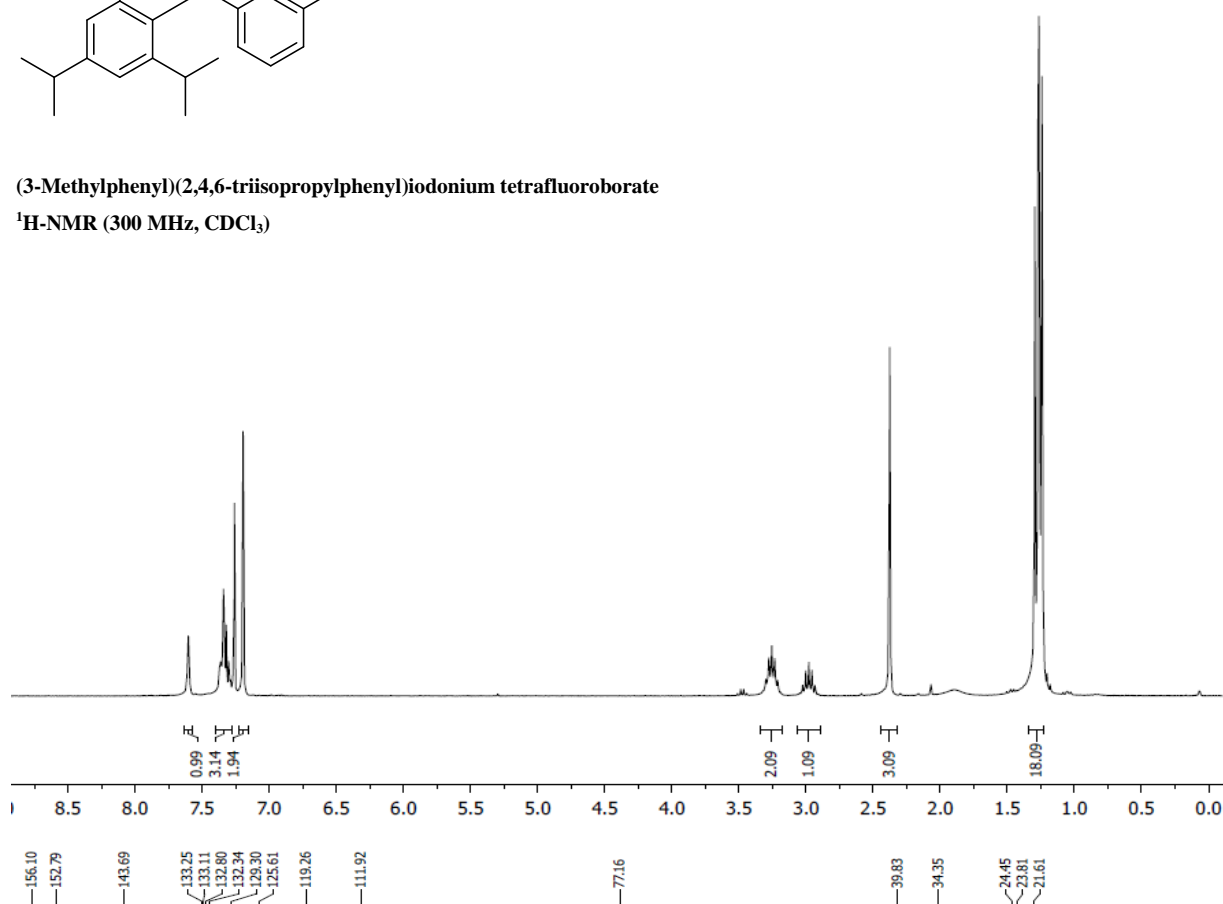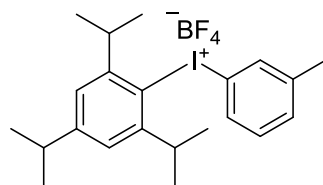

**(3-Methylphenyl)(2,4,6-triisopropylphenyl)iodonium tetrafluoroborate**  
 $^{13}\text{C-NMR}$  (75 MHz,  $\text{CDCl}_3$ )

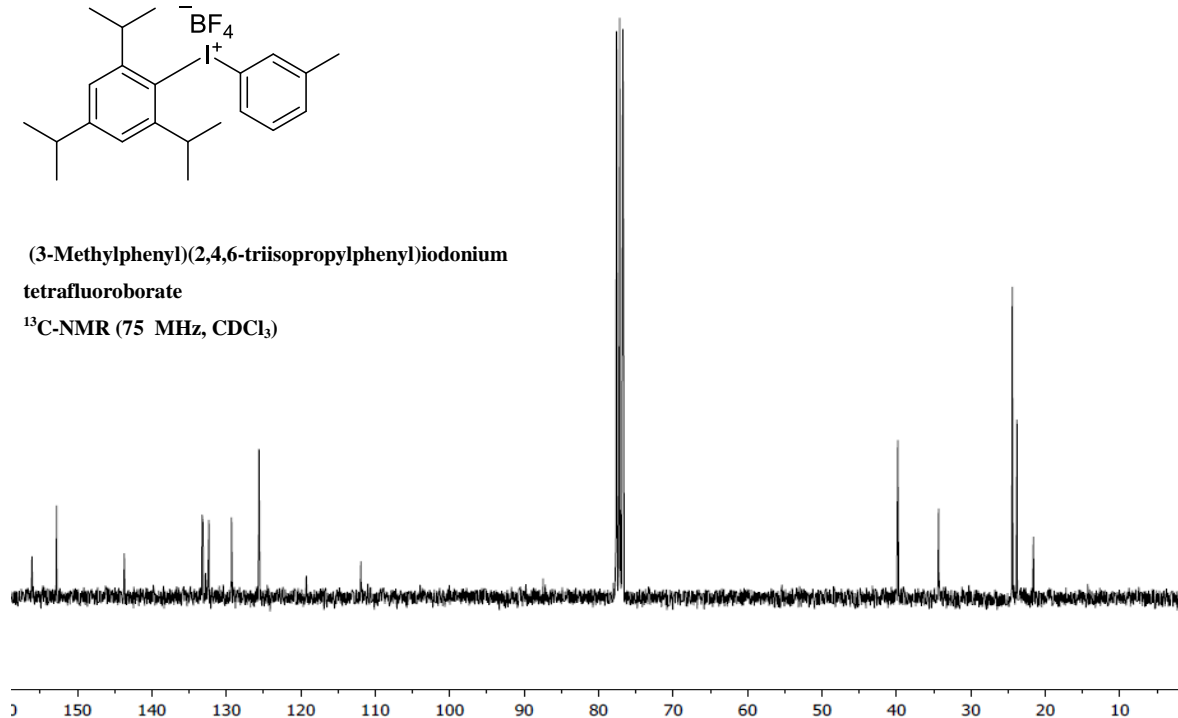

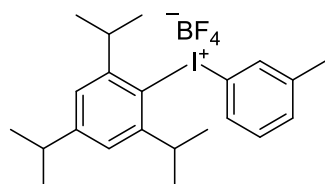

-147.91  
-147.91  
-147.95  
-147.96  
-147.97

**(3-Methylphenyl)(2,4,6-triisopropylphenyl)iodonium  
tetrafluoroborate**  
 $^{19}\text{F}$ -NMR (282 MHz,  $\text{CDCl}_3$ )

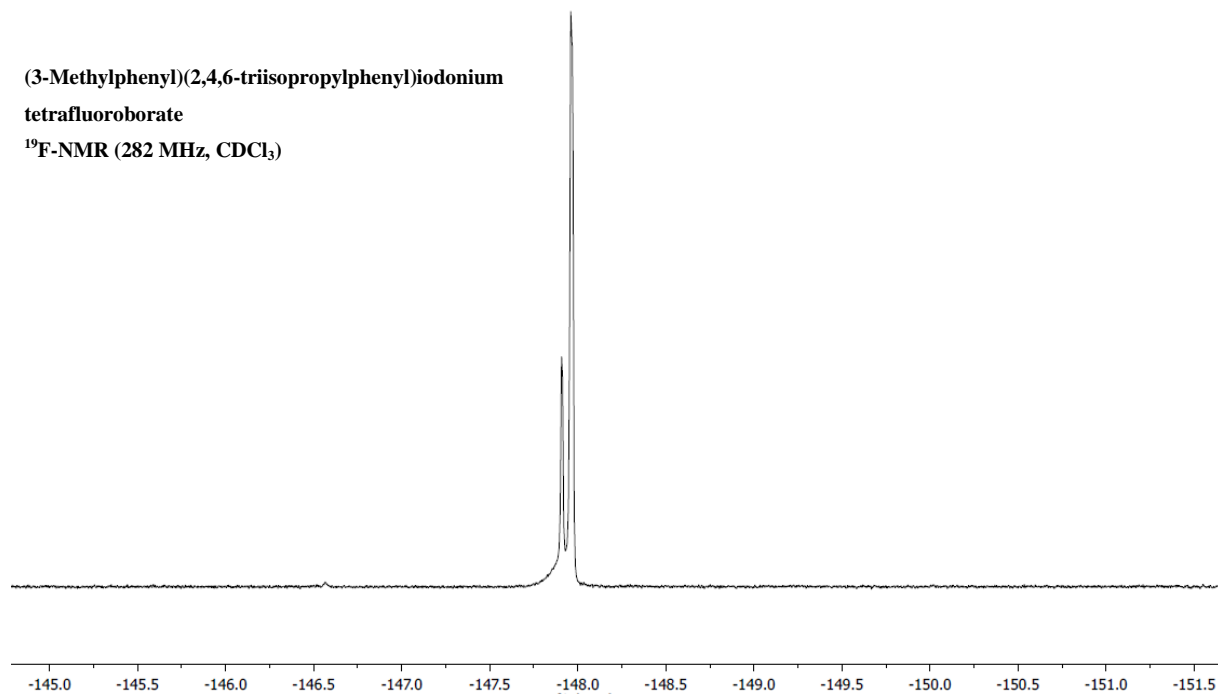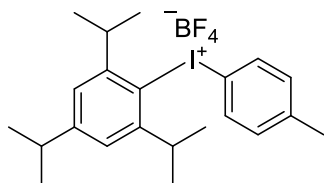

**(4-Methylphenyl)(2,4,6-triisopropylphenyl)iodonium tetrafluoroborate**  
 $^1\text{H}$ -NMR (300 MHz,  $\text{DMSO}-d_6$ )

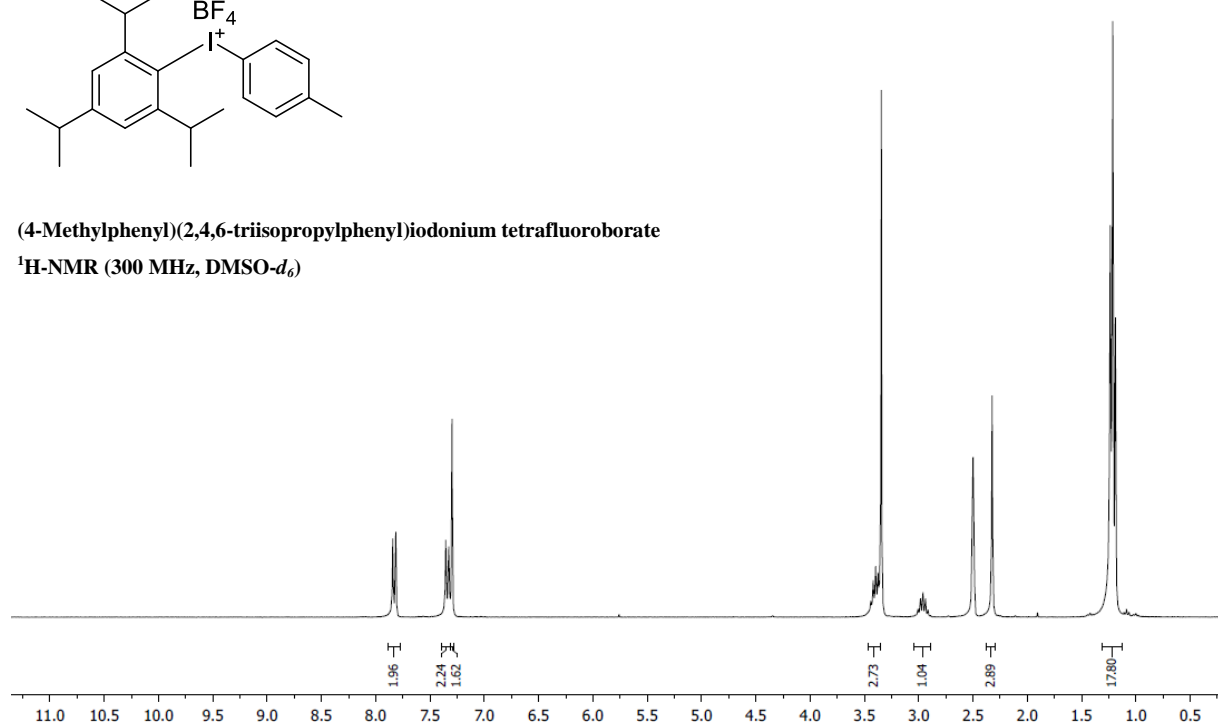

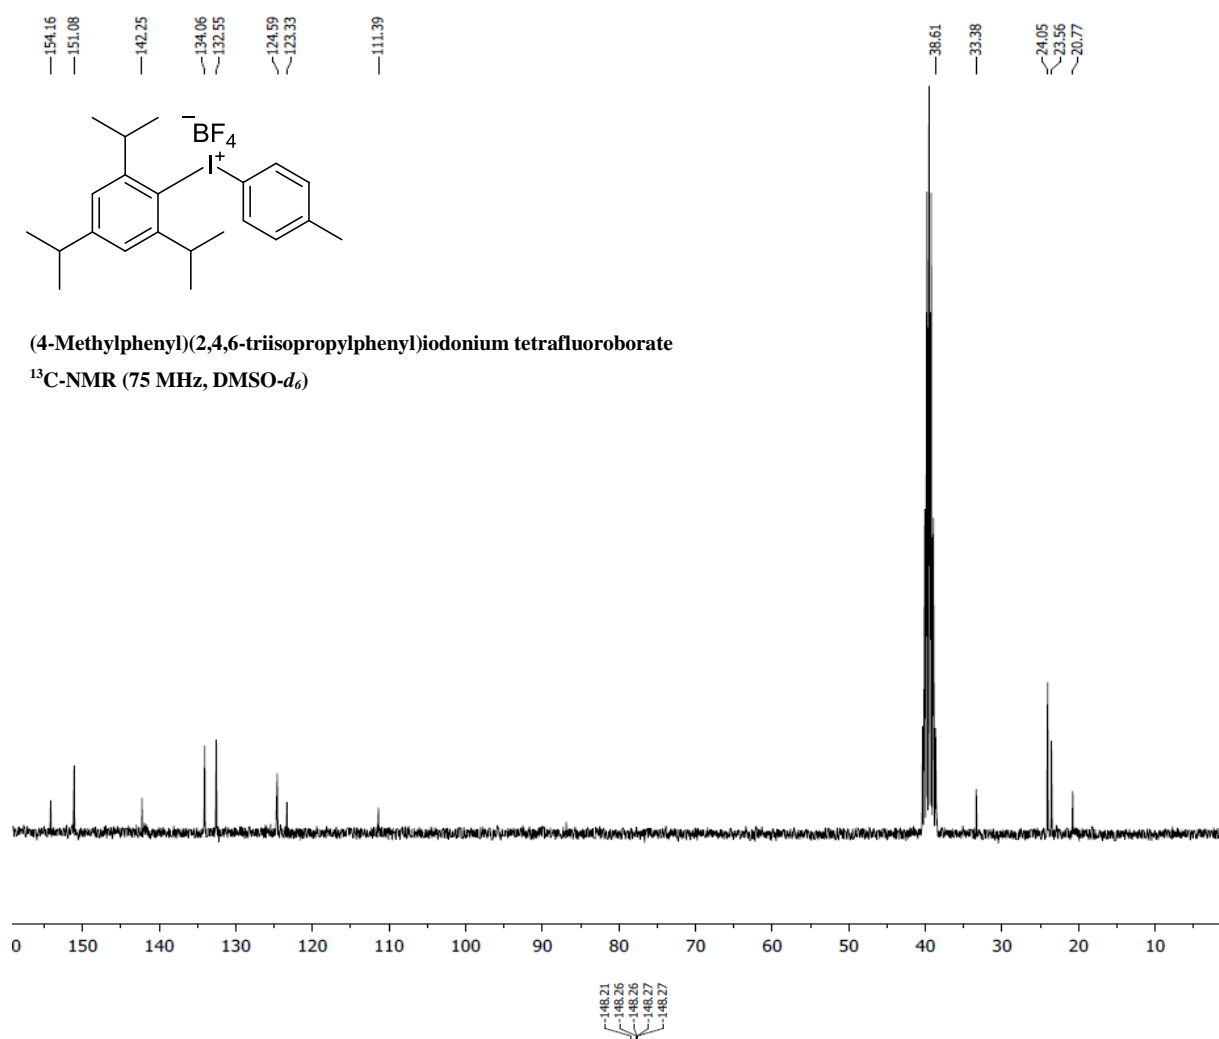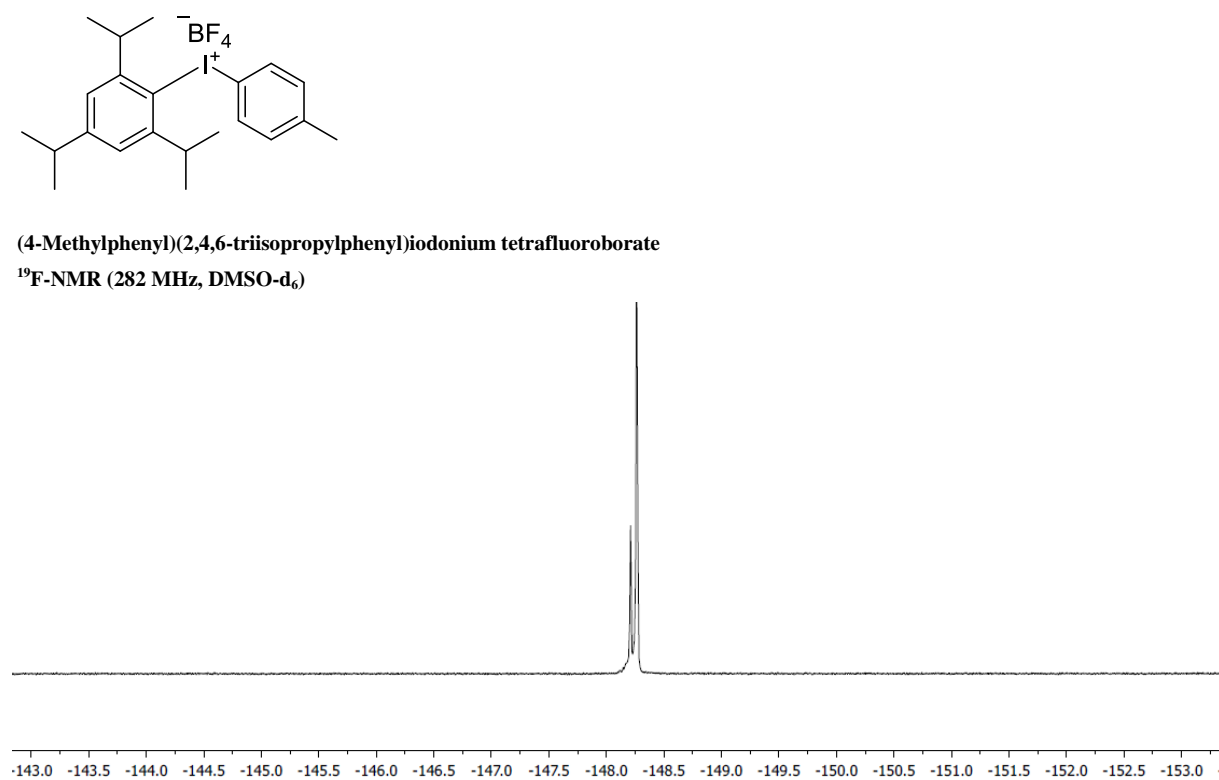

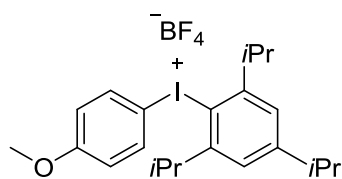

**(4-Methoxyphenyl)(2,4,6-triisopropylphenyl)iodonium tetrafluoroborate**

<sup>1</sup>H-NMR (300 MHz, CDCl<sub>3</sub>)

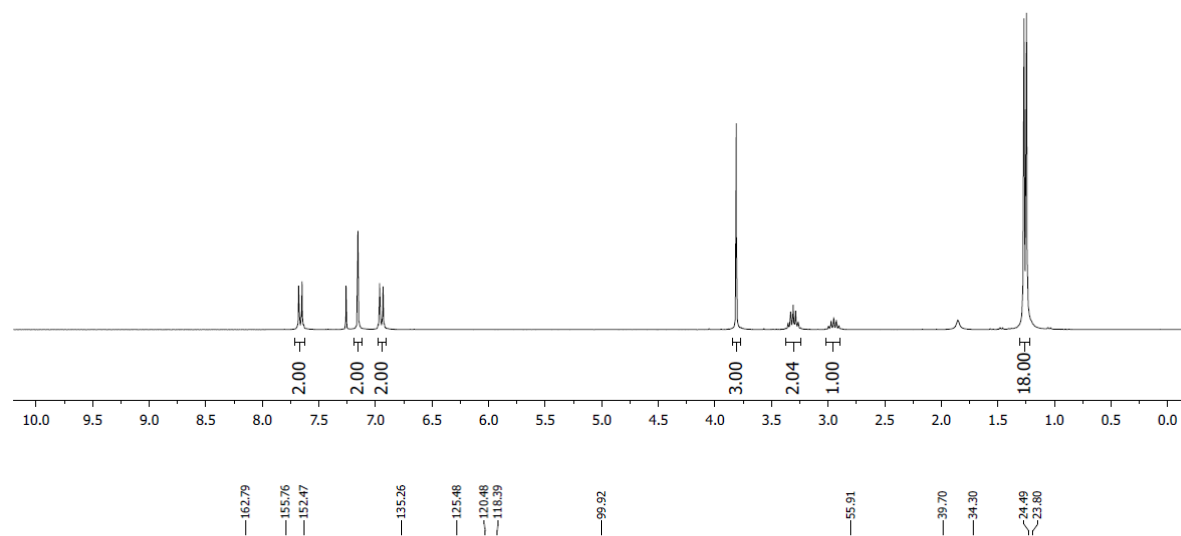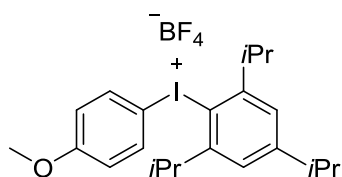

**(4-Methoxyphenyl)(2,4,6-triisopropylphenyl)iodonium tetrafluoroborate**

<sup>13</sup>C-NMR (75 MHz, CDCl<sub>3</sub>)

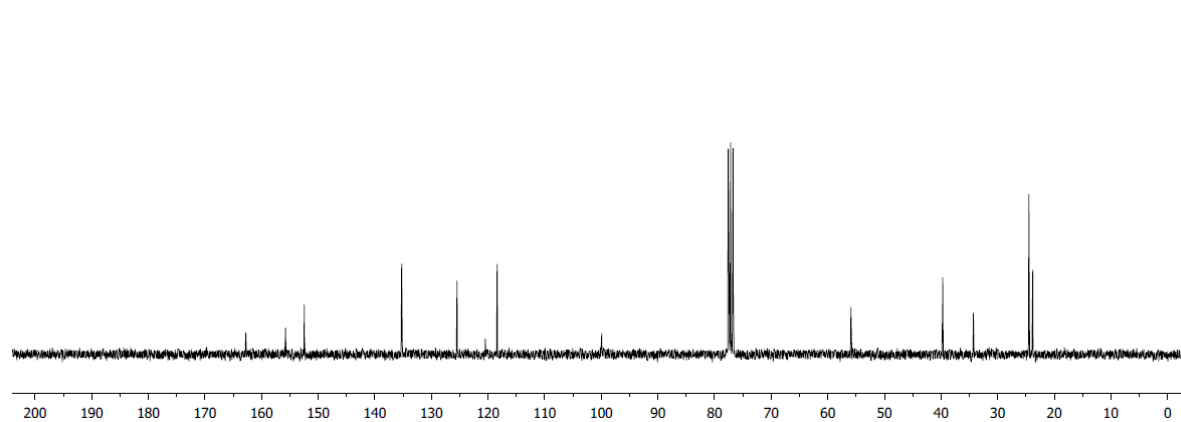

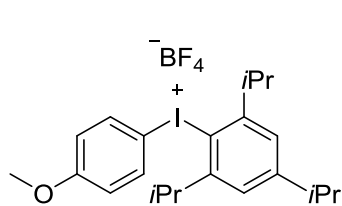

**(4-Methoxyphenyl)(2,4,6-triisopropylphenyl)iodonium tetrafluoroborate**

<sup>19</sup>F-NMR (282 MHz, CDCl<sub>3</sub>)

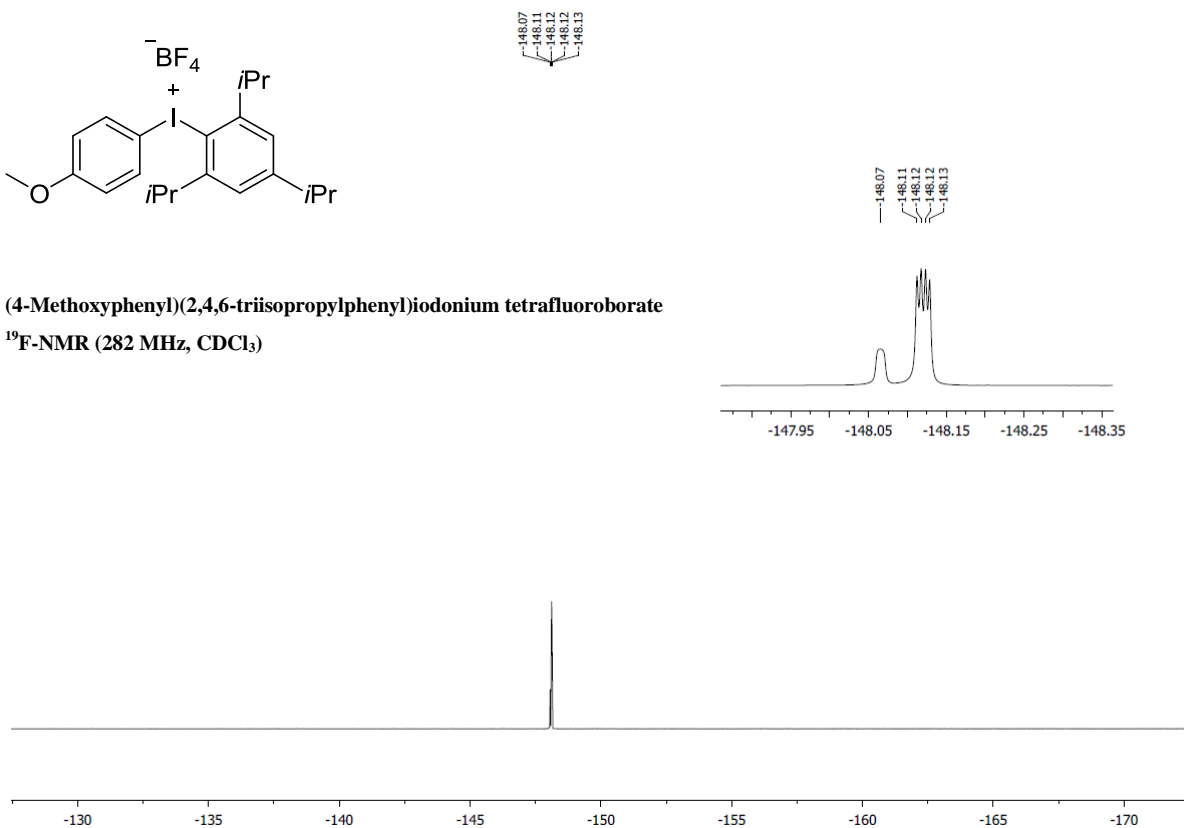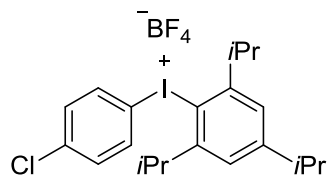

**(4-Chlorophenyl)(2,4,6-triisopropylphenyl)iodonium tetrafluoroborate**

<sup>1</sup>H-NMR (300 MHz, CDCl<sub>3</sub>)

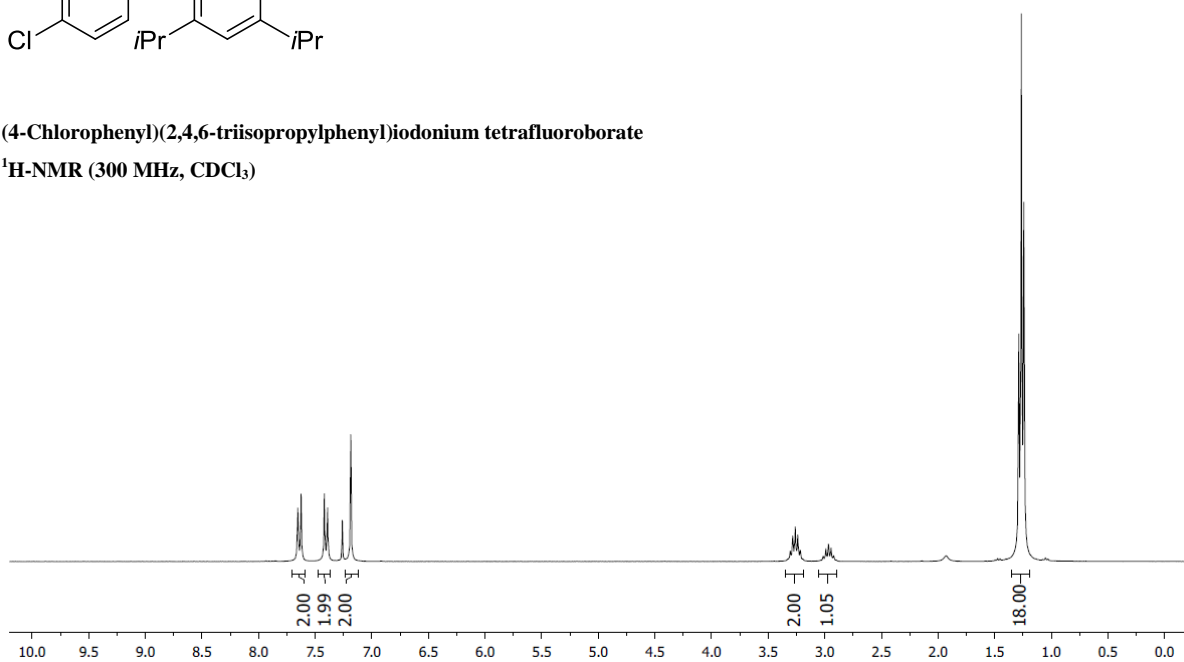



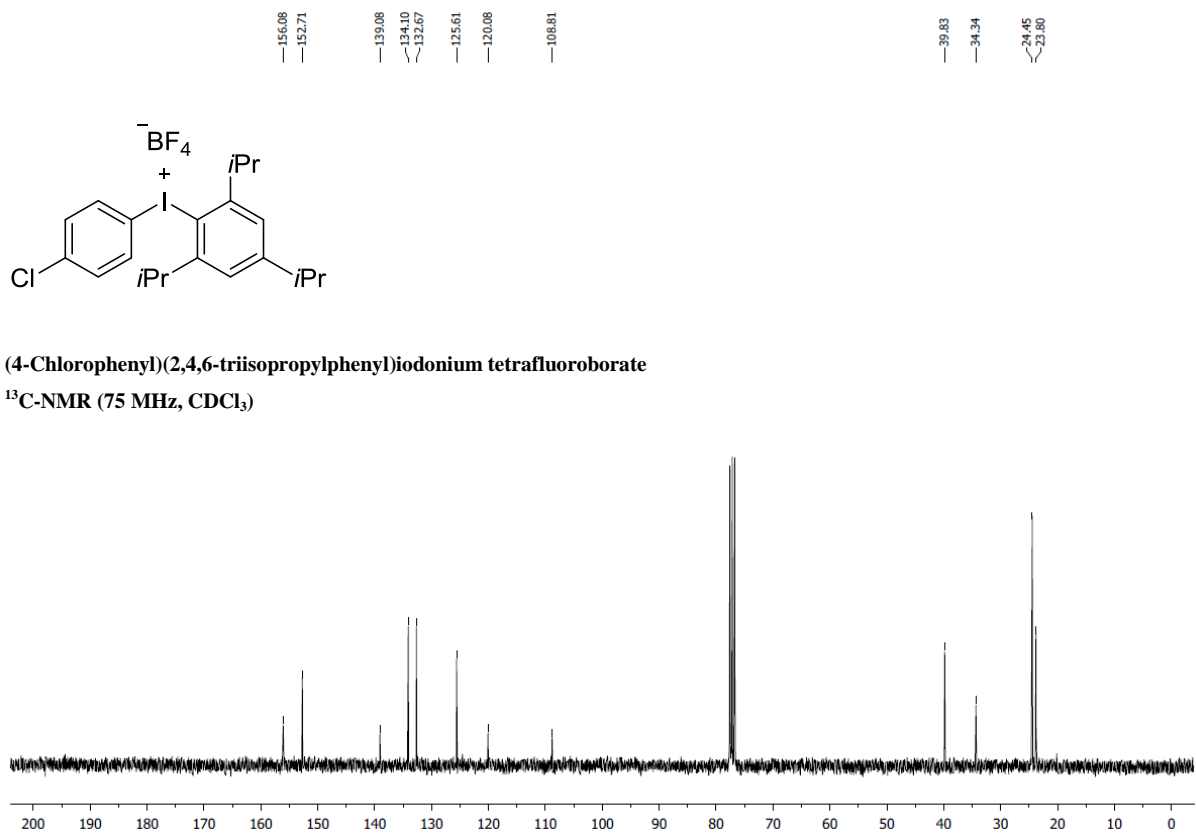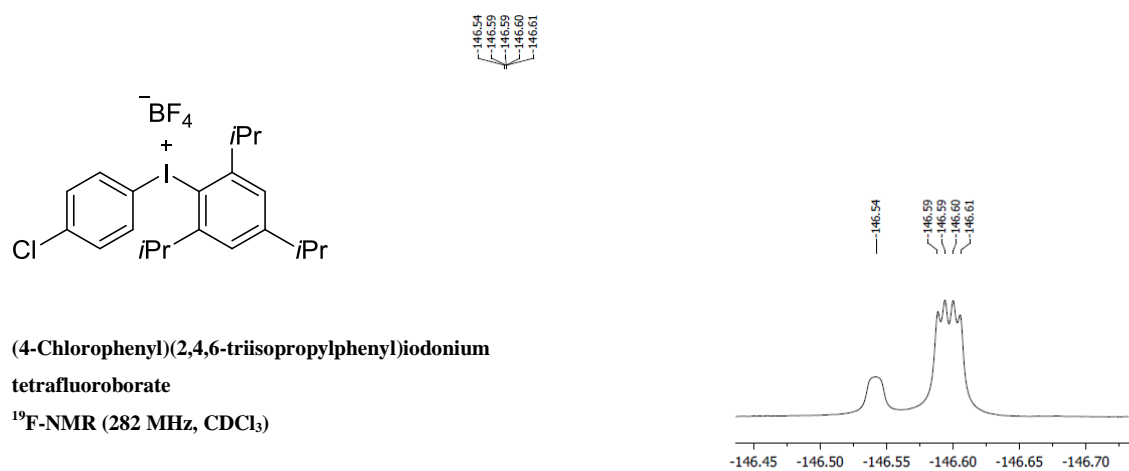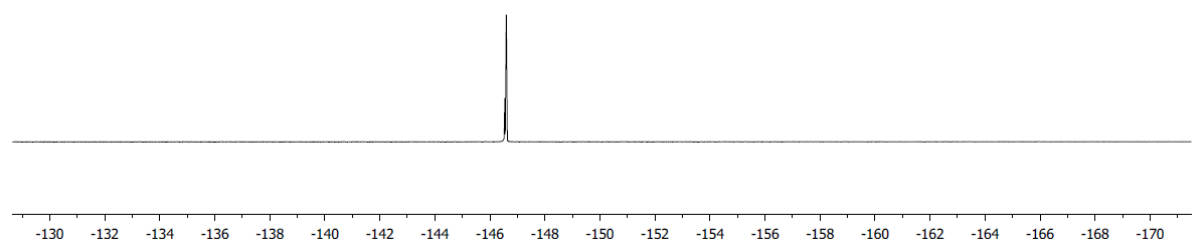

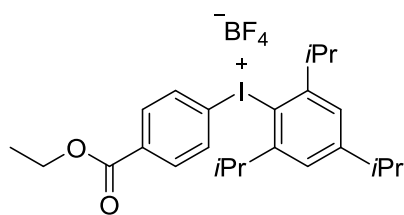

**(4-Ethoxycarbonylphenyl)(2,4,6-triisopropylphenyl)iodonium**

**tetrafluoroborate**

**<sup>1</sup>H-NMR (300 MHz, CDCl<sub>3</sub>)**

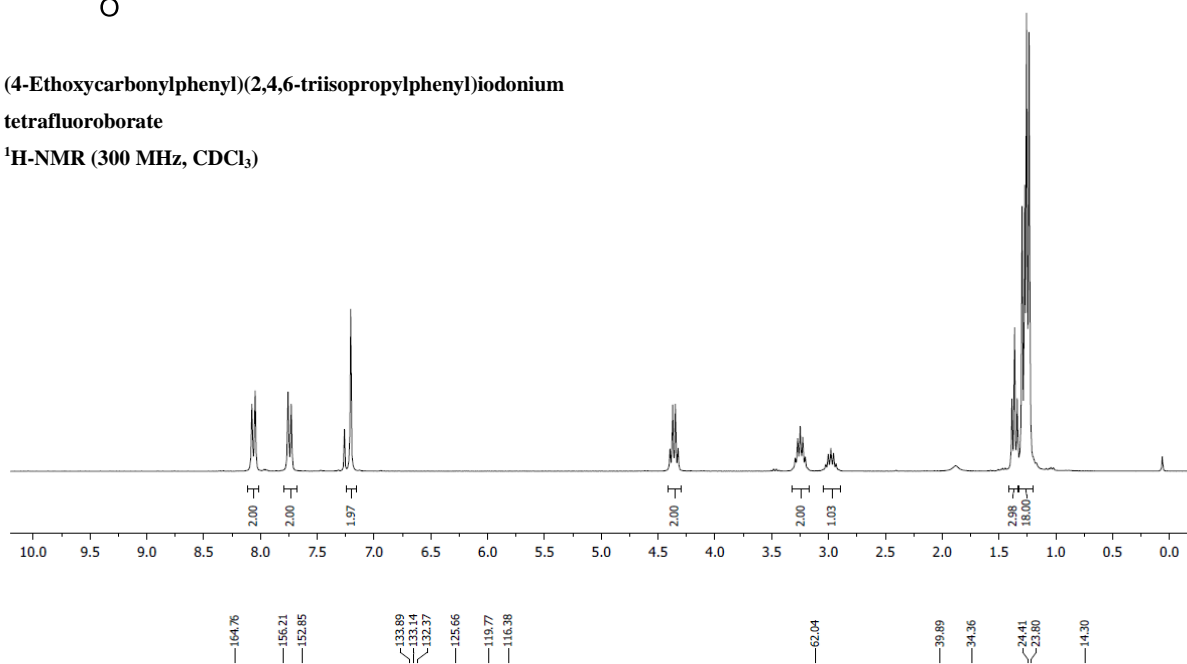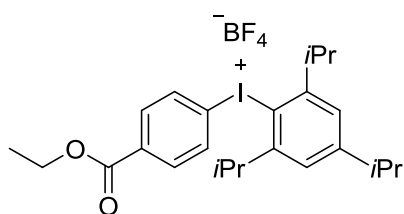

**(4-Ethoxycarbonylphenyl)(2,4,6-triisopropylphenyl)iodonium**

**tetrafluoroborate**

**<sup>13</sup>C-NMR (75 MHz, CDCl<sub>3</sub>)**

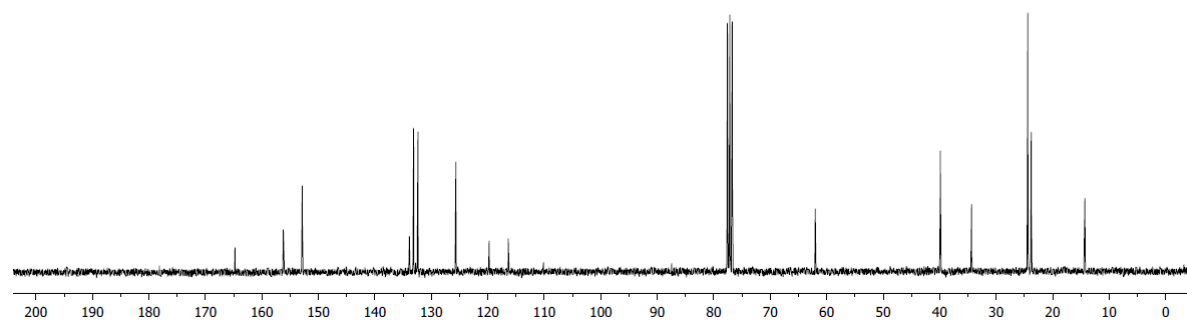

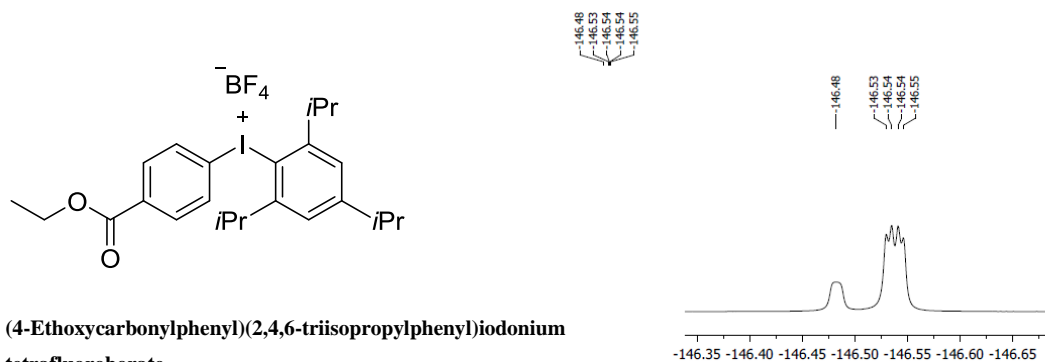

<sup>19</sup>F-NMR (282 MHz, CDCl<sub>3</sub>)

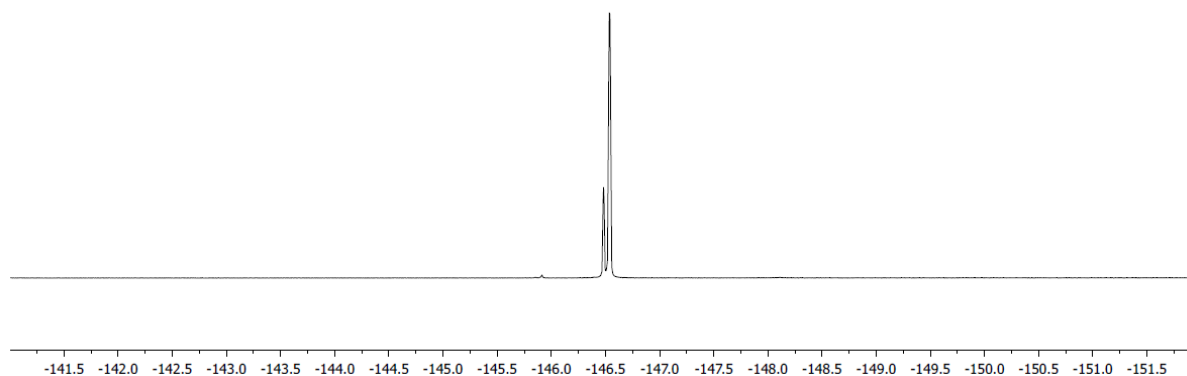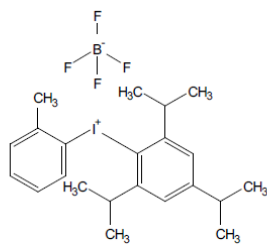

2-(Methylphenyl)(2,4,6-triisopropylphenyl)iodonium tetrafluoroborate

<sup>1</sup>H-NMR (300 MHz, CDCl<sub>3</sub>)

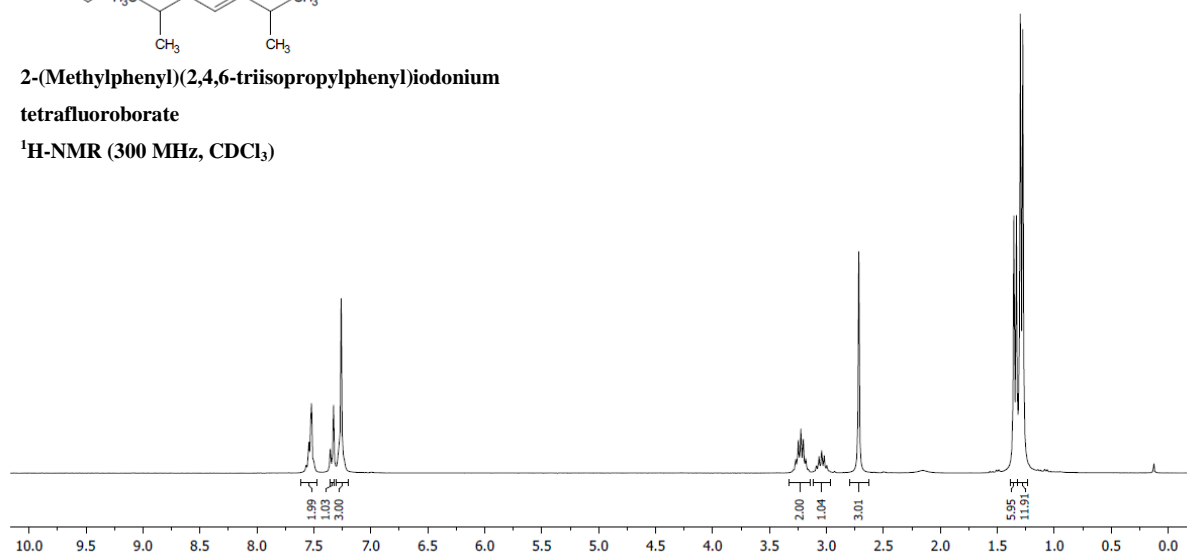

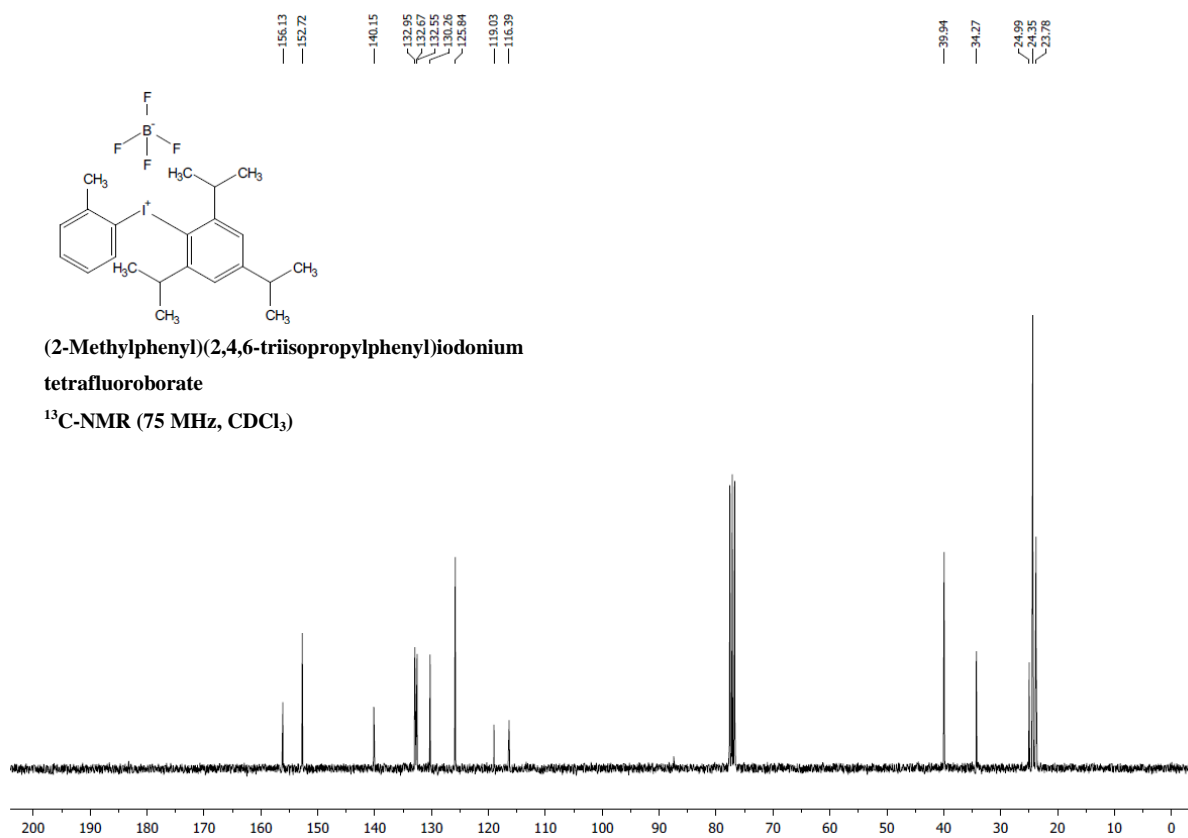

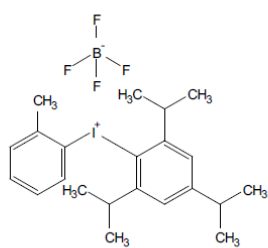

**(2-Methylphenyl)(2,4,6-triisopropylphenyl)iodonium  
tetrafluoroborate**

<sup>19</sup>F-NMR (282 MHz, CDCl<sub>3</sub>)

148.58  
148.63  
148.64  
148.65

148.58

148.63  
148.64  
148.65

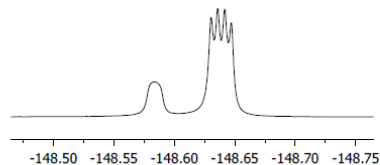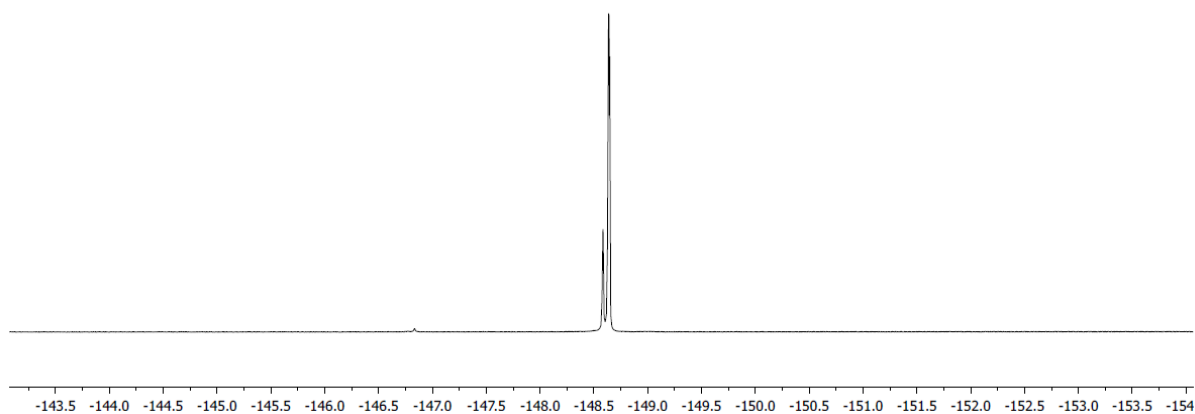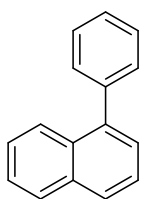

**1-Phenylnaphthalene (3a)**

<sup>1</sup>H-NMR (400 MHz, CDCl<sub>3</sub>)

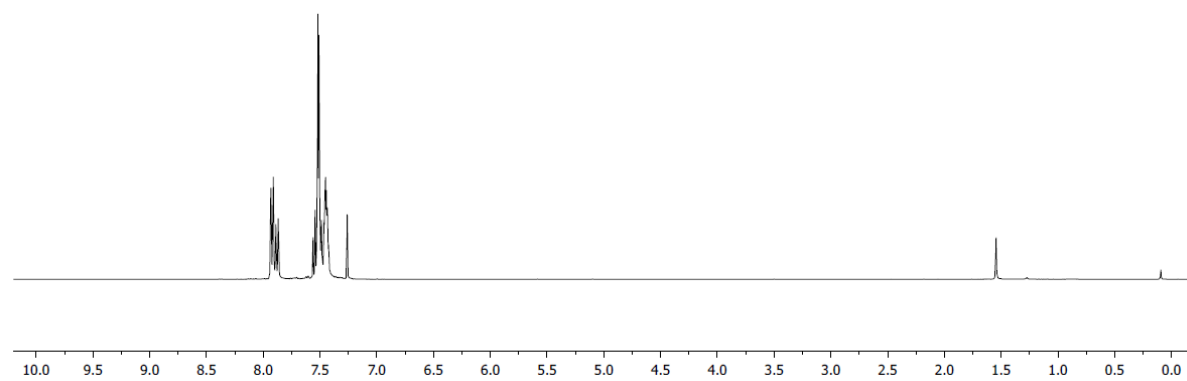

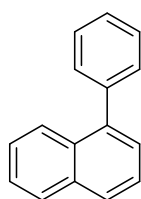

**1-Phenylnaphthalene (3a)**

**$^{13}\text{C}$ -NMR (101 MHz,  $\text{CDCl}_3$ )**

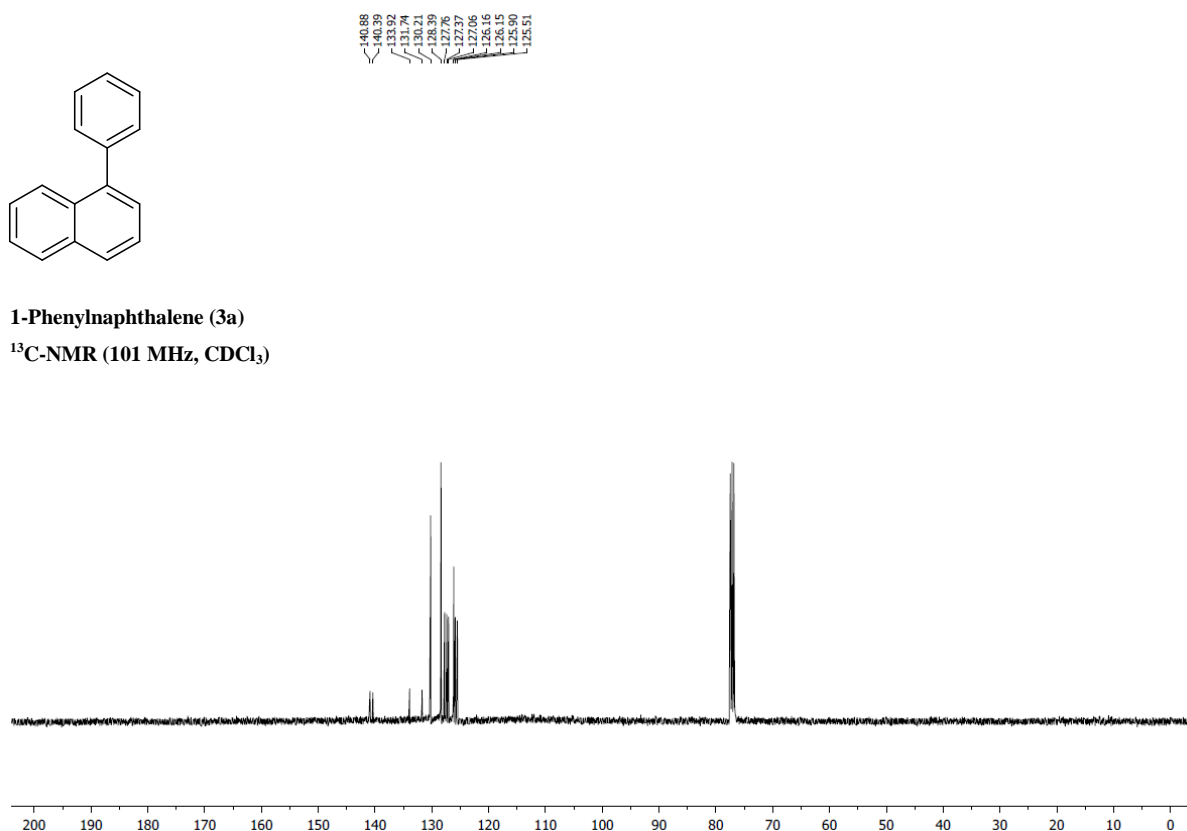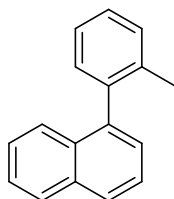

**1-(2-Methylphenyl)naphthalene (3b)**

**$^1\text{H}$ -NMR (300 MHz,  $\text{CDCl}_3$ )**

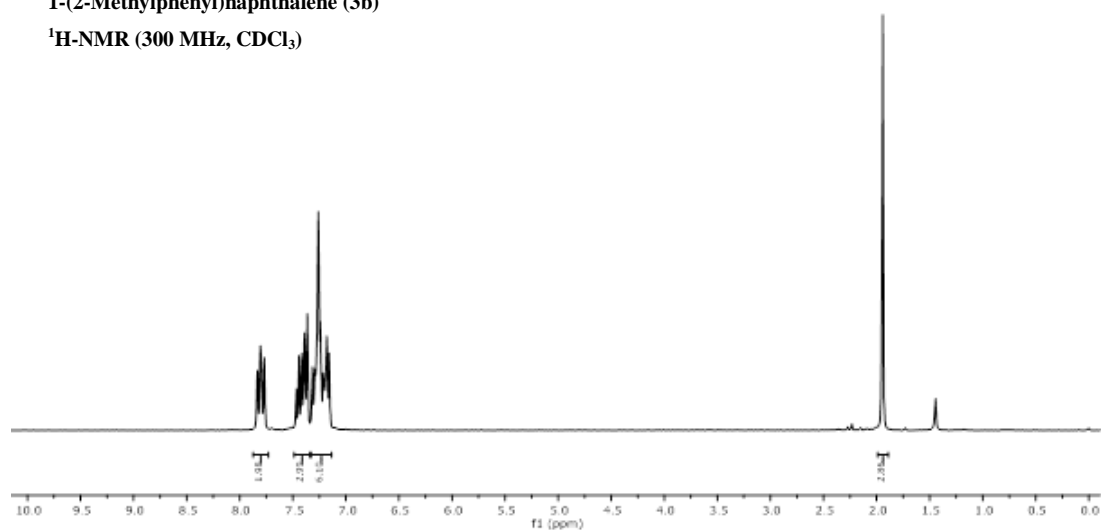

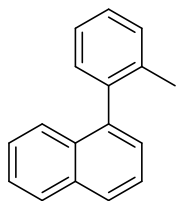

**1-(2-Methylphenyl)naphthalene (3b)**

$^{13}\text{C}$ -NMR (101 MHz,  $\text{CDCl}_3$ )

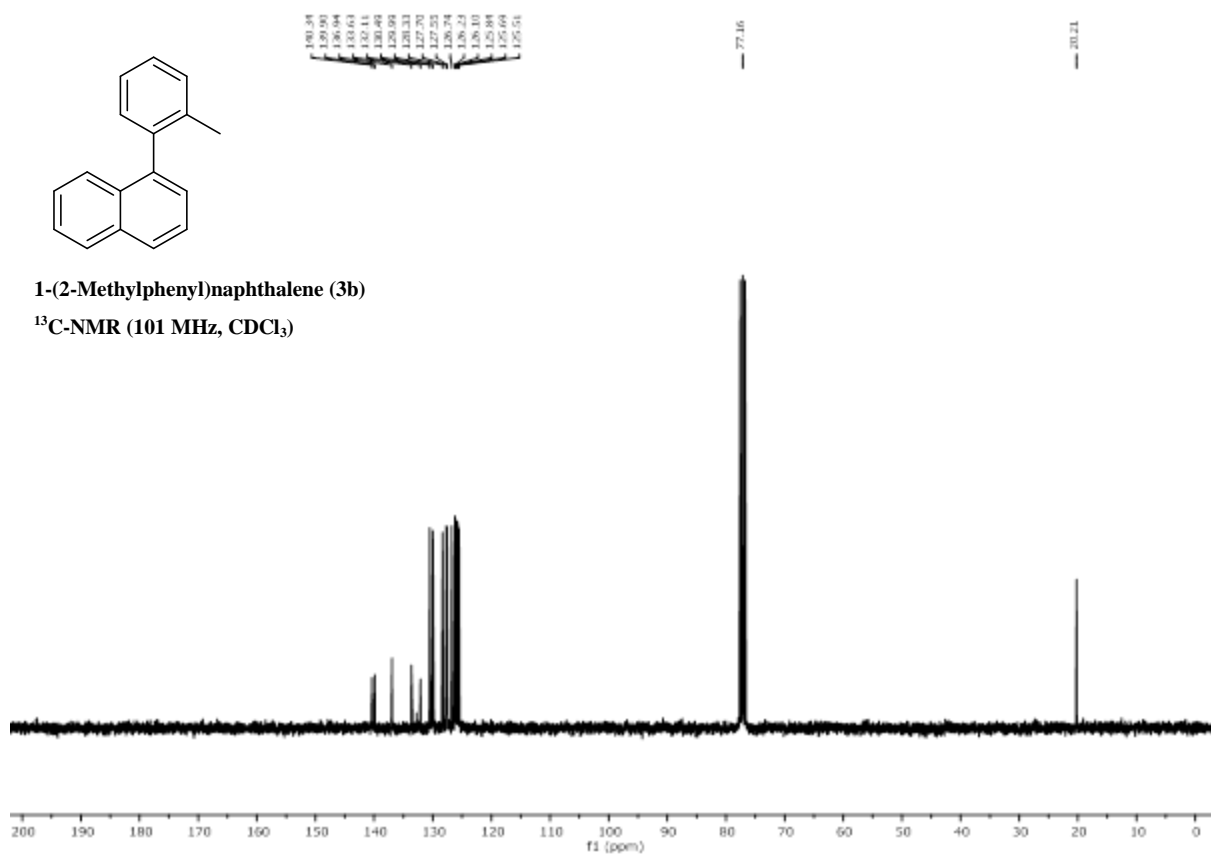

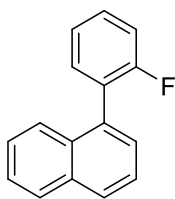

**1-(2-Fluorophenyl)naphthalene (3c)**

**<sup>1</sup>H-NMR (400 MHz, CDCl<sub>3</sub>)**

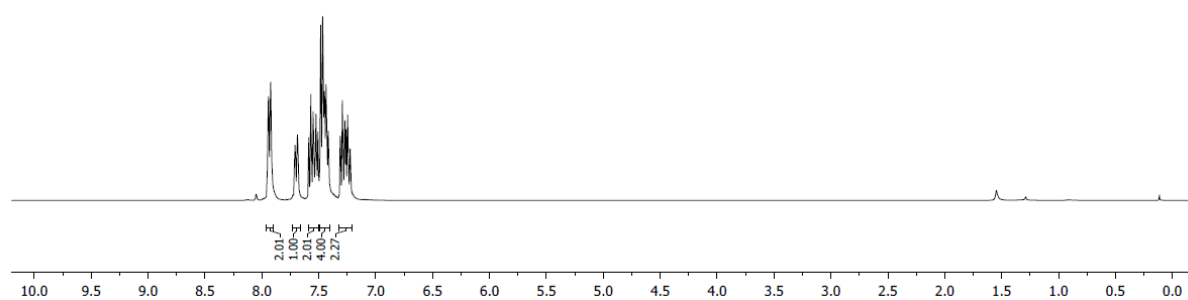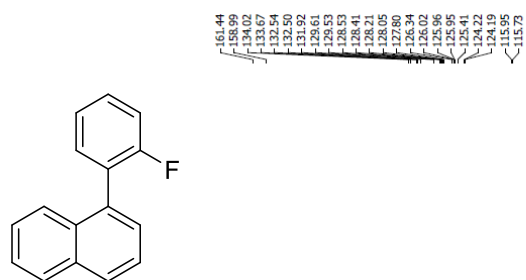

**1-(2-Fluorophenyl)naphthalene (3c)**

**<sup>13</sup>C-NMR (101 MHz, CDCl<sub>3</sub>)**

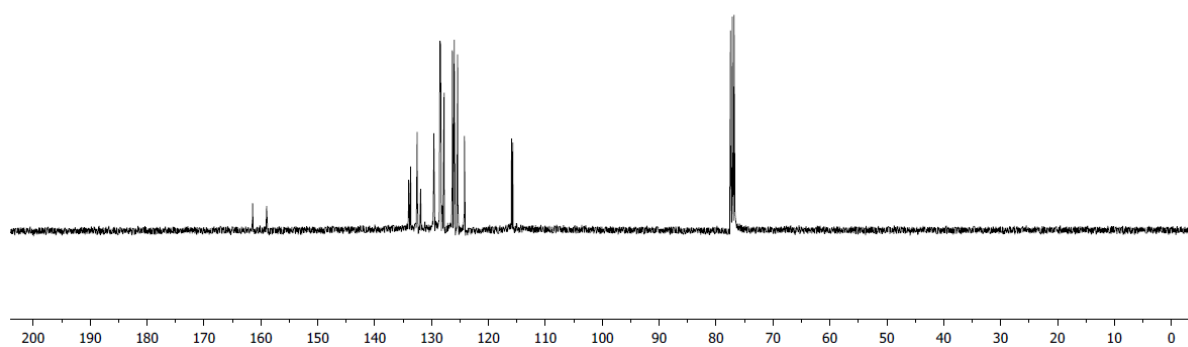



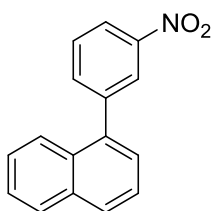

**1-(3-Nitrophenyl)naphthalene (3d)**

<sup>1</sup>H-NMR (300 MHz, CDCl<sub>3</sub>)

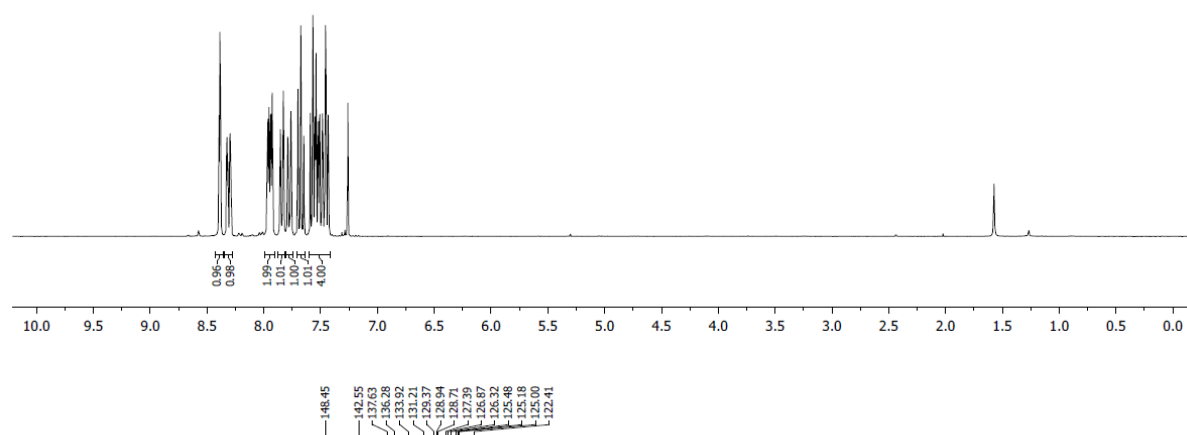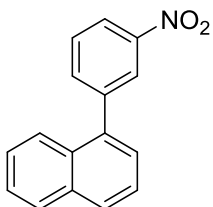

**1-(3-Nitrophenyl)naphthalene (3d)**

<sup>13</sup>C-NMR (75 MHz, CDCl<sub>3</sub>)

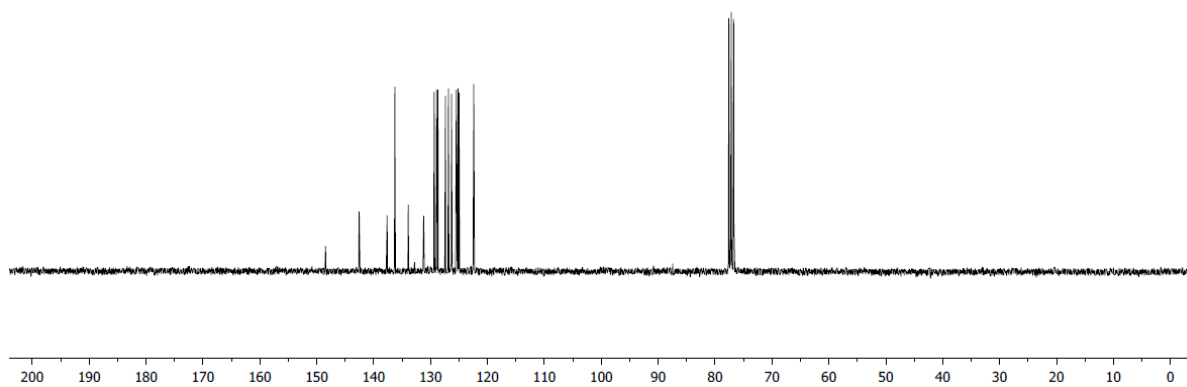

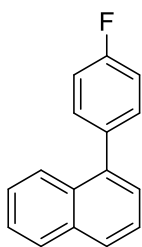

**1-(4-Fluorophenyl)naphthalene (2e)**

<sup>1</sup>H-NMR (300 MHz, CDCl<sub>3</sub>)

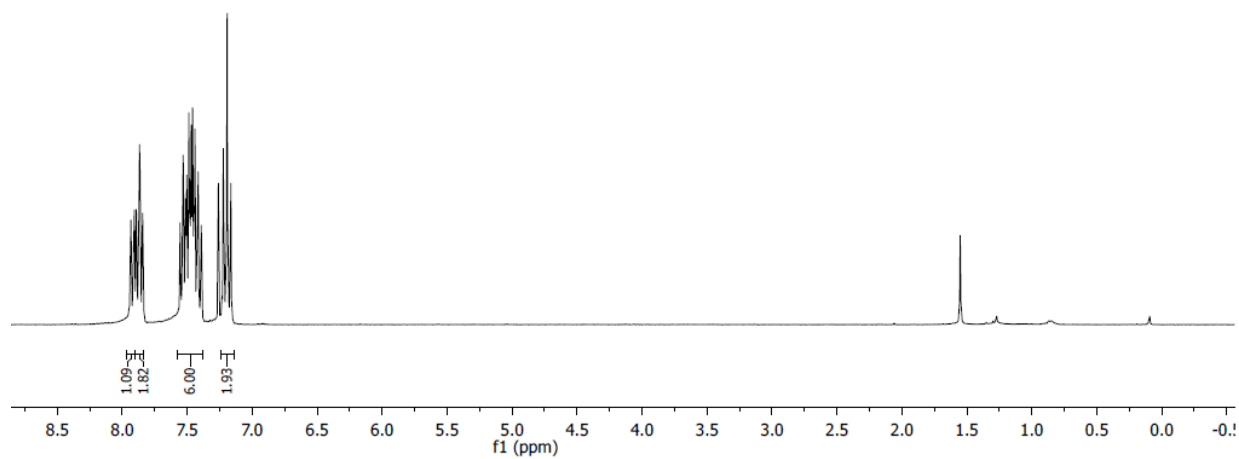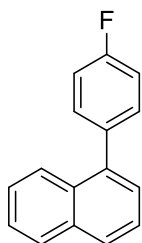

**1-(4-Fluorophenyl)naphthalene (2e)**

<sup>13</sup>C-NMR (75 MHz, CDCl<sub>3</sub>)

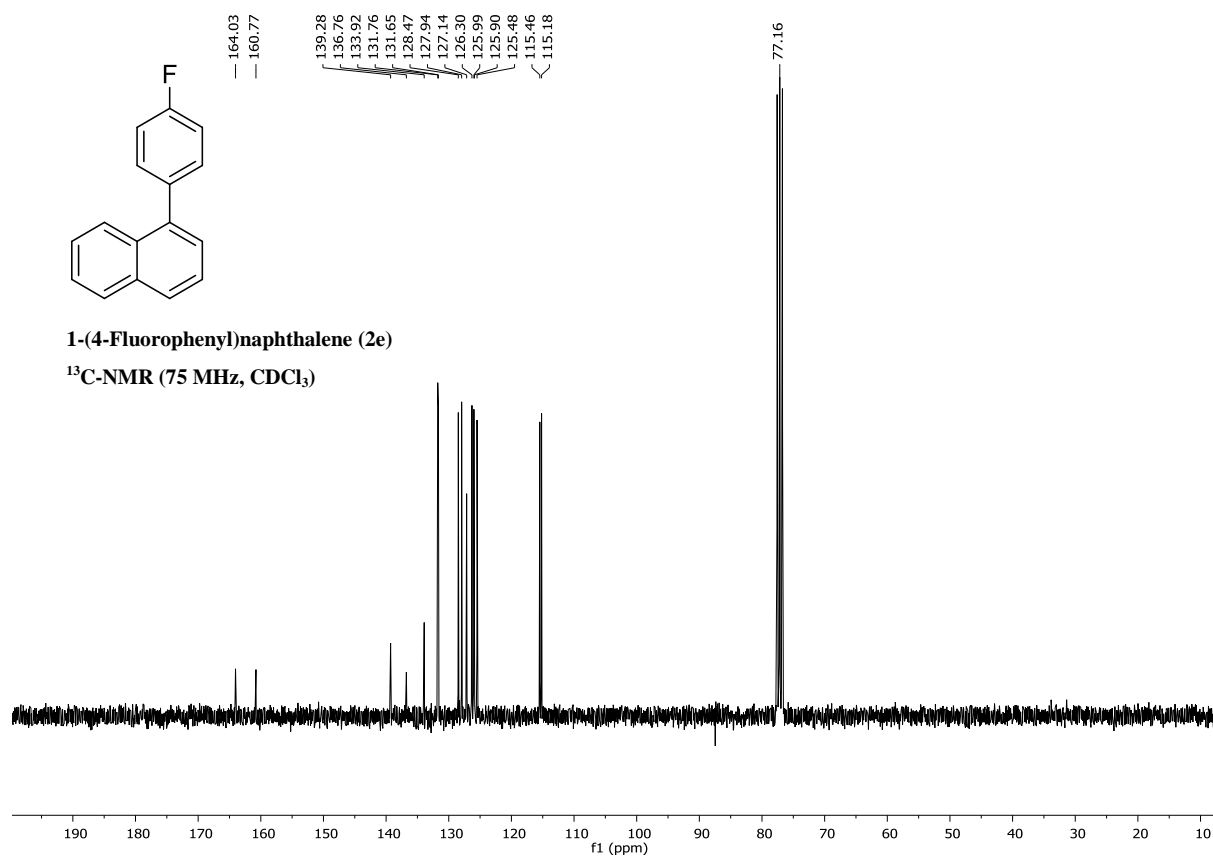

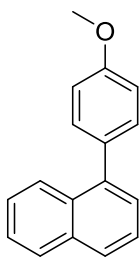

**1-(4-Methoxyphenyl)naphthalene (3g)**

<sup>1</sup>H-NMR (300 MHz, CDCl<sub>3</sub>)

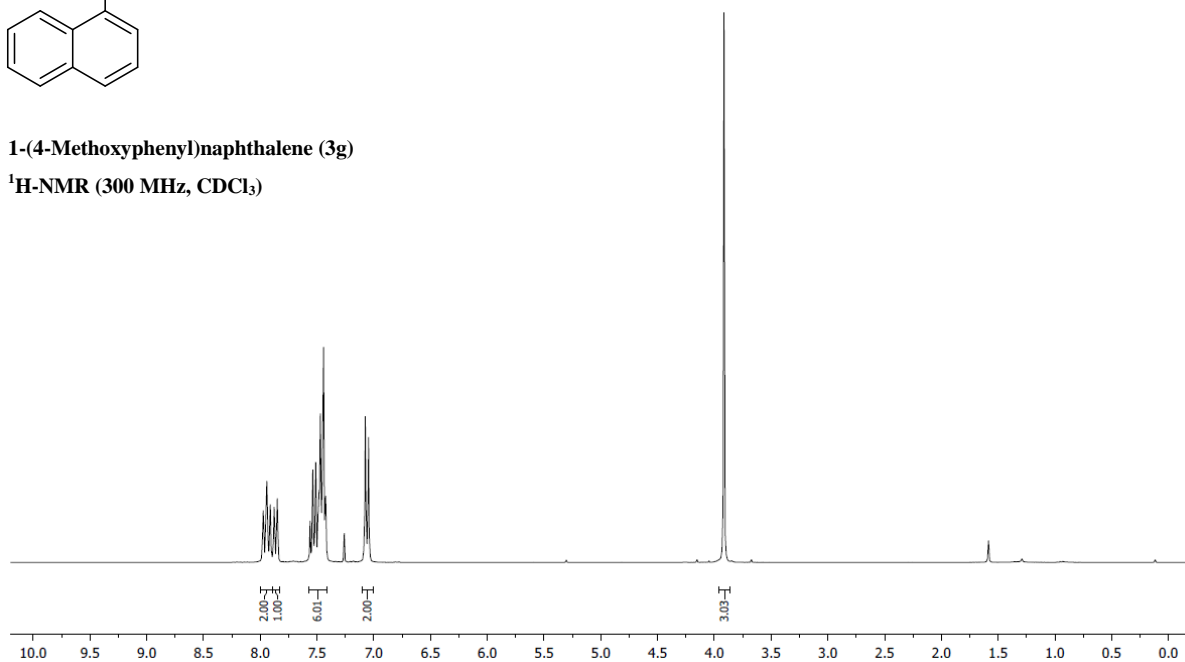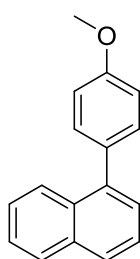

**1-(4-Methoxyphenyl)naphthalene (3g)**

<sup>13</sup>C-NMR (75 MHz, CDCl<sub>3</sub>)

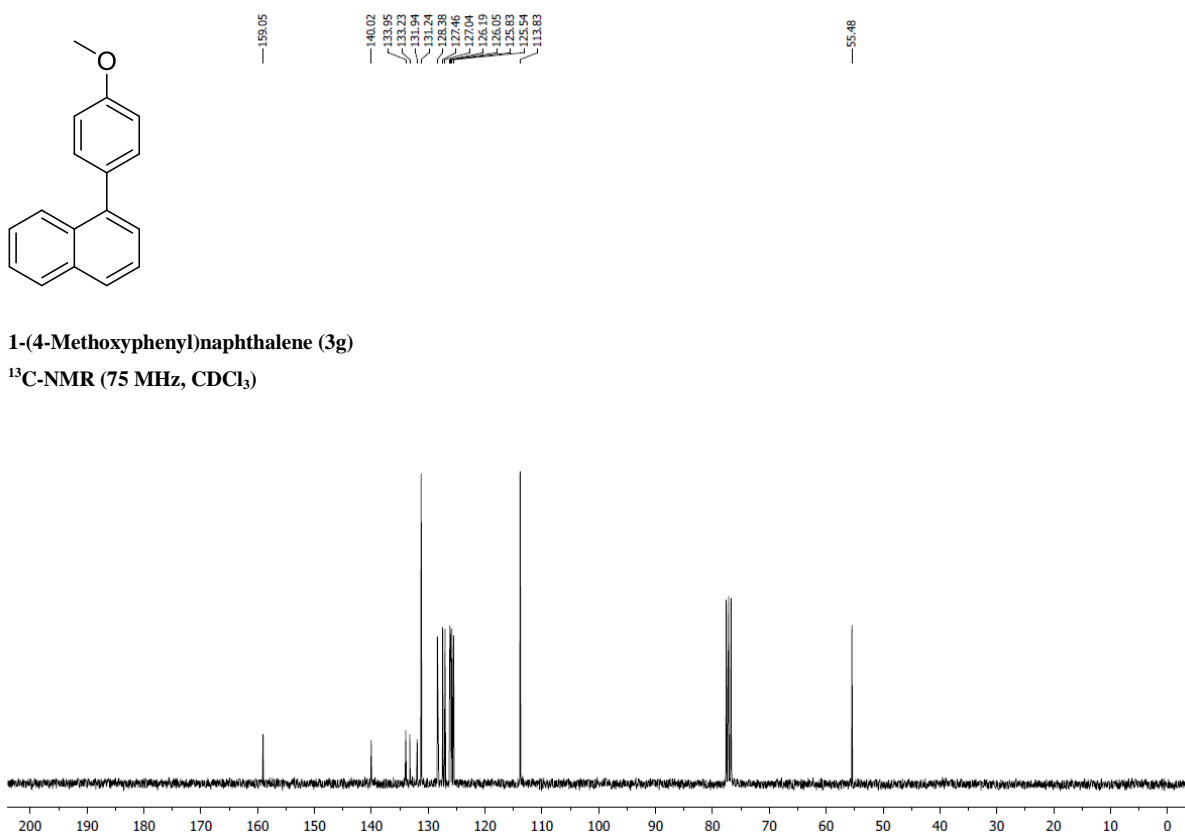

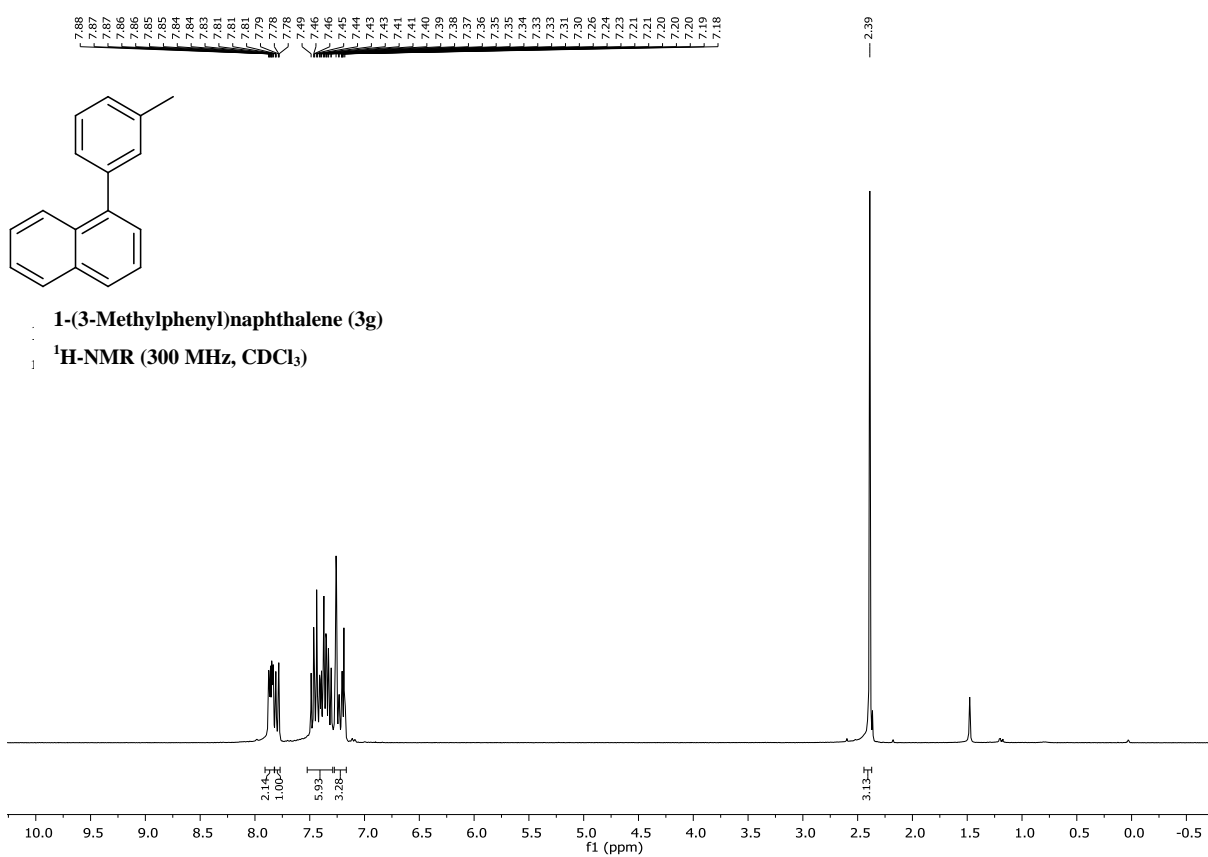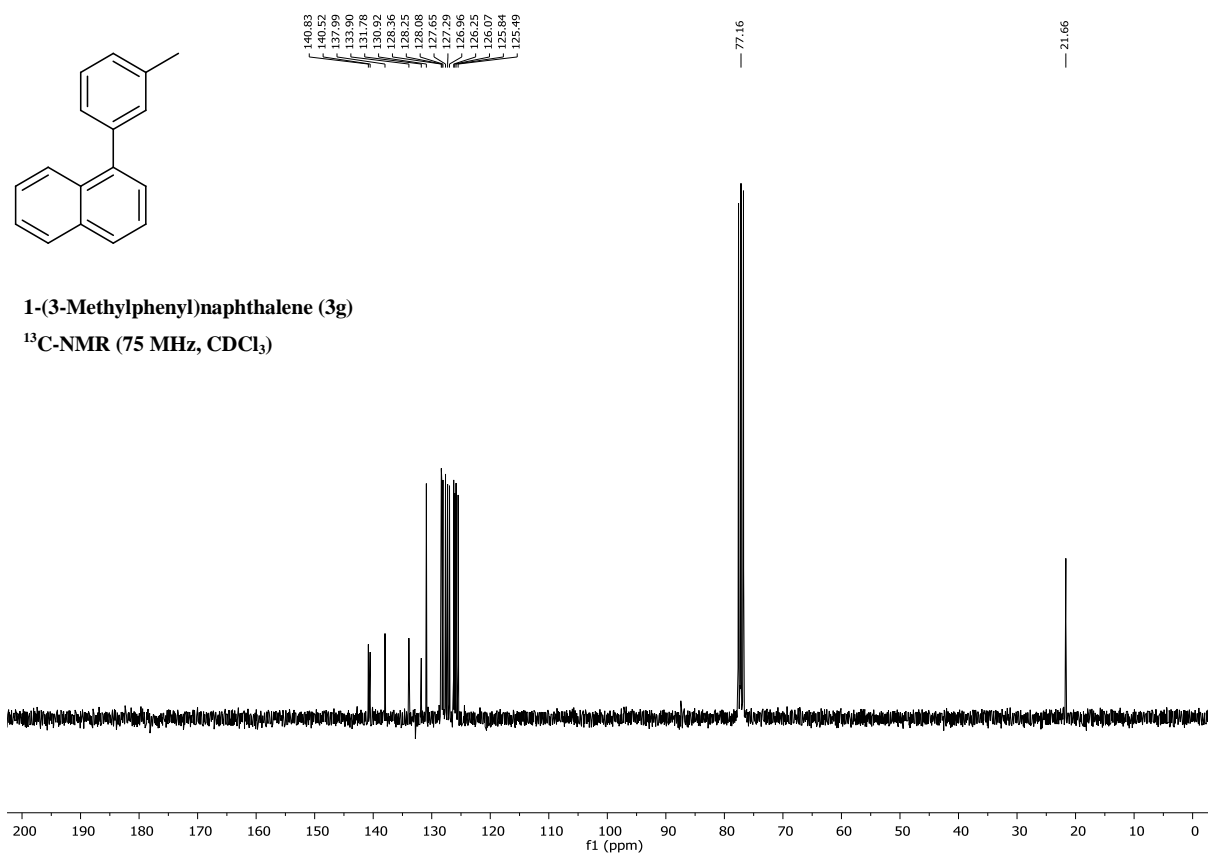

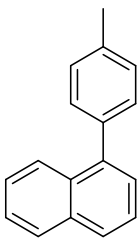

**1-(4-Methylphenyl)naphthalene (3i)**

**<sup>1</sup>H-NMR (400 MHz, CDCl<sub>3</sub>)**

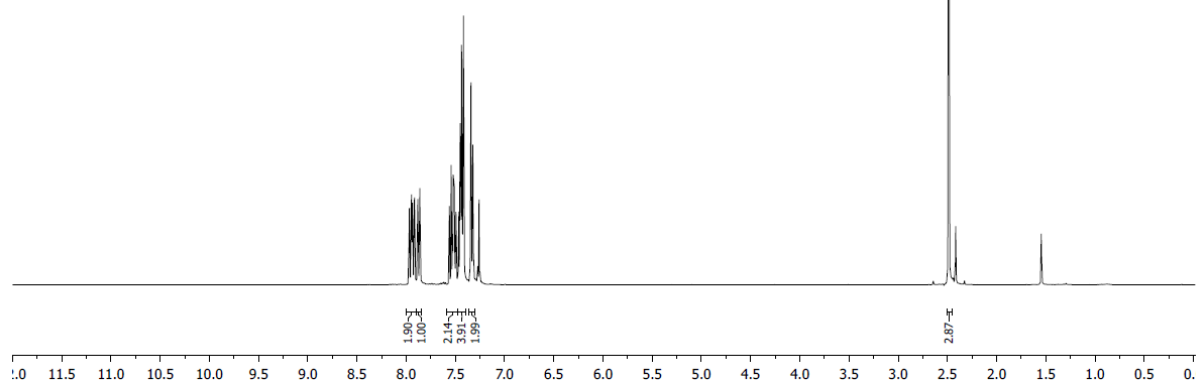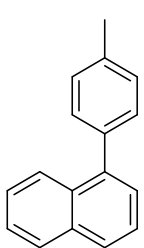

**1-(4-Methylphenyl)naphthalene (3i)**

**<sup>13</sup>C-NMR (101 MHz, CDCl<sub>3</sub>)**

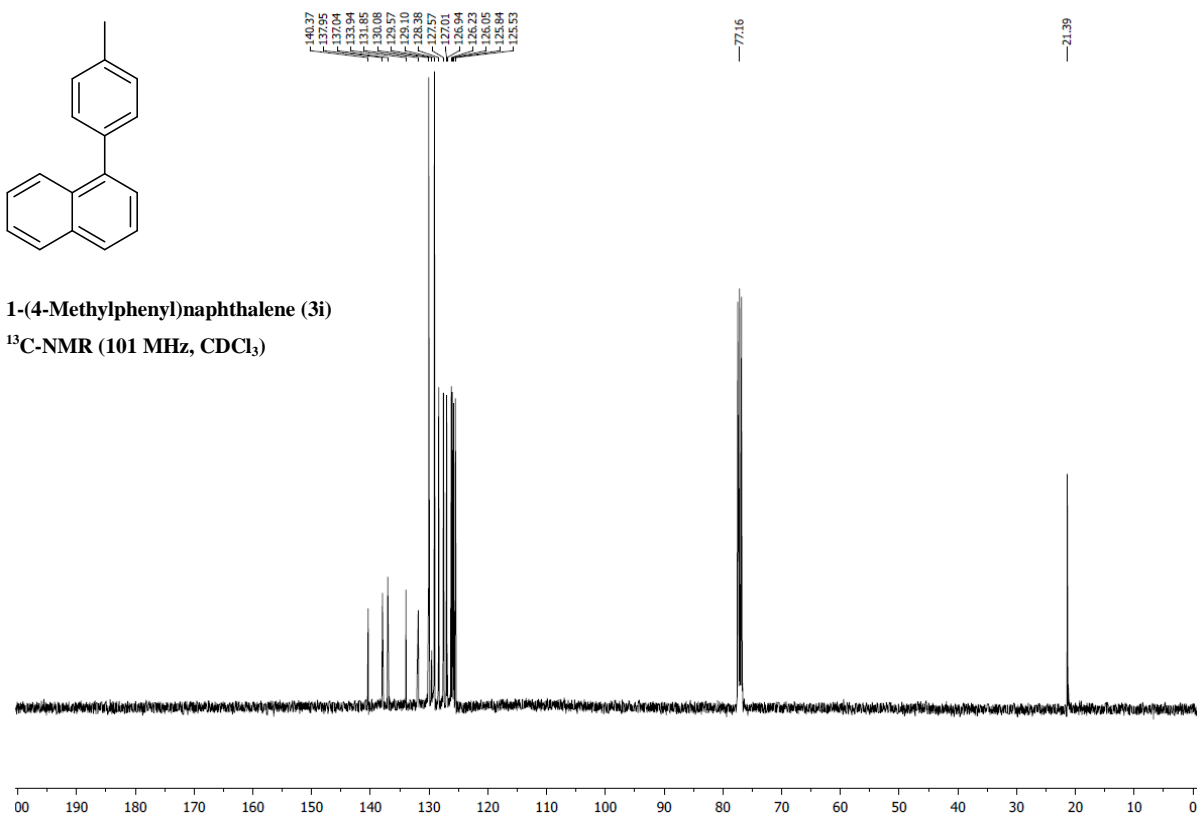

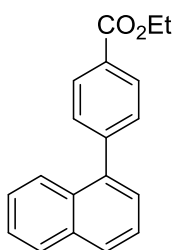

**1-(4-Ethoxycarbonylphenyl)naphthalene (3j)**

<sup>1</sup>H-NMR (400 MHz, CDCl<sub>3</sub>)

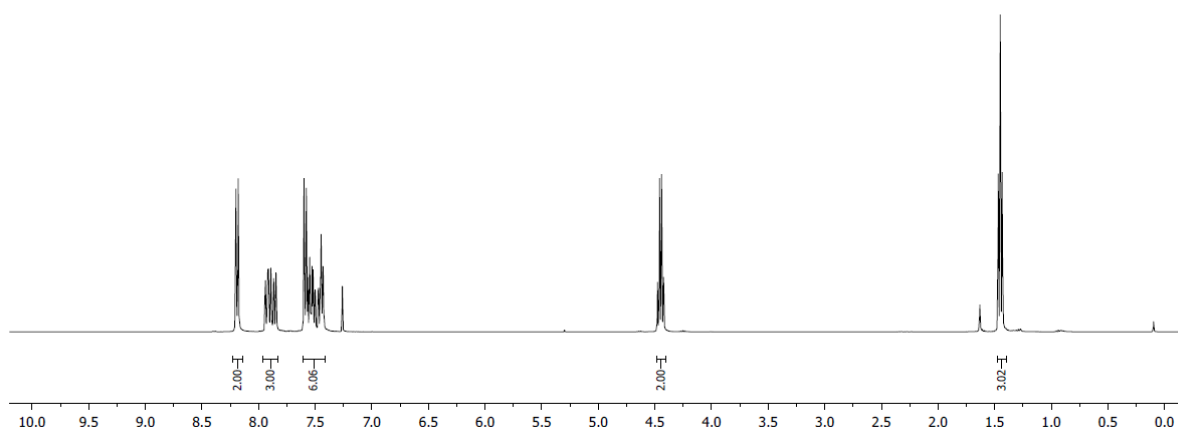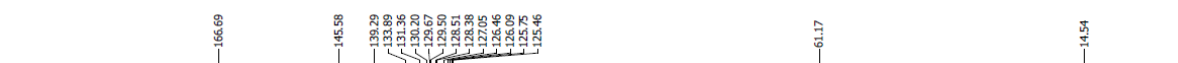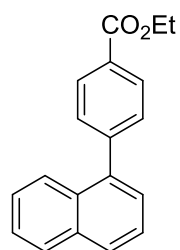

**1-(4-Ethoxycarbonylphenyl)naphthalene (3j)**

<sup>13</sup>C-NMR (101 MHz, CDCl<sub>3</sub>)

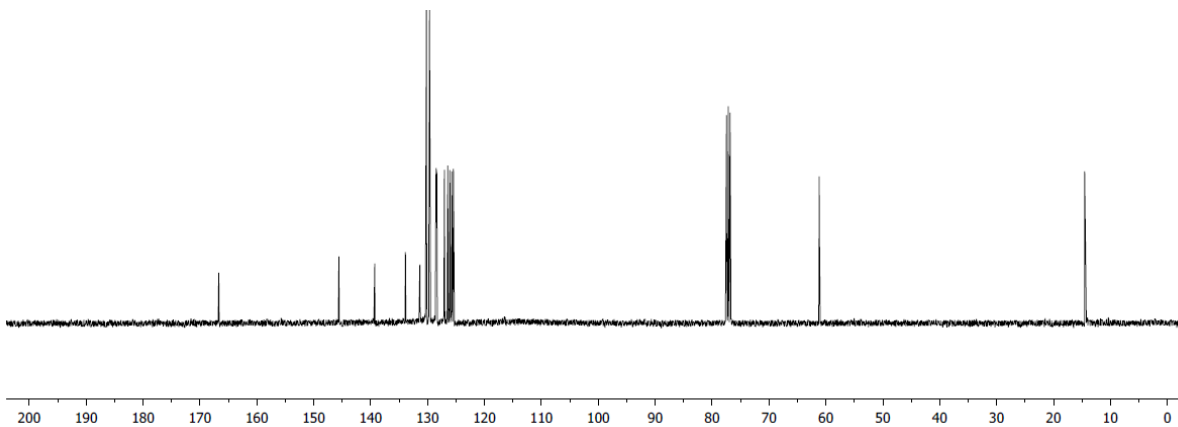

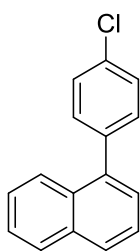

**1-(4-Chlorophenyl)naphthalene (3k)**

**<sup>1</sup>H-NMR (400 MHz, CDCl<sub>3</sub>)**

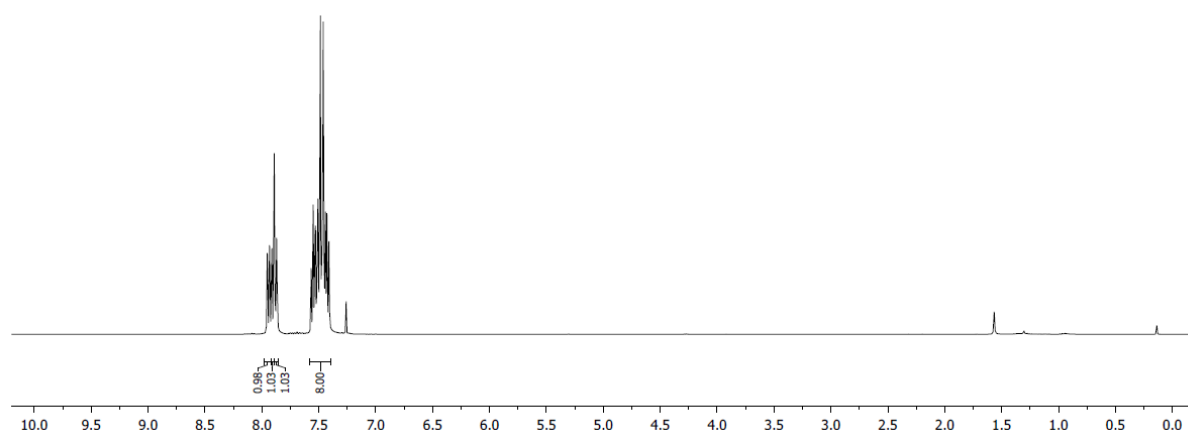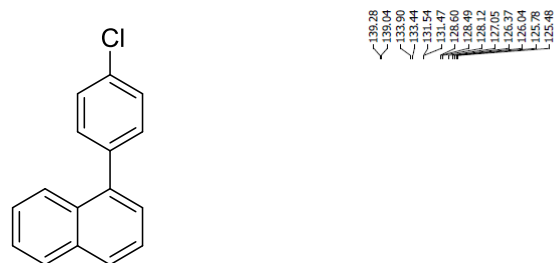

**1-(4-Chlorophenyl)naphthalene (3k)**

**<sup>13</sup>C-NMR (101 MHz, CDCl<sub>3</sub>)**

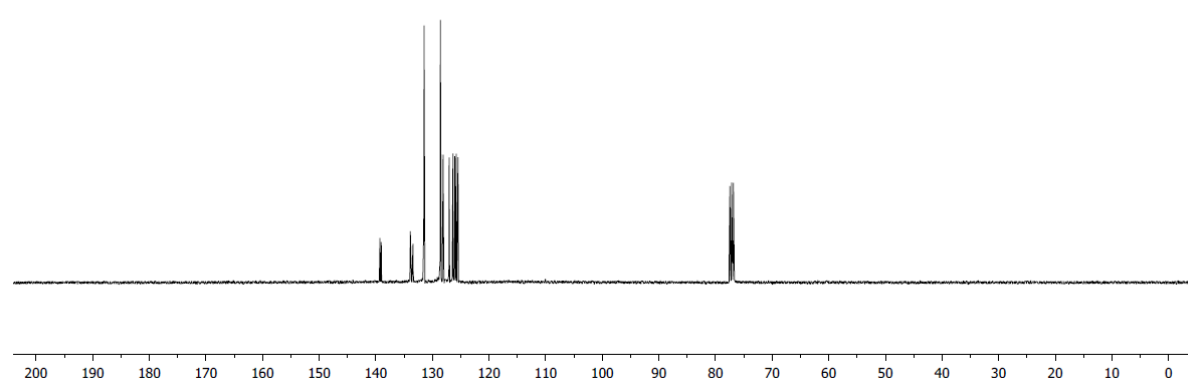

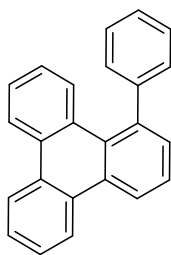

**1-Phenyltriphenylene (5a)**  
<sup>1</sup>H-NMR (300 MHz, CDCl<sub>3</sub>)

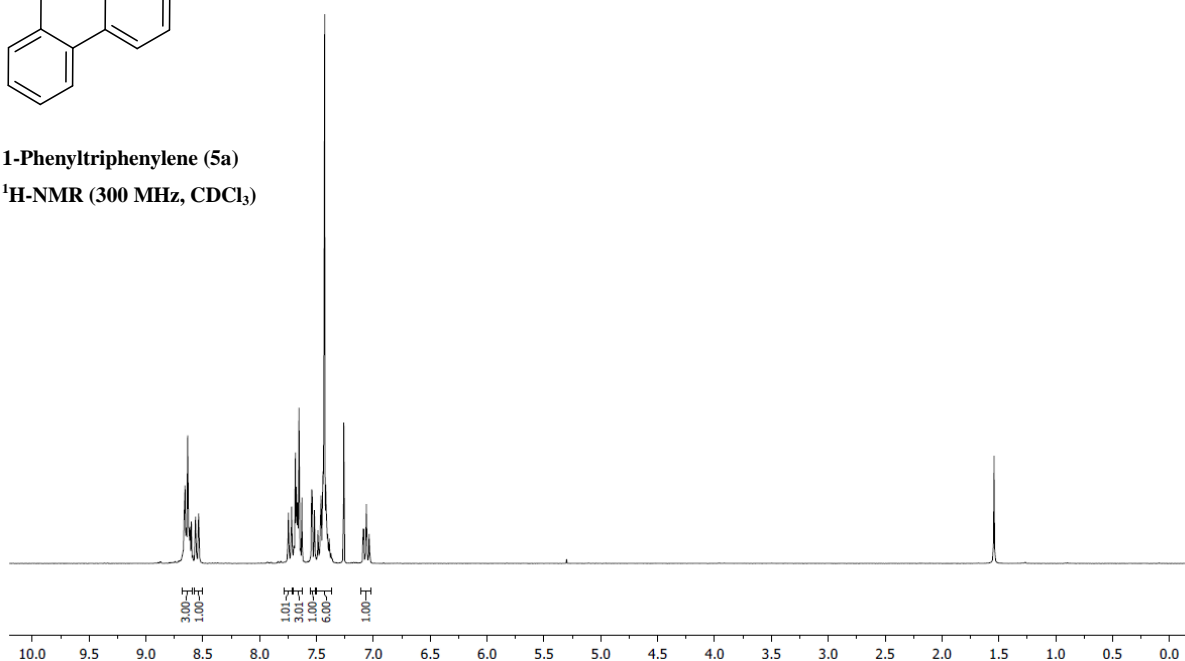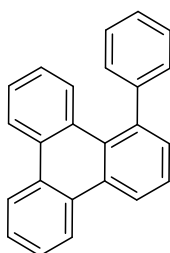

**1-Phenyltriphenylene (5b)**  
<sup>13</sup>C-NMR (101 MHz, CDCl<sub>3</sub>)

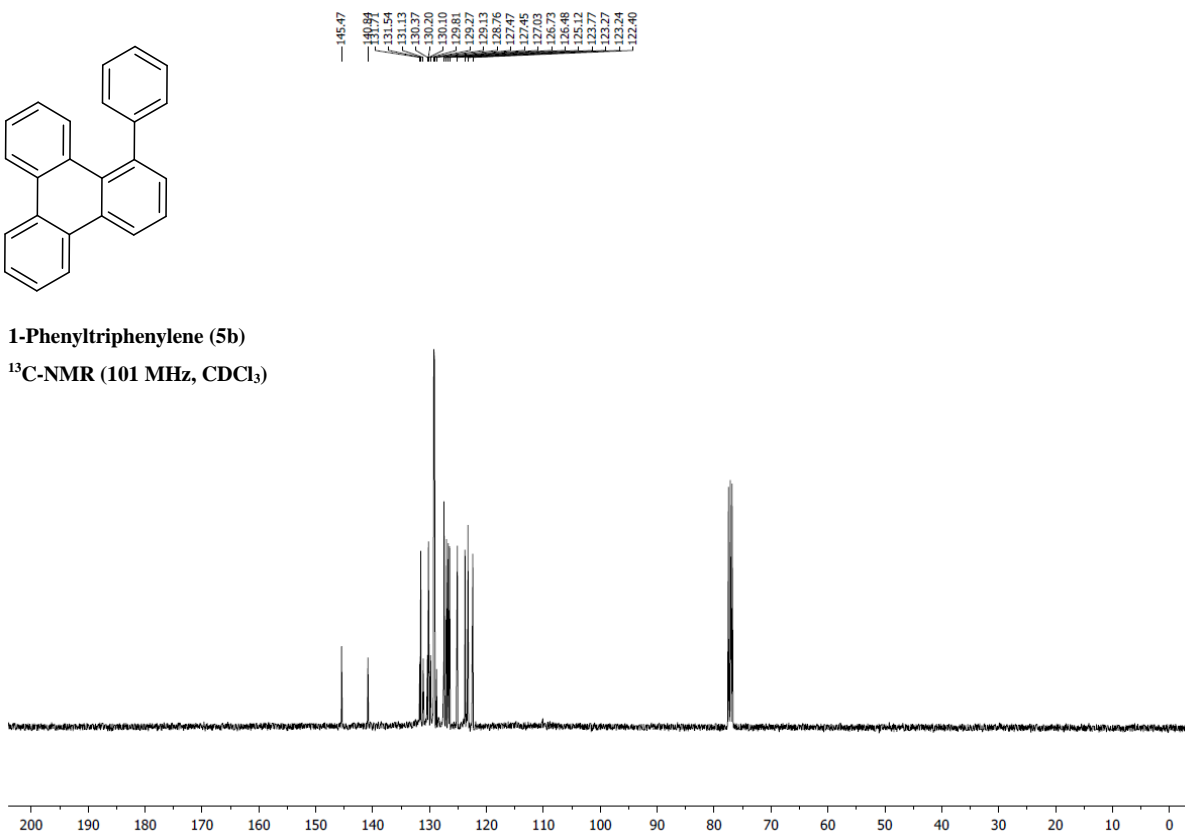



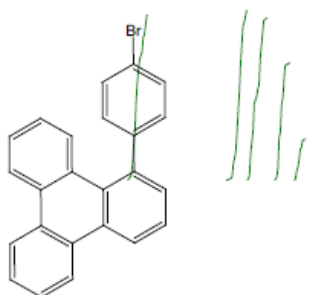

**1-(4-Bromophenyl)triphenylene (5b)**

$^1\text{H-NMR}$  (300 MHz,  $\text{CDCl}_3$ )

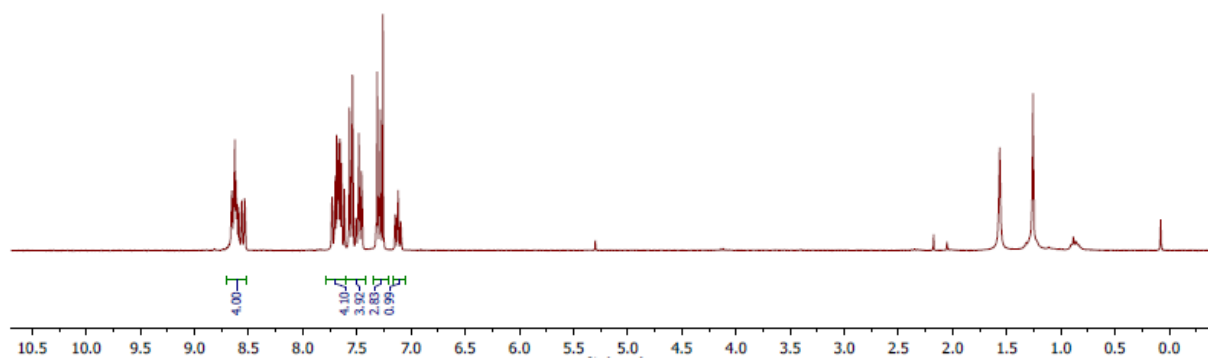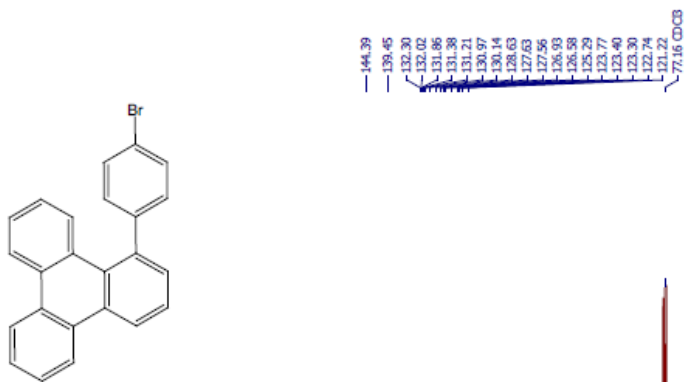

**1-(4-Bromophenyl)triphenylene (5b)**

$^{13}\text{C-NMR}$  (75 MHz,  $\text{CDCl}_3$ )

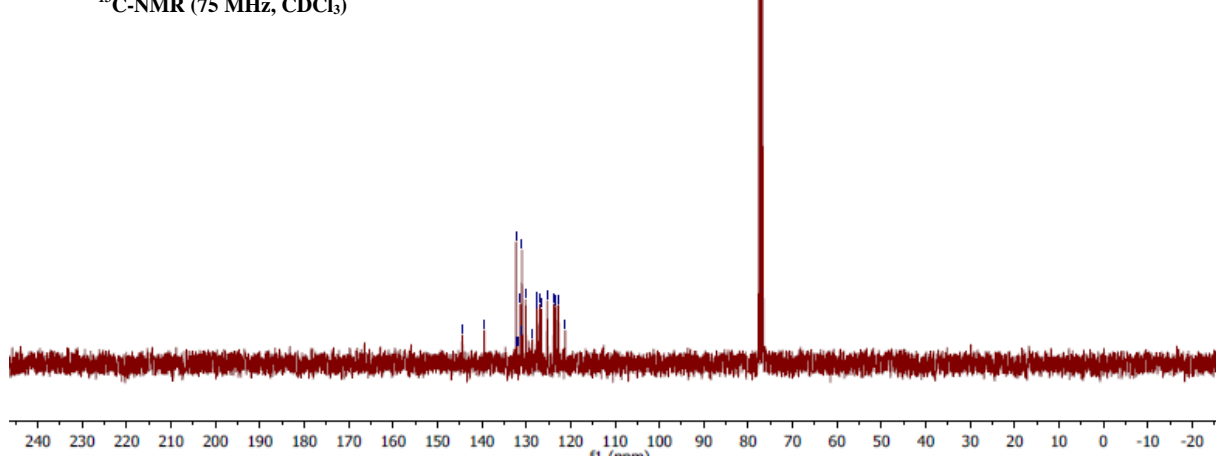

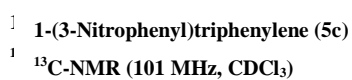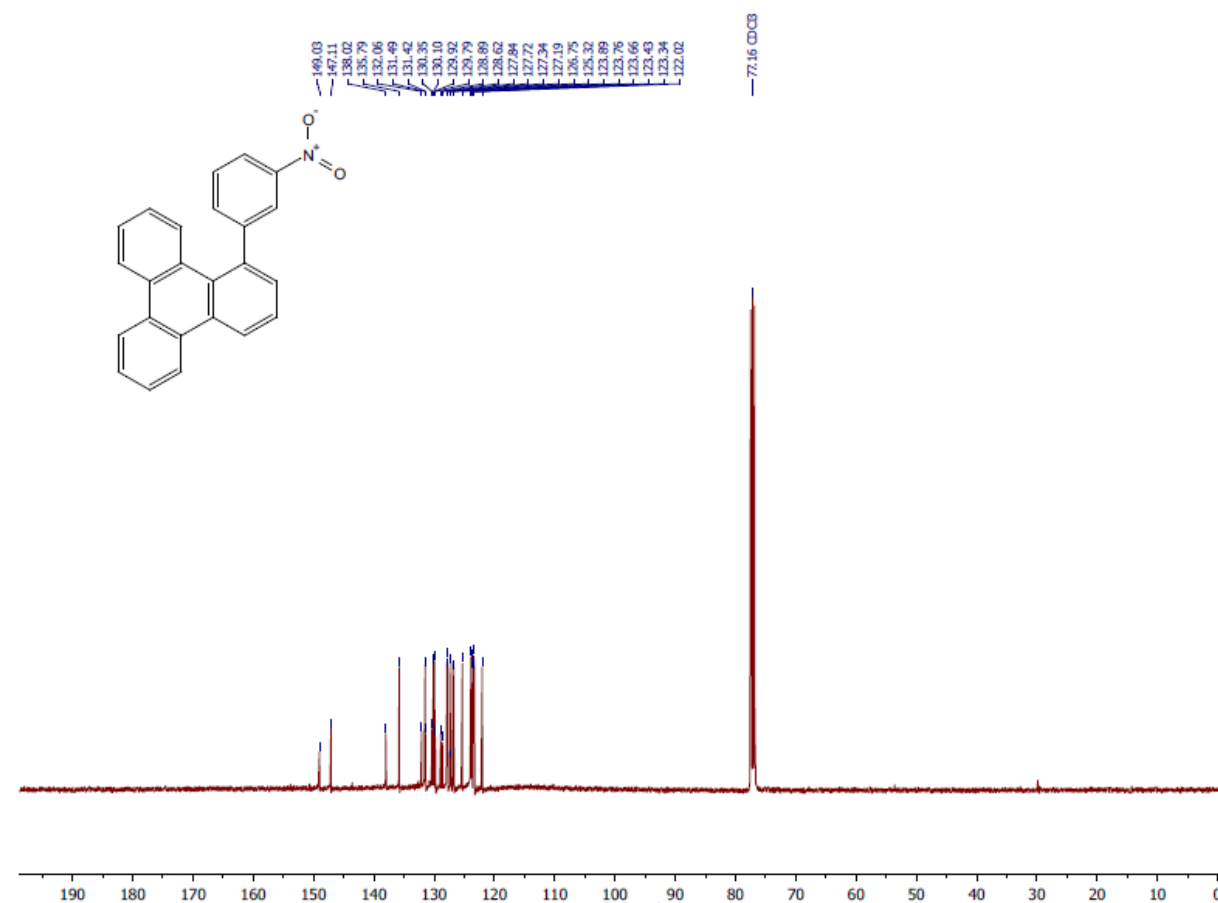

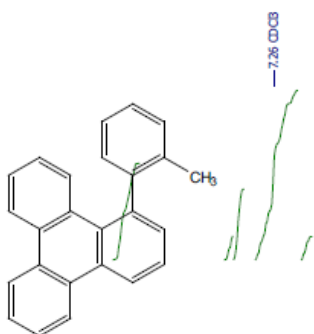

1-(2-Methylphenyl)triphenylene (5d)

$^1\text{H-NMR}$  (300 MHz,  $\text{CDCl}_3$ )

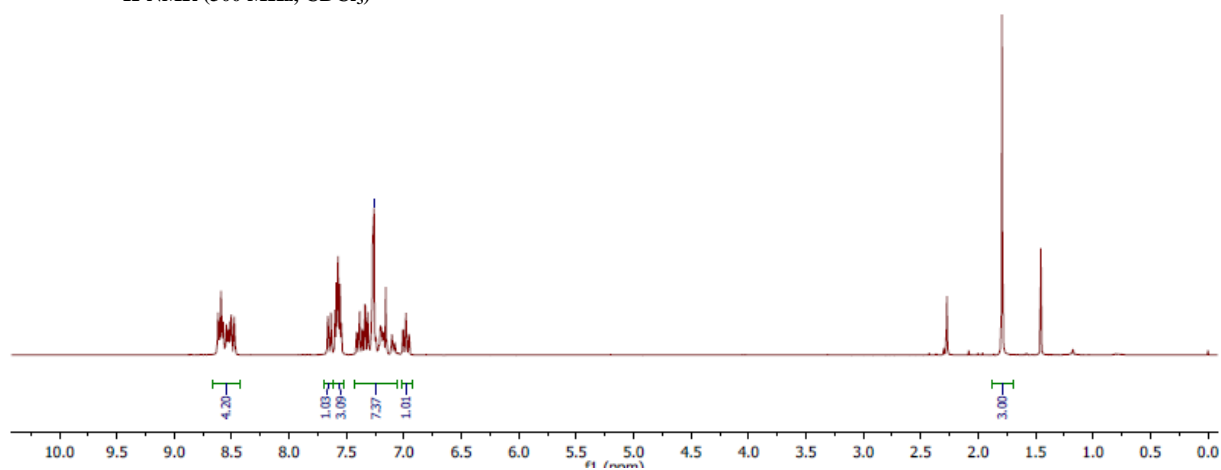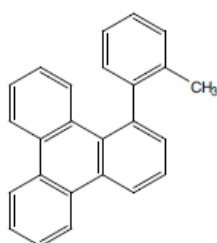

1-(2-Methylphenyl)triphenylene (5d)

$^{13}\text{C-NMR}$  (75 MHz,  $\text{CDCl}_3$ )

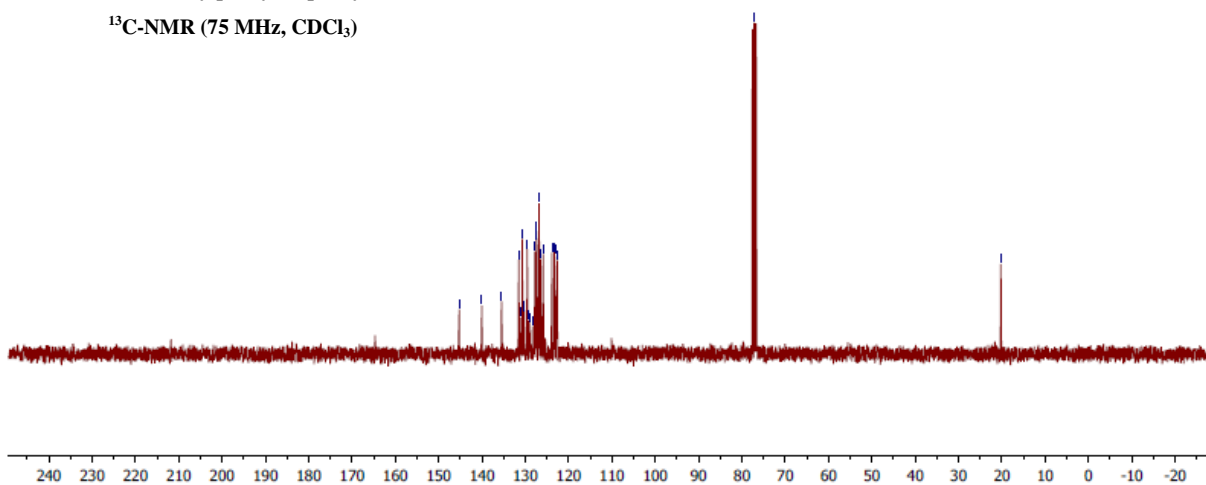

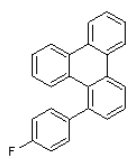

**1-(4-Fluorophenyl)triphenylene (5e)**

$^{13}\text{C}$ -NMR (75 MHz,  $\text{CDCl}_3$ )

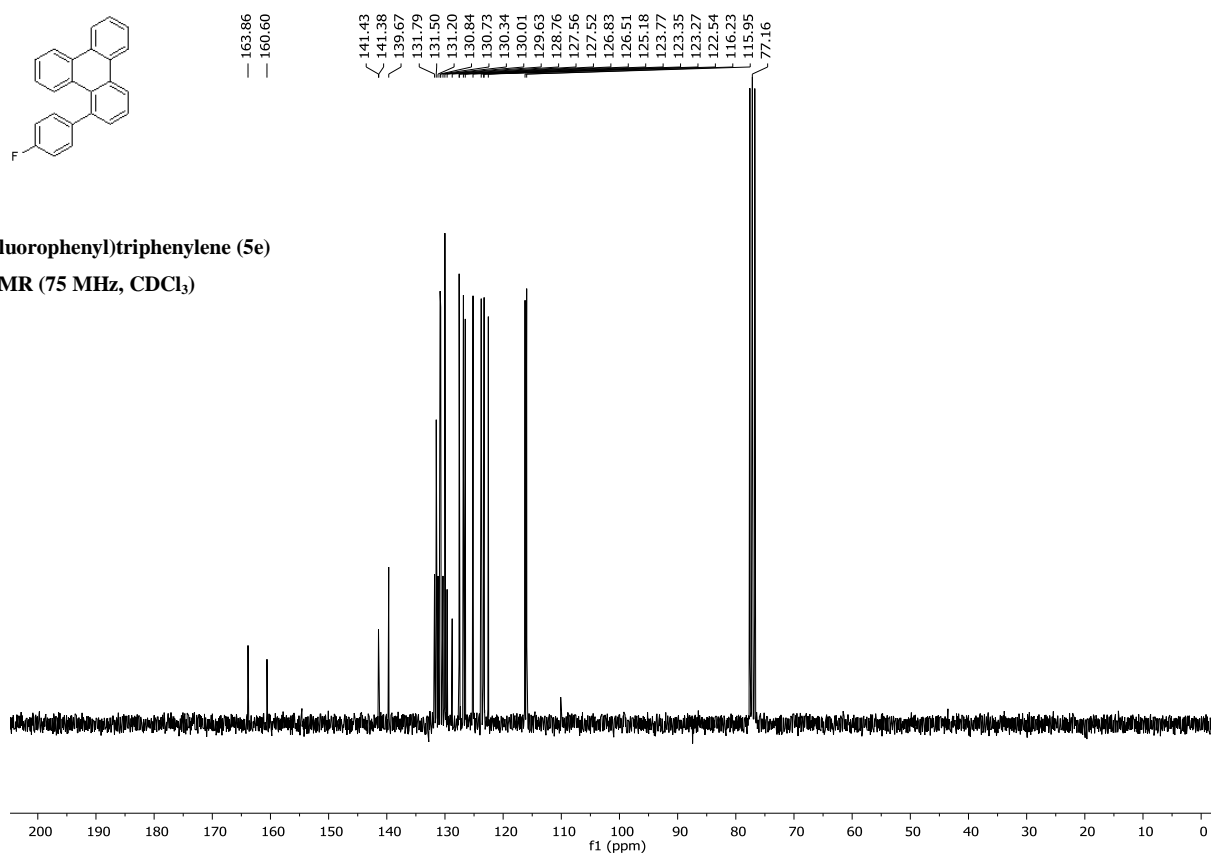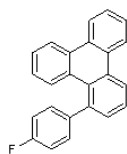

**1-(4-Fluorophenyl)triphenylene (5e)**

$^1\text{H}$ -NMR (300 MHz,  $\text{CDCl}_3$ )

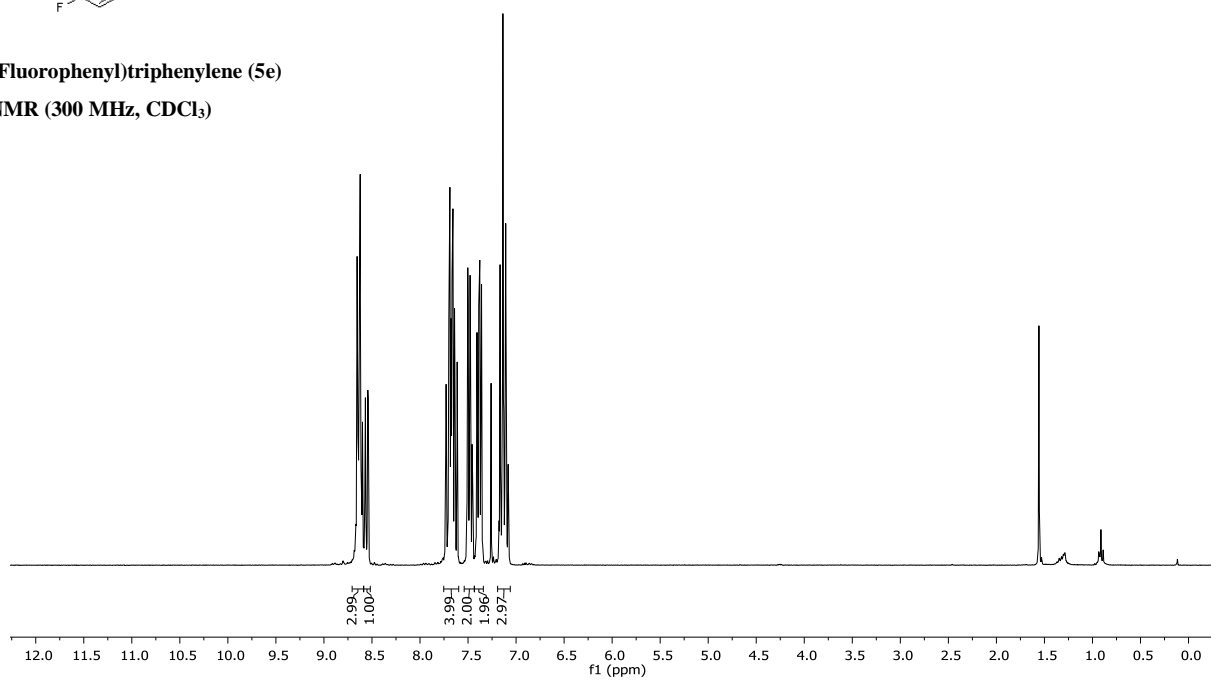

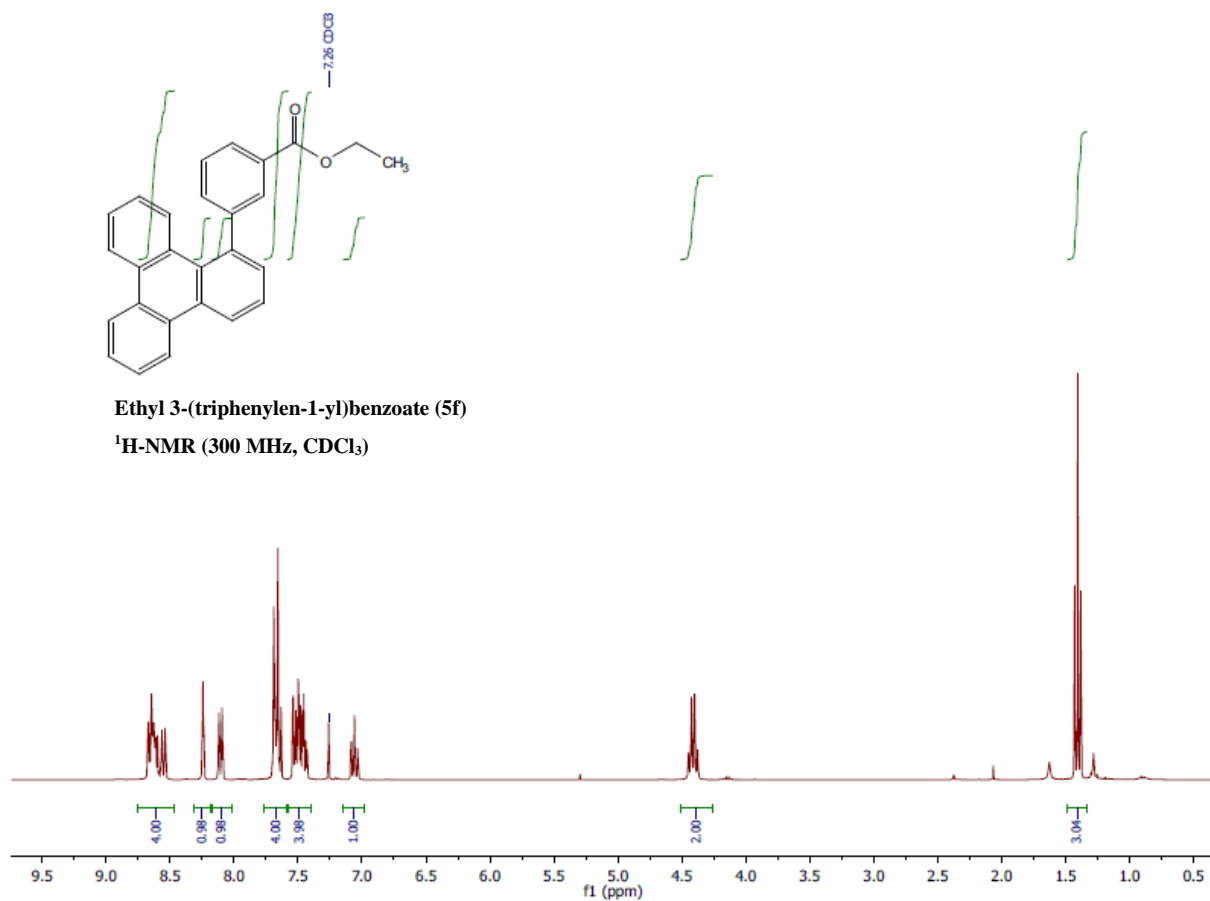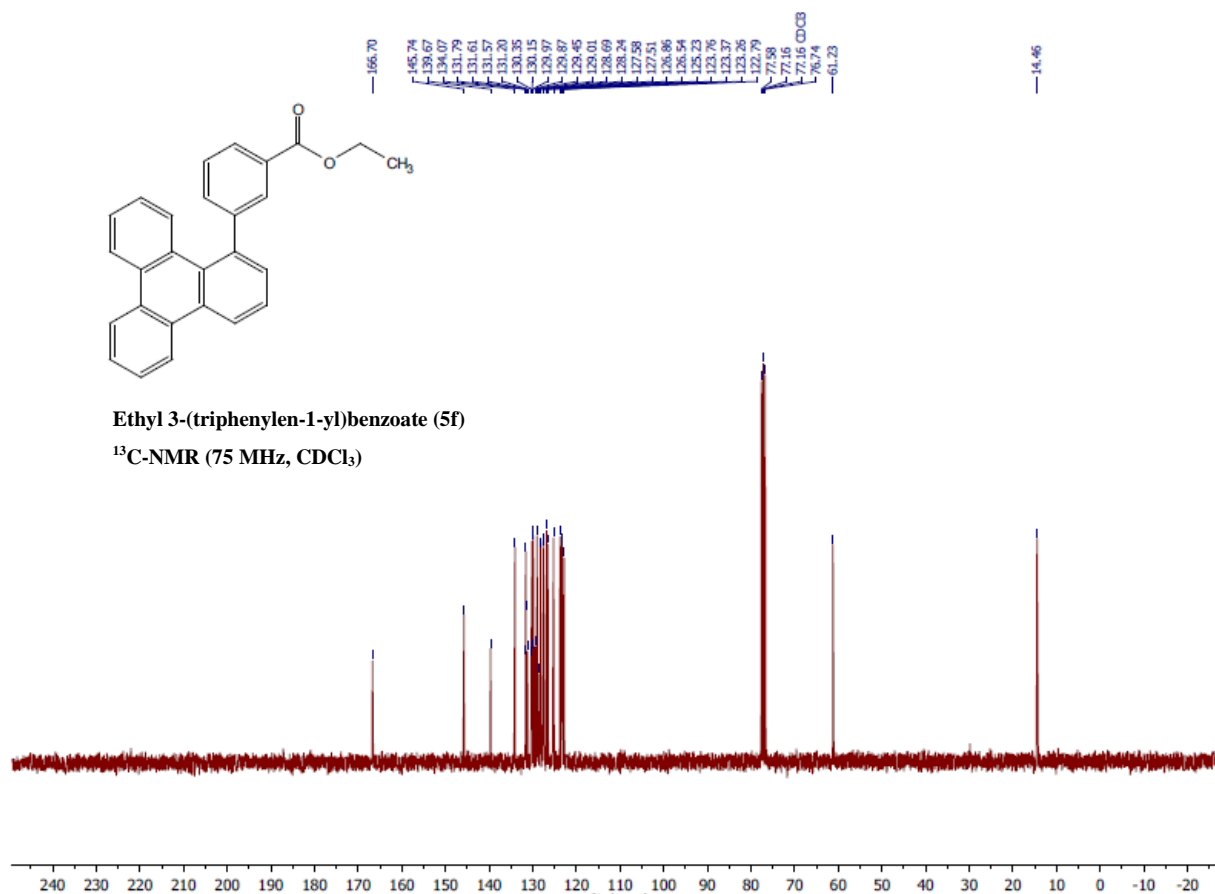

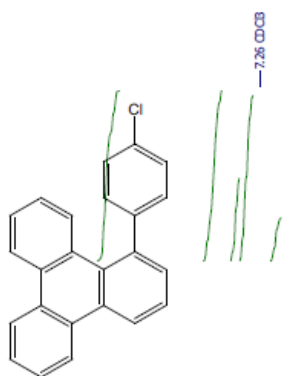

1-(4-Chlorophenyl)triphenylene (5g)

$^1\text{H-NMR}$  (300 MHz,  $\text{CDCl}_3$ )

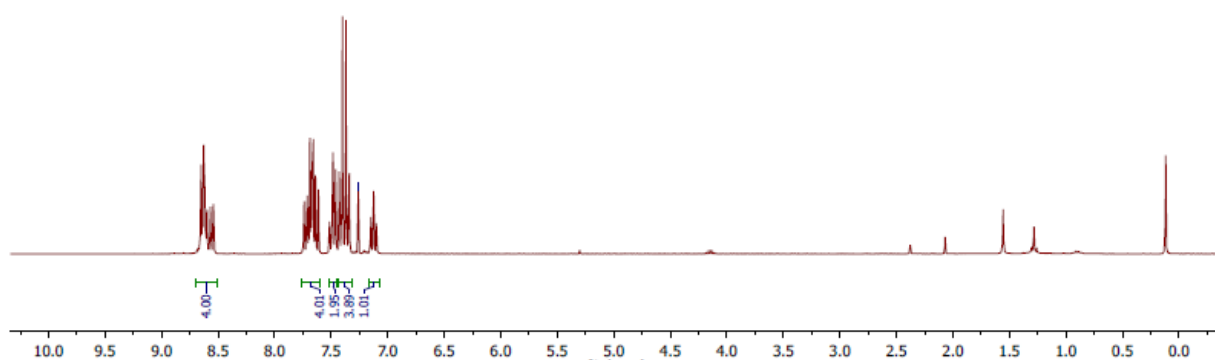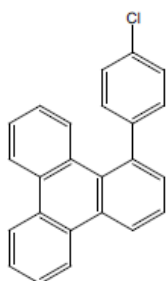

1-(4-Chlorophenyl)triphenylene (5g)

$^{13}\text{C-NMR}$  (101 MHz,  $\text{CDCl}_3$ )

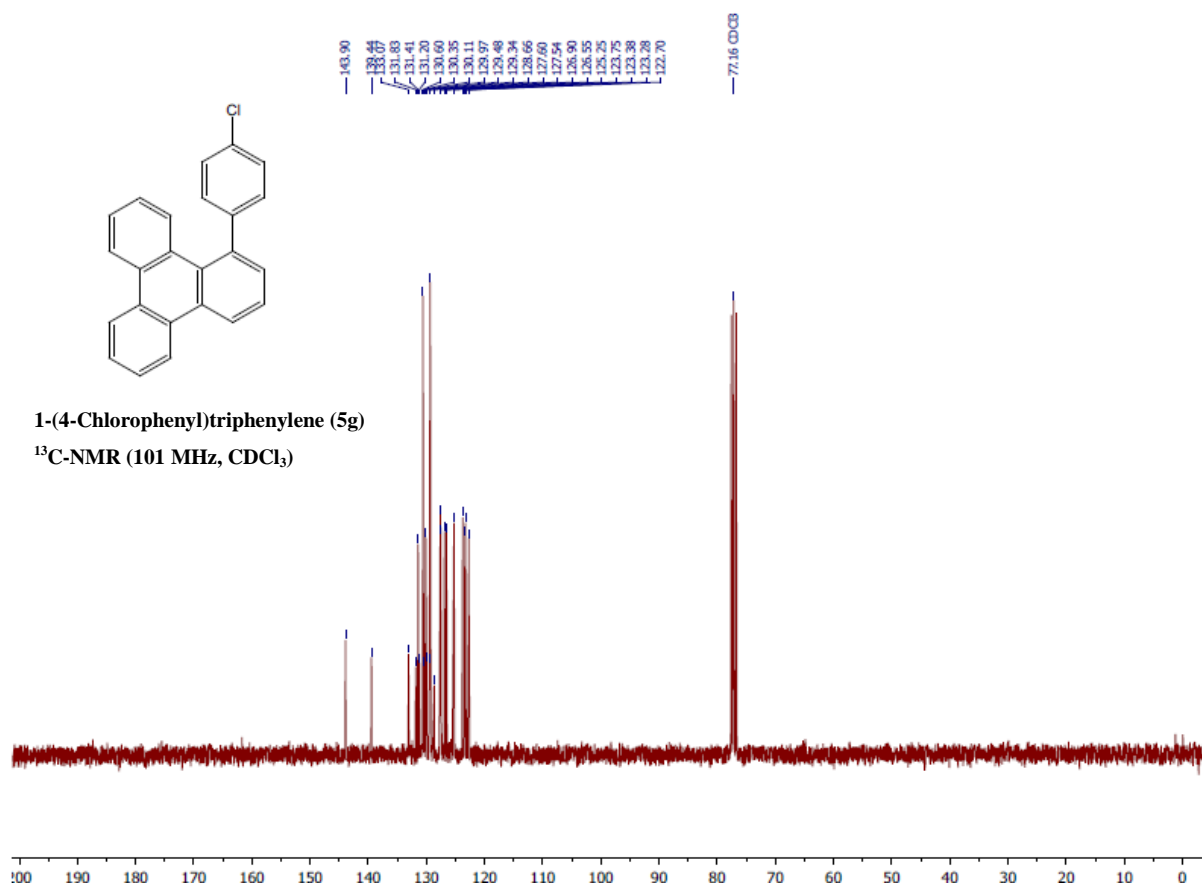

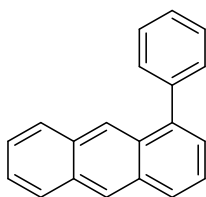

**1-Phenylanthracene (6a)**

**<sup>1</sup>H-NMR (400 MHz, CDCl<sub>3</sub>)**

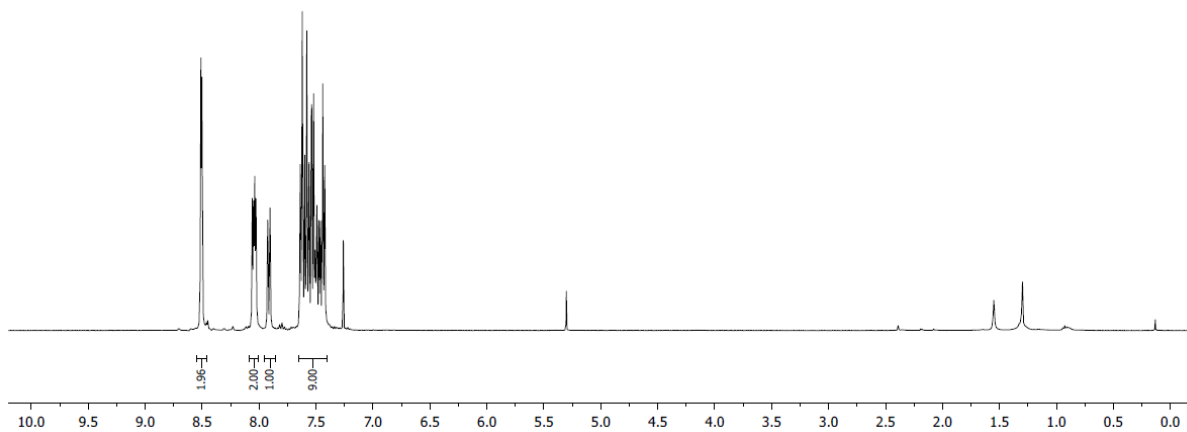

141.05  
137.15  
132.17  
131.86  
131.58  
130.40  
130.27  
128.73  
128.73  
128.09  
128.00  
127.51  
126.68  
126.34  
125.73  
125.41  
125.11  
125.05

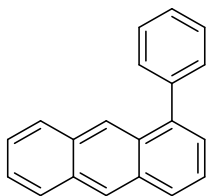

**1-Phenylanthracene (6a)**

**<sup>13</sup>C-NMR (101 MHz, CDCl<sub>3</sub>)**

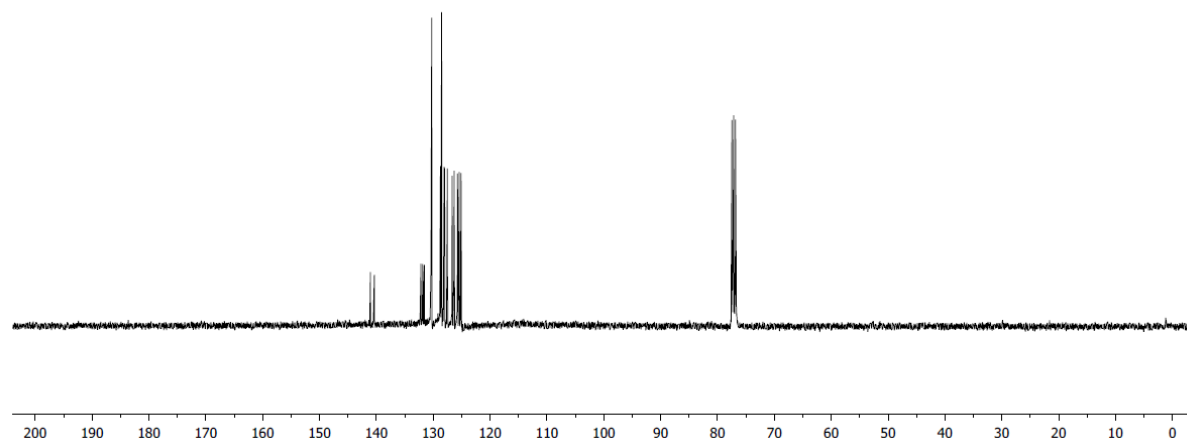

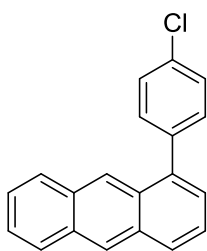

**1-(4-Chlorophenyl)anthracene (6b)**

<sup>1</sup>H-NMR (300 MHz, CDCl<sub>3</sub>)

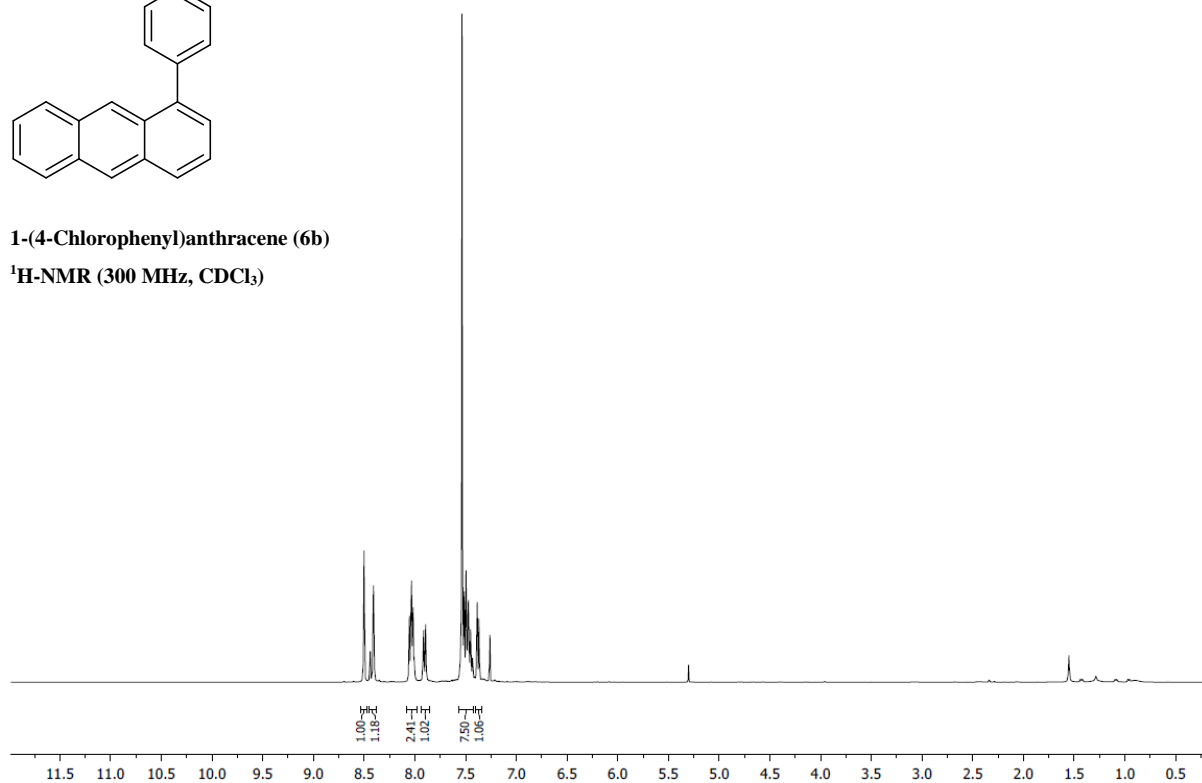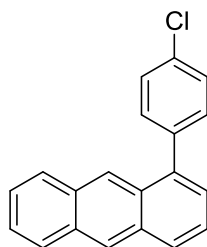

**1-(4-Chlorophenyl)anthracene (6b)**

<sup>13</sup>C-NMR (101 MHz, CDCl<sub>3</sub>)

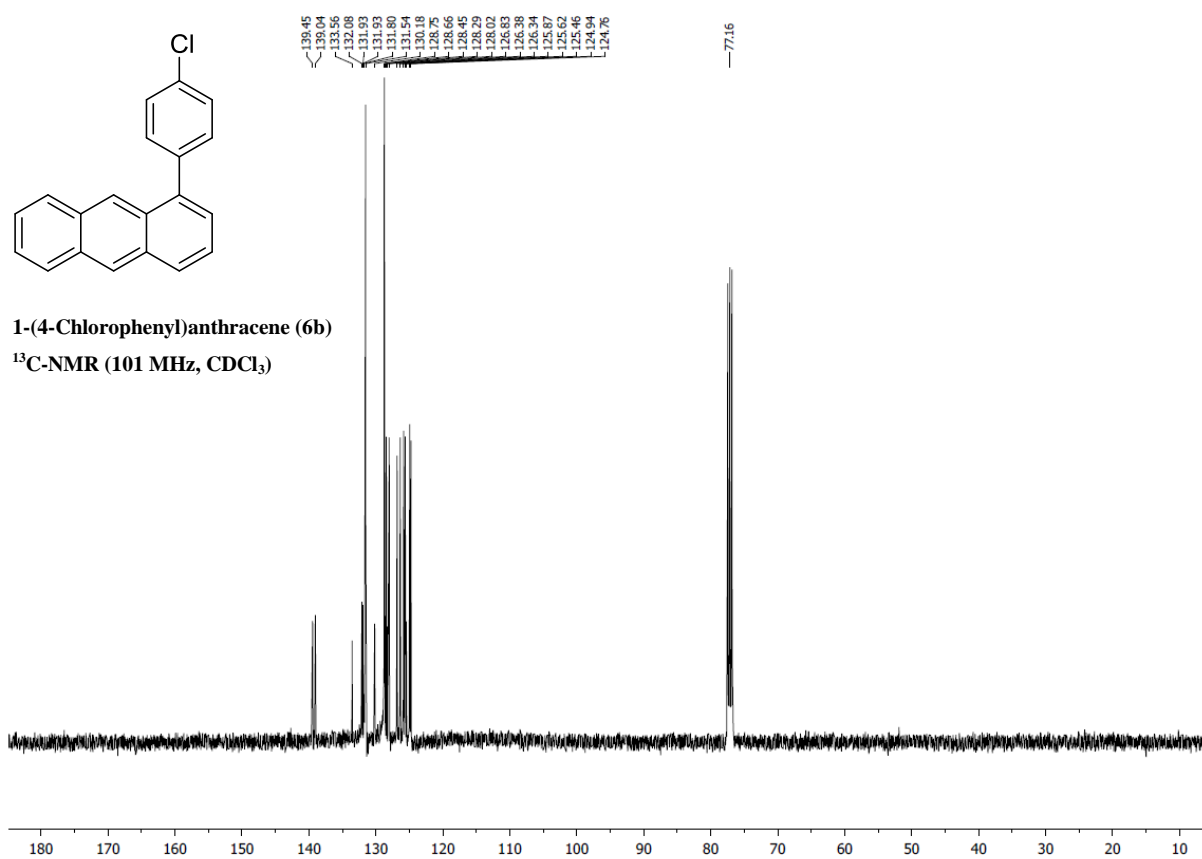



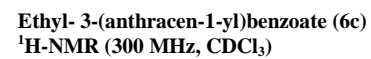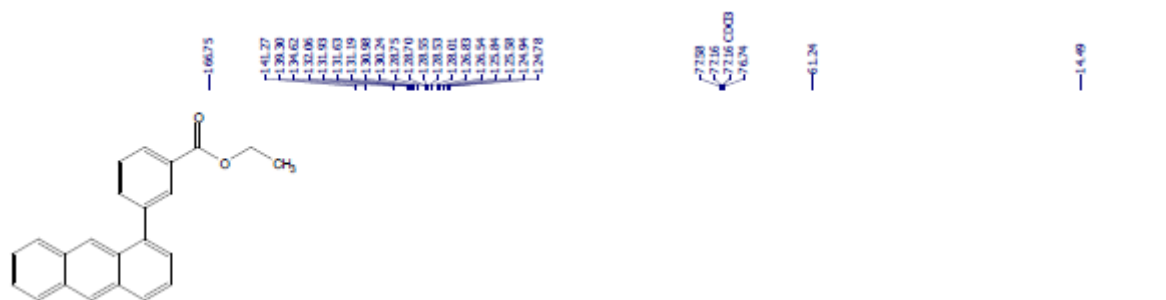

**Ethyl- 3-(anthracen-1-yl)benzoate (6c)**  
**<sup>13</sup>C-NMR (101 MHz, CDCl<sub>3</sub>)**

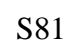

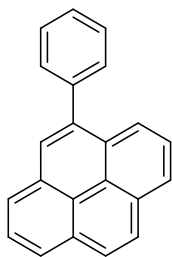

**4-Phenylpyrene (7a)**

<sup>1</sup>H-NMR (300 MHz, CDCl<sub>3</sub>)

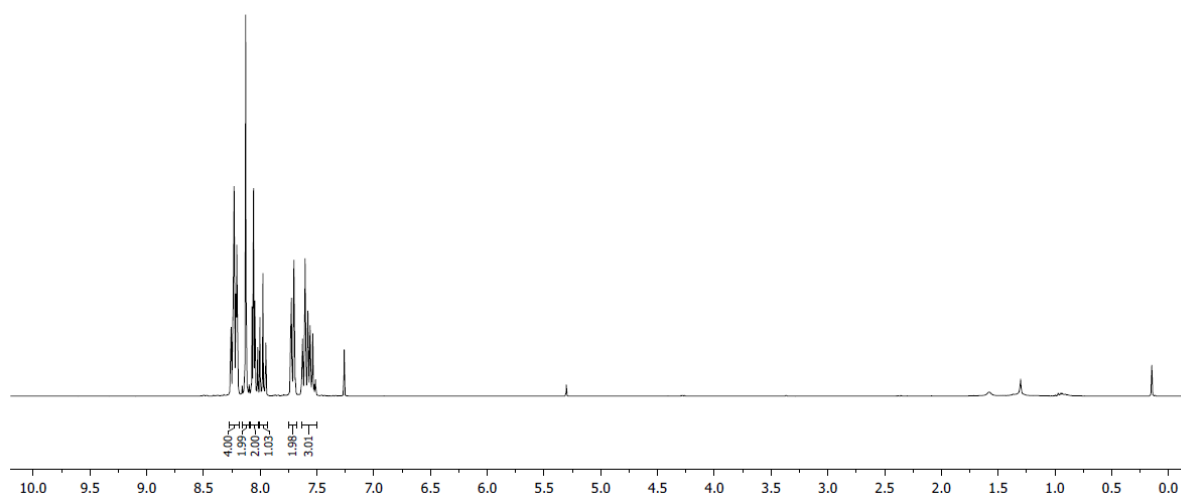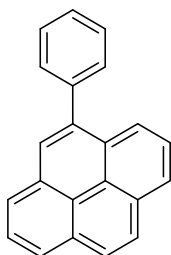

140.99  
138.55  
131.47  
131.22  
130.93  
130.23  
128.56  
127.93  
127.76  
127.65  
127.39  
126.24  
125.85  
125.32  
125.13  
125.10  
124.99  
124.33  
124.03

**4-Phenylpyrene (7a)**

<sup>13</sup>C-NMR (75 MHz, CDCl<sub>3</sub>)

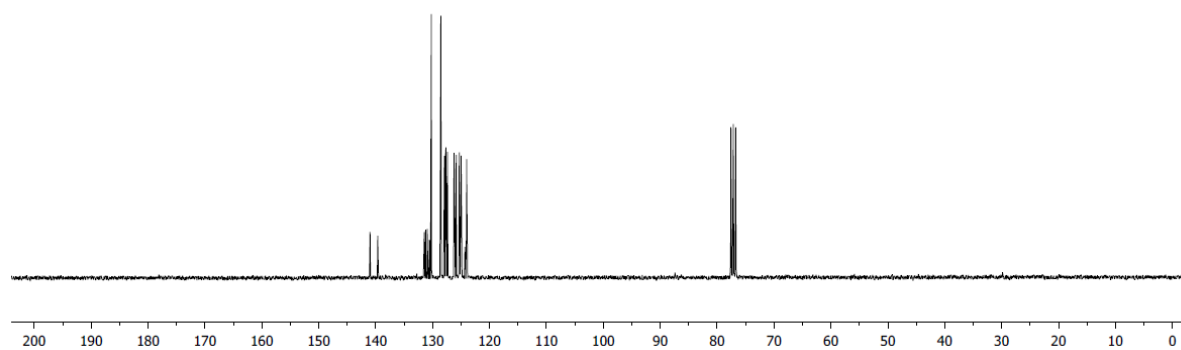

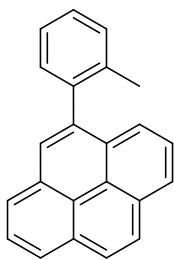

**4-(2-Methylphenyl)pyrene (7b)**

<sup>1</sup>H-NMR (300 MHz, CDCl<sub>3</sub>)

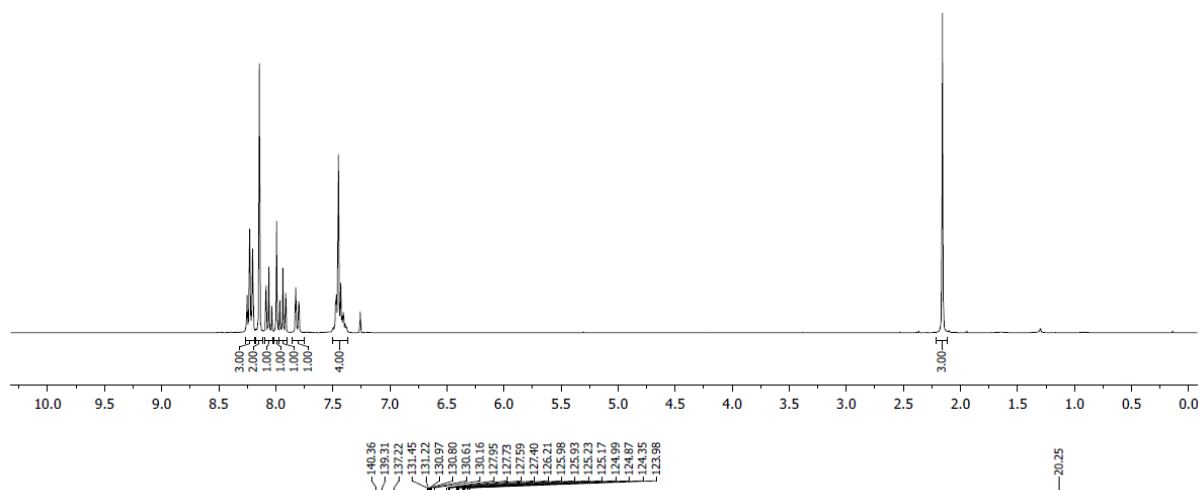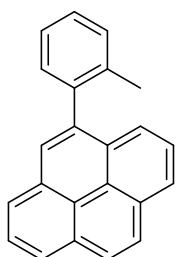

**4-(2-Methylphenyl)pyrene (7b)**

<sup>13</sup>C-NMR (75 MHz, CDCl<sub>3</sub>)

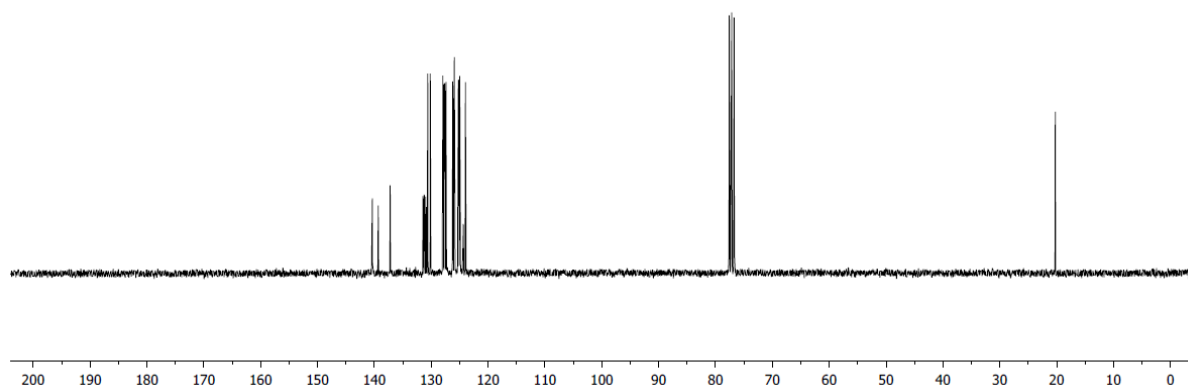

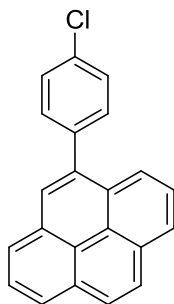

**4-(4-Chlorophenyl)pyrene (7c)**

<sup>1</sup>H-NMR (400 MHz, CDCl<sub>3</sub>)

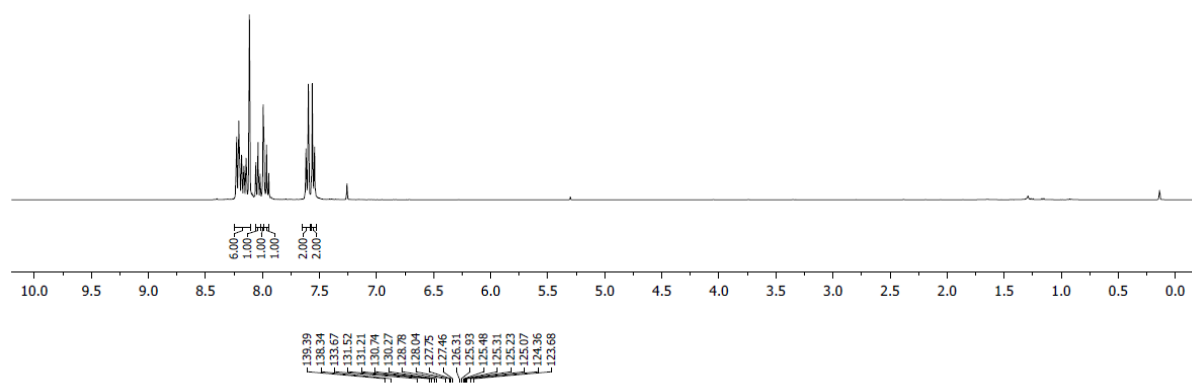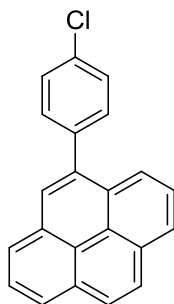

**4-(4-Chlorophenyl)pyrene (7c)**

<sup>13</sup>C-NMR (100 MHz, CDCl<sub>3</sub>)

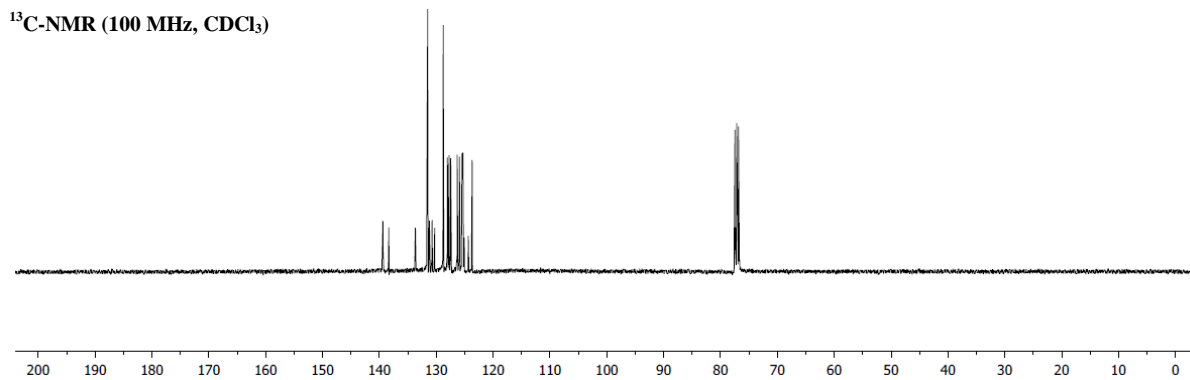

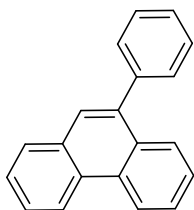

**9-Phenylphenanthrene (8) + two regioisomers**

**<sup>1</sup>H-NMR (300 MHz, CDCl<sub>3</sub>)**

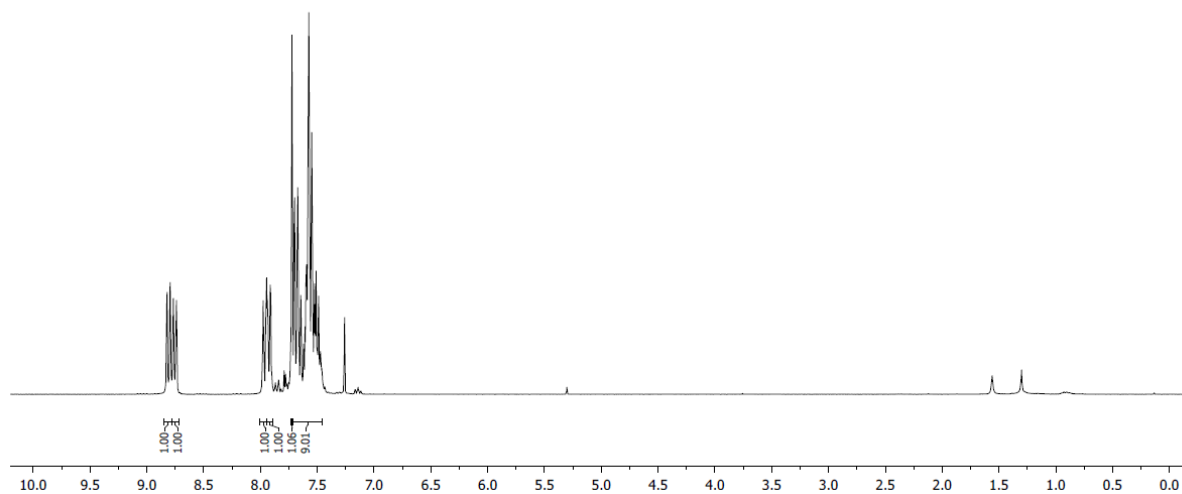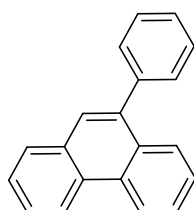

140.93  
138.90  
137.65  
131.26  
130.75  
130.19  
130.08  
128.79  
128.44  
127.66  
127.49  
127.05  
126.97  
126.71  
126.63  
126.58  
125.03  
122.66

**9-Phenylphenanthrene (8) + two regioisomers**

**<sup>13</sup>C-NMR (75 MHz, CDCl<sub>3</sub>)**

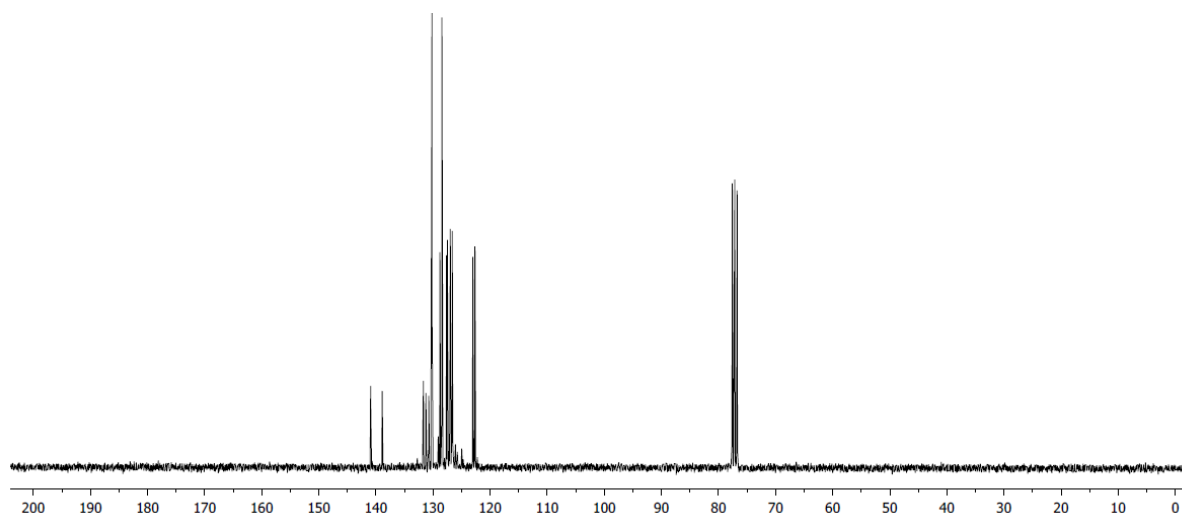

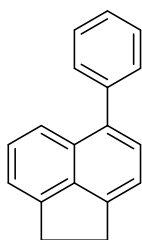

**5-Phenylacenaphthene (9a)**

**$^1\text{H-NMR}$  (300 MHz,  $\text{CDCl}_3$ )**

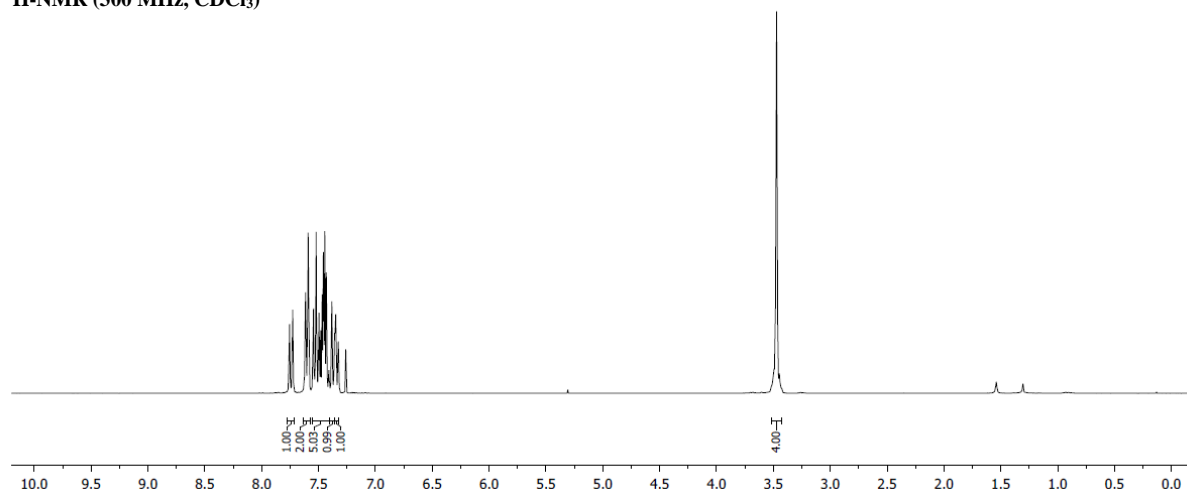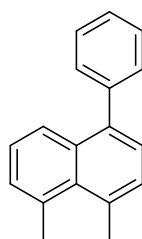

**5-Phenylacenaphthene (9a)**

**$^{13}\text{C-NMR}$  (75 MHz,  $\text{CDCl}_3$ )**

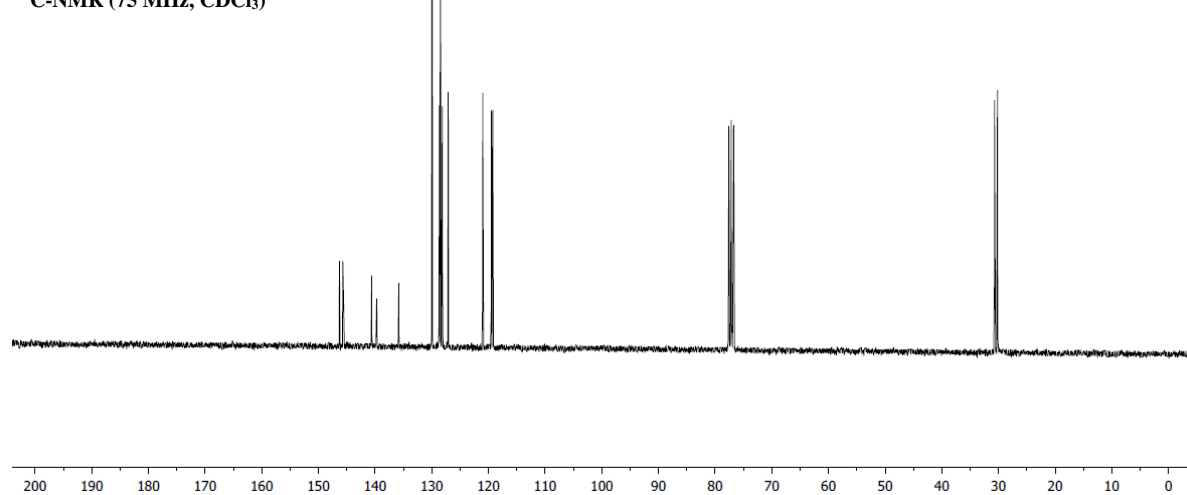

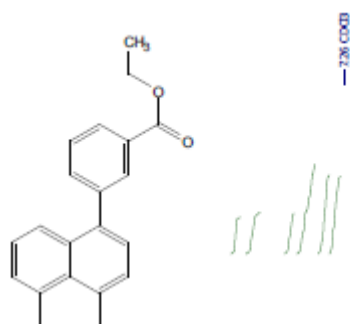

**Ethyl- 3-(1,2-dihydroacenaphthylen-5-yl)benzoate (9b)**  
 $^1\text{H}$ -NMR (300 MHz,  $\text{CDCl}_3$ )

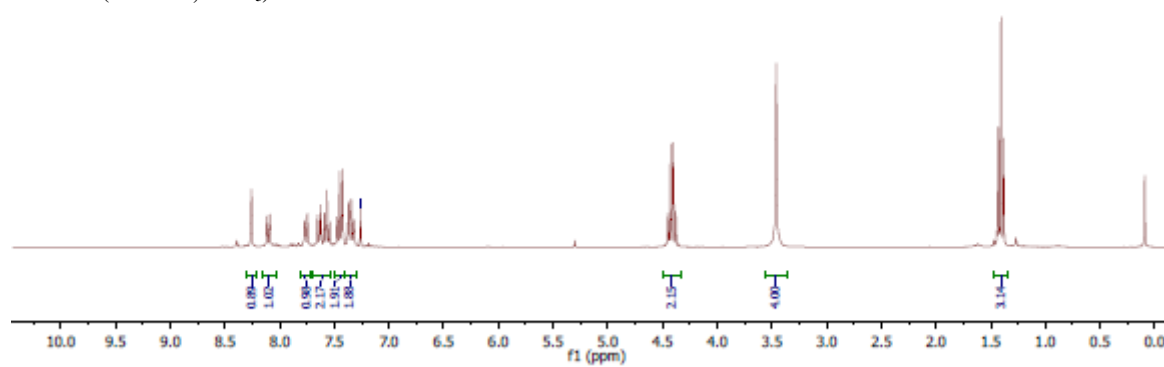

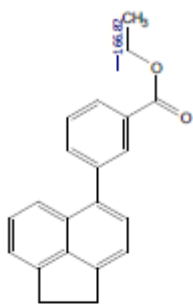

**Ethyl- 3-(1,2-dihydroacenaphthylen-5-yl)benzoate (9b)**

$^{13}\text{C}$ -NMR (75 MHz,  $\text{CDCl}_3$ )

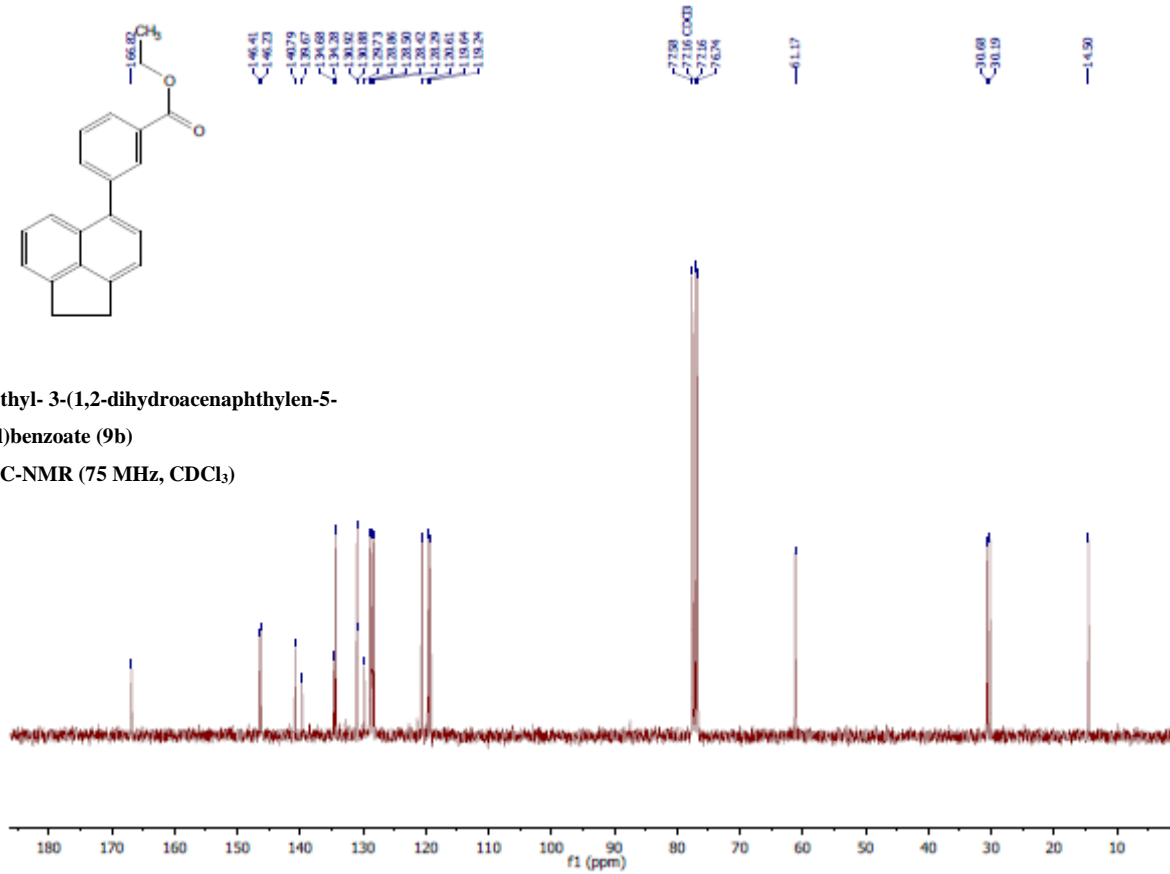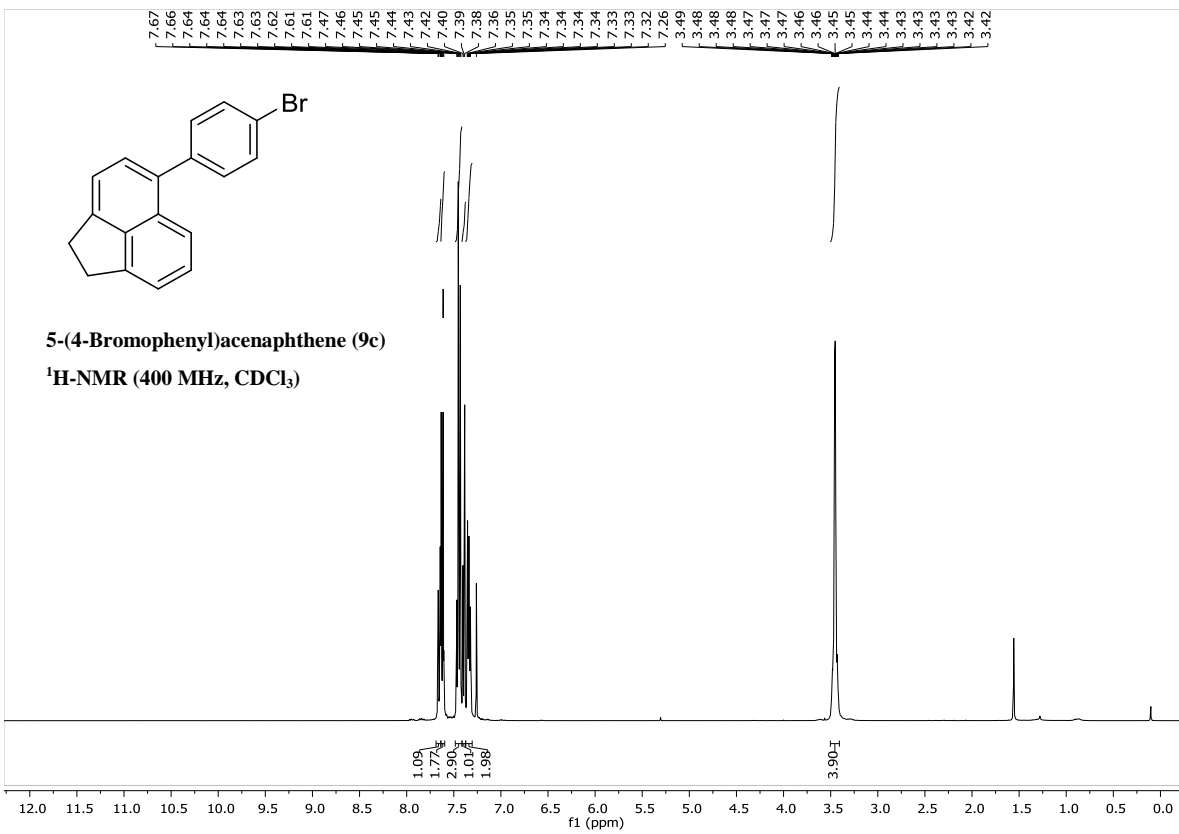



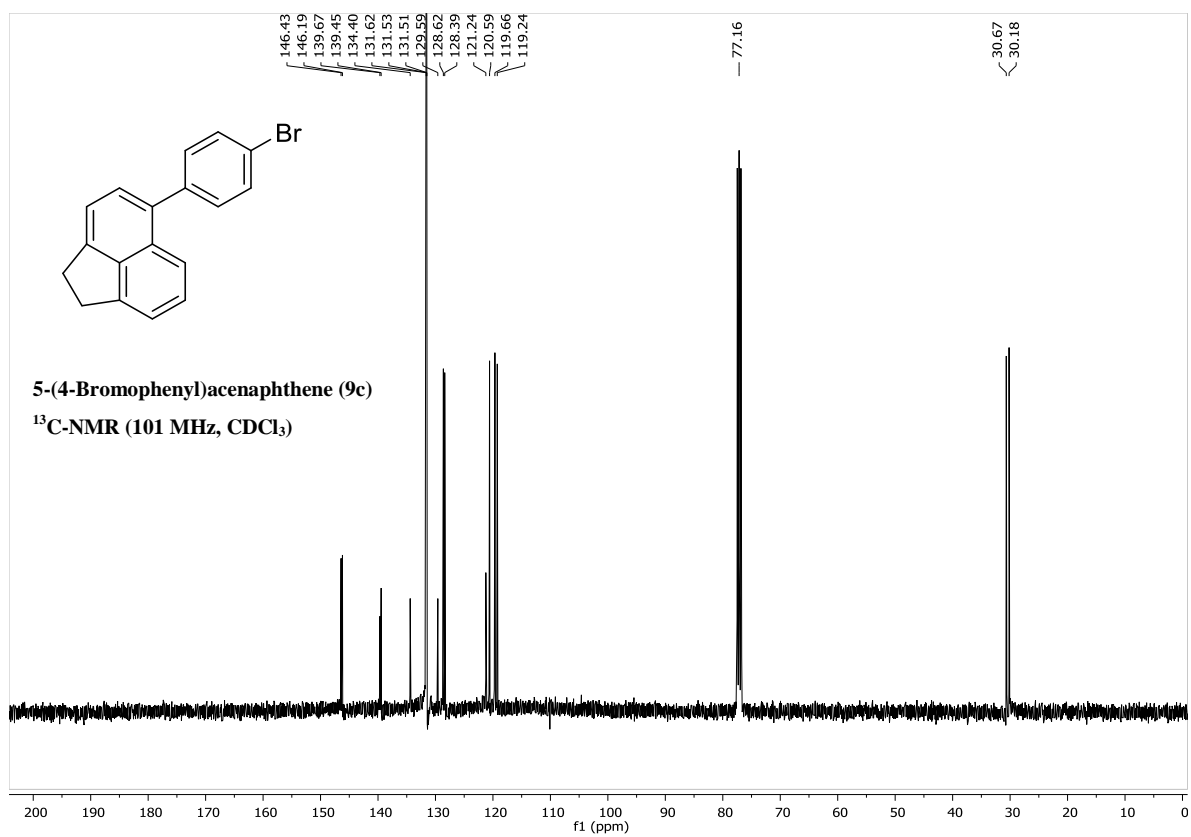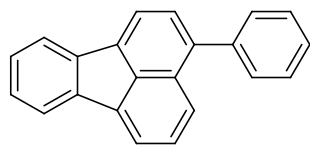

**3-Phenylfluoranthene (10a) + regioisomer**  
 $^1\text{H}$ -NMR (400 MHz,  $\text{CDCl}_3$ )

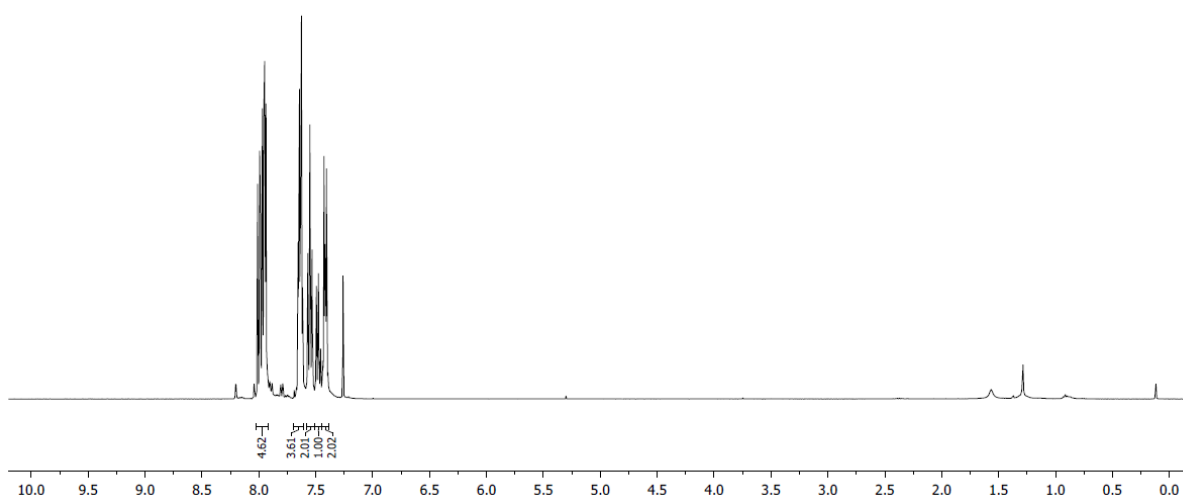

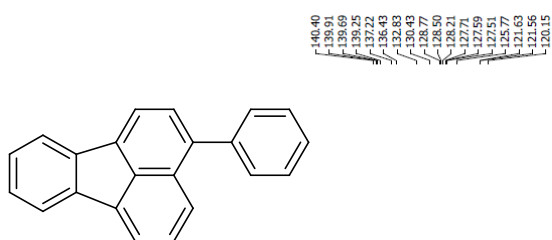

**3-Phenylfluoranthene (10a) + regioisomer**

$^{13}\text{C}$ -NMR (101 MHz,  $\text{CDCl}_3$ )

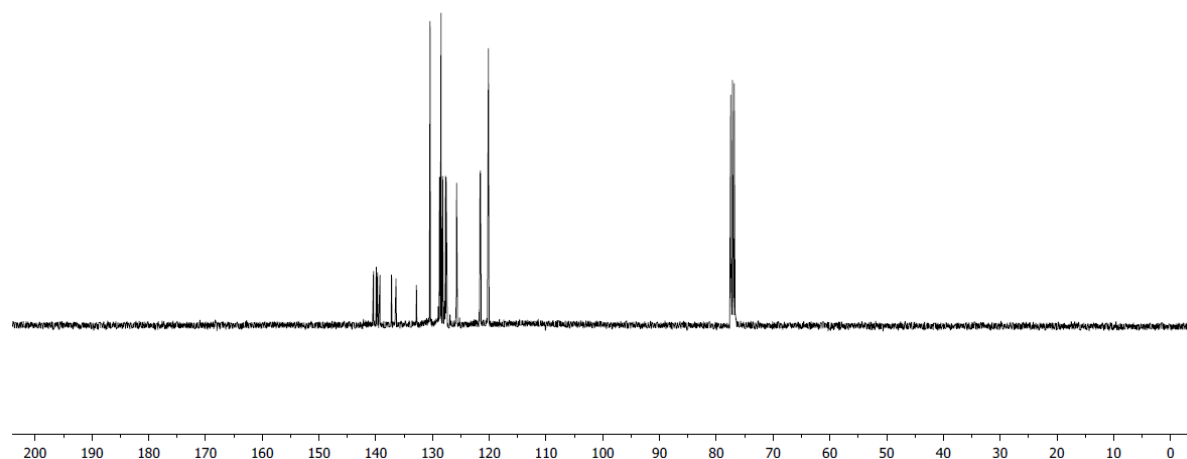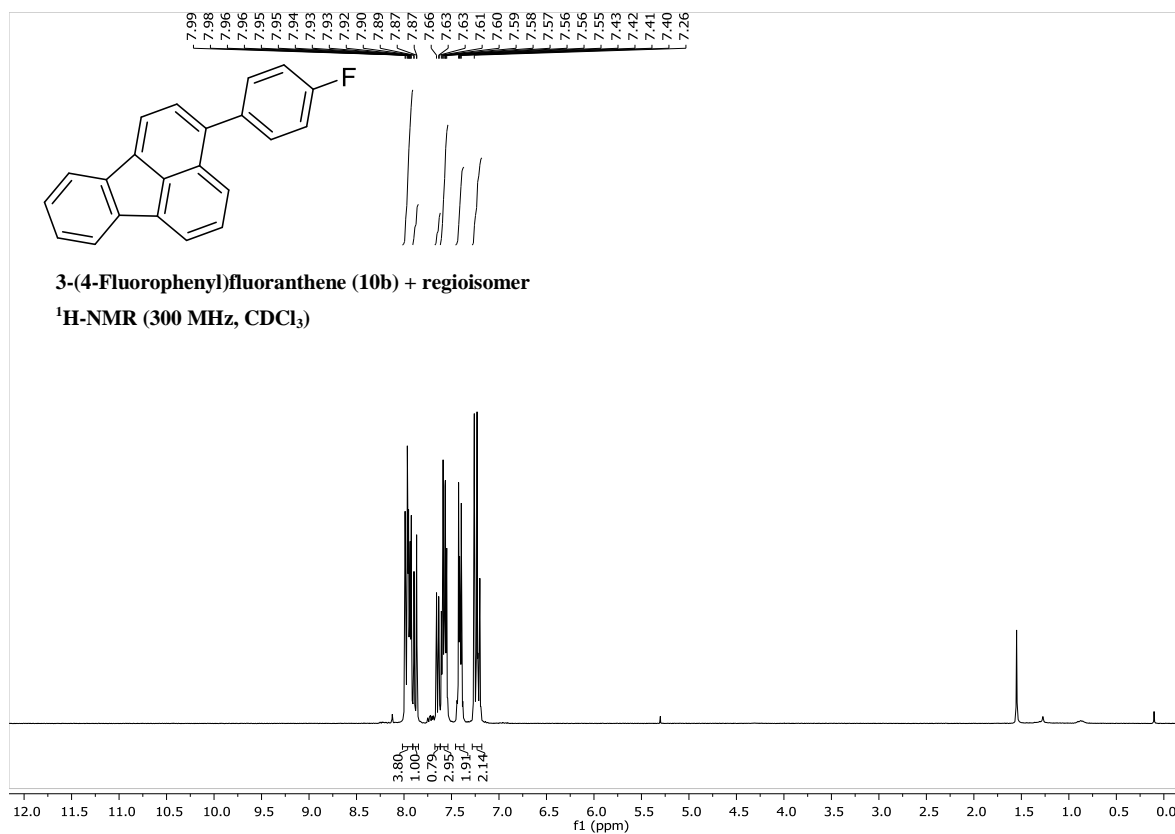

**3-(4-Fluorophenyl)fluoranthene (10b) + regioisomer**

$^1\text{H}$ -NMR (300 MHz,  $\text{CDCl}_3$ )

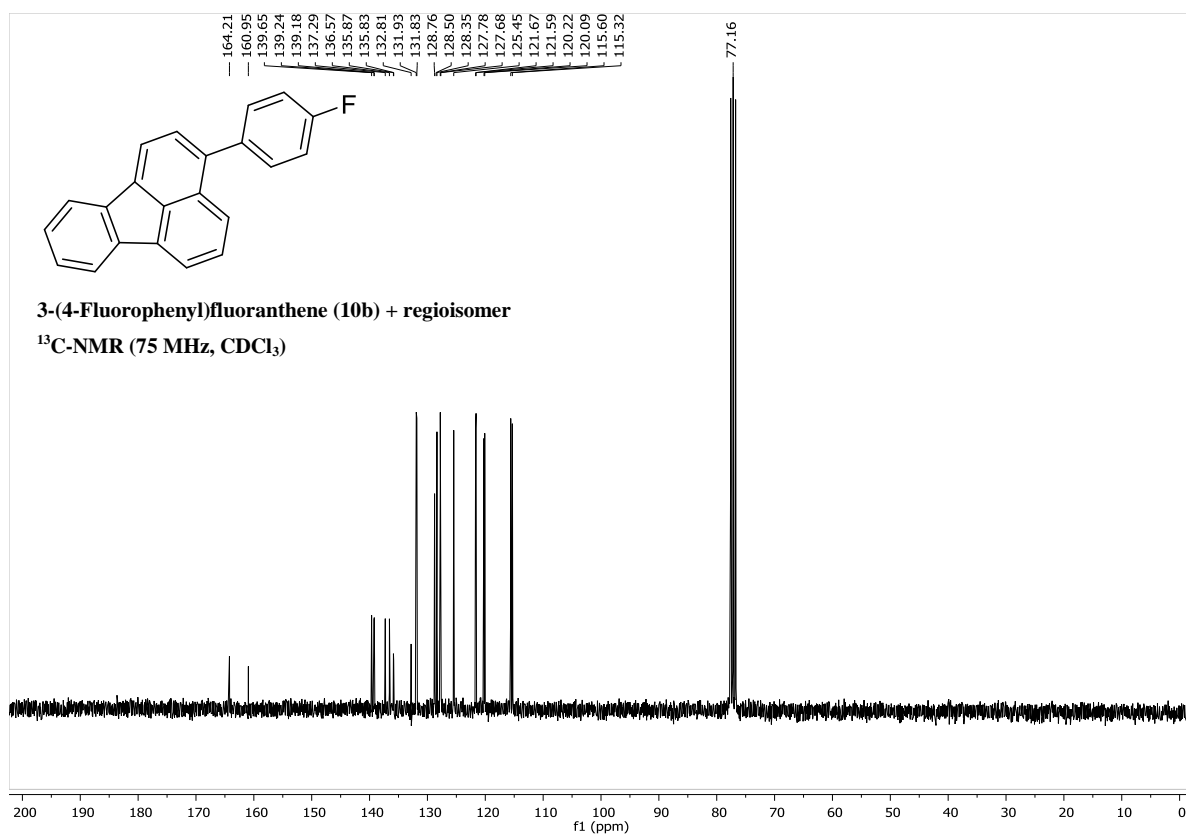

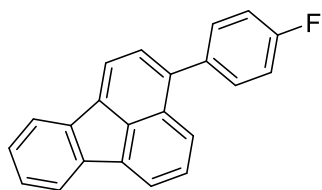

**3-(4-Fluorophenyl)fluoranthene (10b) + regioisomer**

<sup>19</sup>F-NMR (282 MHz, CDCl<sub>3</sub>)

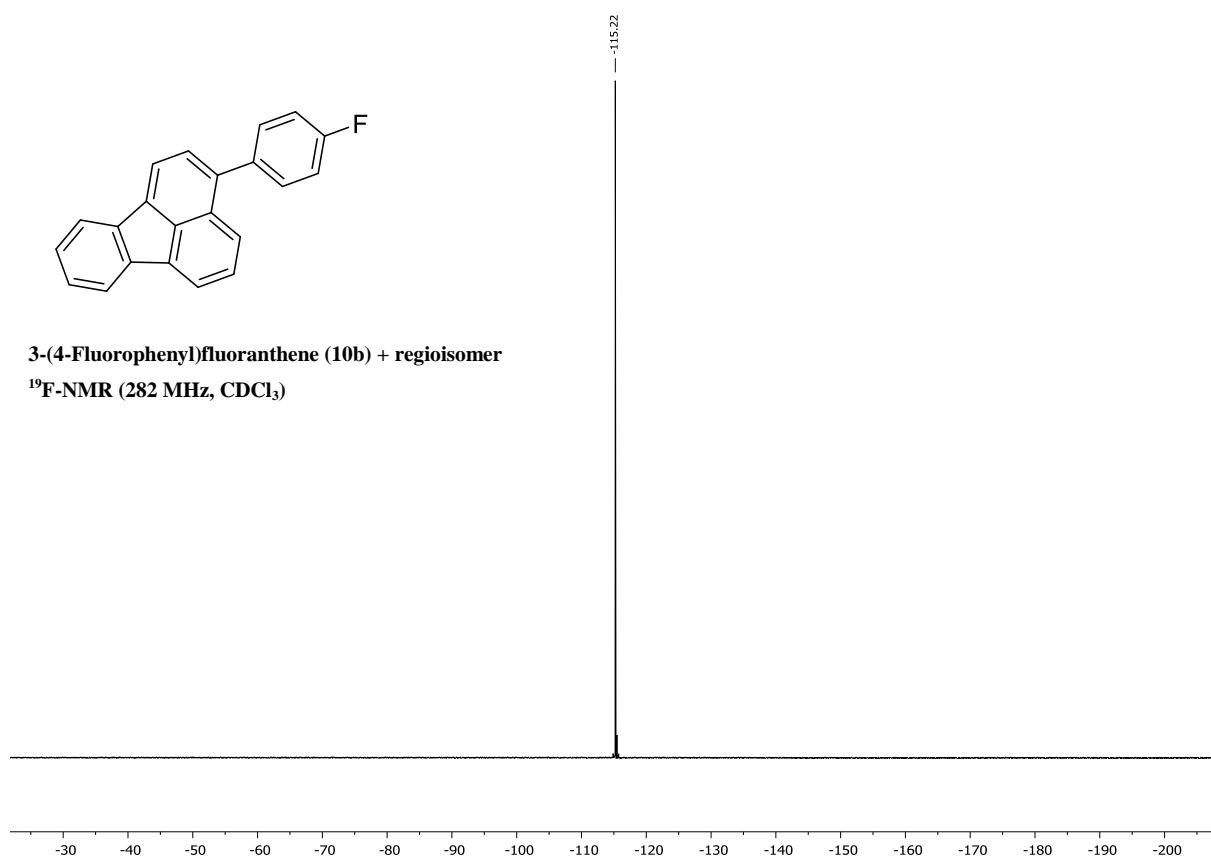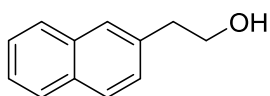

**2-(2-Naphthyl)ethan-1-ol**

<sup>1</sup>H-NMR (400 MHz, CDCl<sub>3</sub>)

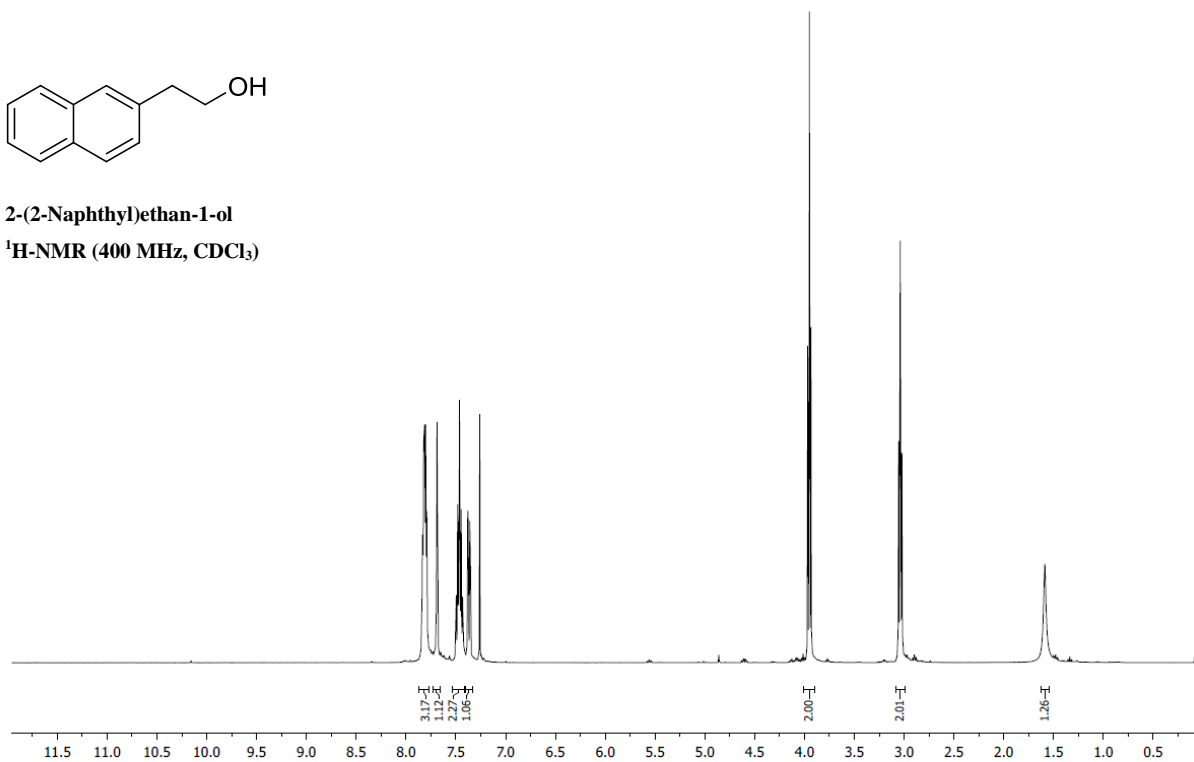

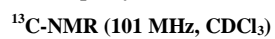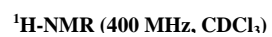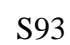

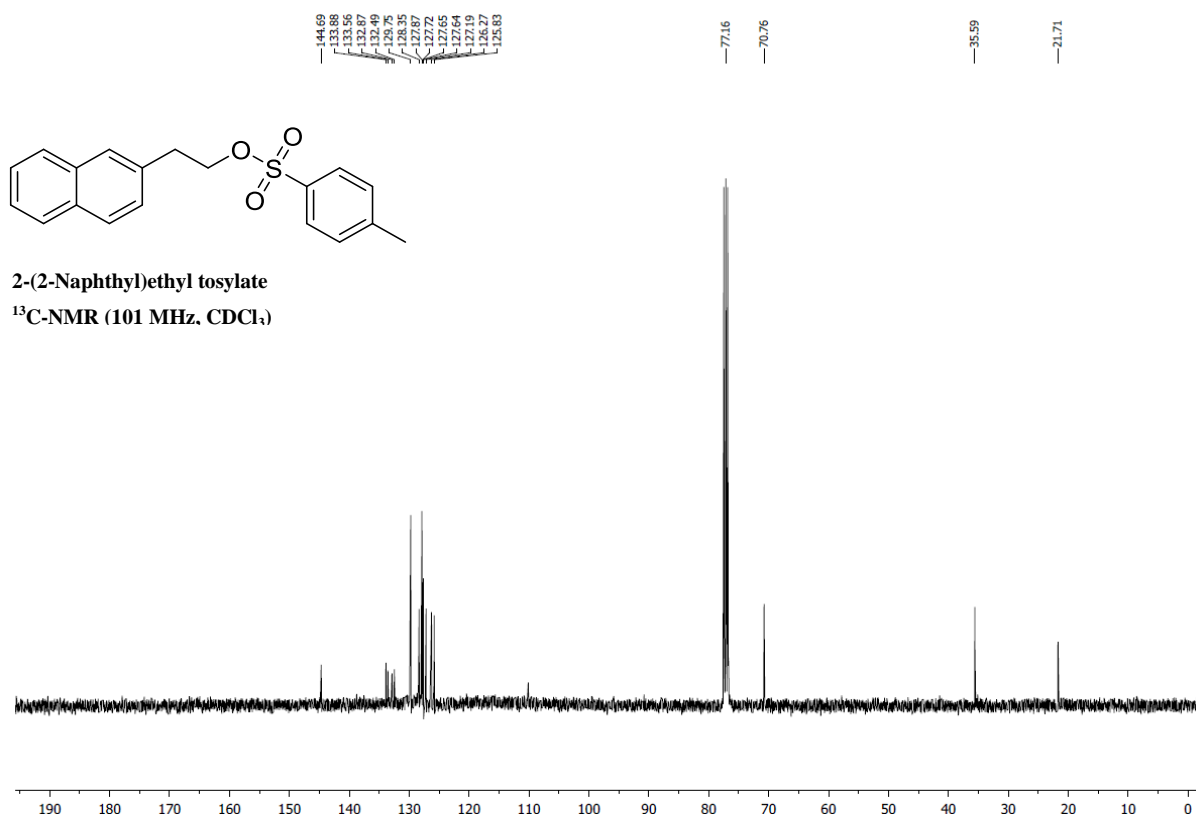

## 10. 0 References

- <sup>1</sup> M. Bielawski, D. Aili, B. Olofsson, *J. Org. Chem.* **2008**, 73, 4602.
- <sup>2</sup> A. M. Wagner, M. S. Sanford, *Org. Lett.* **2011**, 13, 288.
- <sup>3</sup> Storr, T. E.; Greaney, M. F. *Org. Lett.* **2013**, 15, 1410.
- <sup>4</sup> Kieffer, M.; Chuang, K.; Reisman, S. *Chem. Sci.*, **2012**, 3, 3170.
- <sup>5</sup> Phipps, R. J.; Grimster, N. P.; Gaunt, M. J.; *J. Am. Chem. Soc.* **2008**, 130, 8172.
- <sup>6</sup> Castro, S.; Fernández, J. J.; Vicente, R.; Fañanás, F. J.; Rodríguez, F. *Chem. Commun.* **2012**, 48, 9089.
- <sup>7</sup> Kobayashi, O.; Uraguchi, Y.; Yamakawa, T. *Org. Lett.* **2009**, 11, 2679.
- <sup>8</sup> Anbarasan, P.; Neumann, H.; Beller, M. *Chem. Asian J.* **2010**, 5, 1775.
- <sup>9</sup> Qin, C.; Lu, W. *J. Org. Chem.* **2008**, 73, 7424-7427; J. Hassan, C. Hathroubi, C. Gozzi, M. Lemaire, *Tetrahedron* **2001**, 57, 7845.
- <sup>10</sup> Iwai, T.; Tanaka, R.; Harada, T.; Sawamura, M. *Chem. Eur. J.* **2014**, 20, 1057.
- <sup>11</sup> Chung, K. H.; So, C. M.; Wong, S. M.; Luk, C. H.; Zhou, Z.; Lau, C. P.; Kwong, F. Y. *Chem. Commun.* **2012**, 48, 1967.
- <sup>12</sup> Mochida, K.; Kawasumi, K.; Segawa, Y.; Itami, K. *J. Am. Chem. Soc.* **2011**, 133, 10716.
- <sup>13</sup> Kawai, H.; Kobayashi, Y.; Oi, S. *Chem. Commun.* **2008**, 1464.
- <sup>14</sup> Sugihara, Y.; Takeda, H.; Nakayama, J. *Eur. J. Org. Chem.* **1999**, 597.
- <sup>15</sup> Kawasumi, K.; Mochida, K.; Kajino, T.; Segawa, Y.; Itami, K. *Org. Lett.* **2012**, 14, 418.
- <sup>16</sup> Morales-Serna, J. A.; García-Ríos, E.; Bernal, J.; Paleo, E.; Gaviño, R.; Cárdenas, J. *Synthesis* **2011**, 9, 1375-1382.
- <sup>17</sup> Tang, D.-T. D. Collins, K. D.; Ernst, J. B.; Glorius, F. *Angew. Chem. Int. Ed.* **2014**, 53, 1809
- <sup>18</sup> Otwinowski, Z.; Minor, W.; *Methods Enzymol.* **1997**, 276, 307.
- <sup>19</sup> Otwinowski, Z.; Borek, D.; Majewski, W.; Minor, W. *Acta Crystallogr. Sect. A* **2003**, 59, 228.
- <sup>20</sup> Sheldrick, G. M. *Acta Crystallogr. Sect. A* **1990**, 46, 467.
- <sup>21</sup> Sheldrick, G. M. *Acta Crystallogr. Sect. A* **2008**, 64, 112.

## 11.0 X-ray data

X-Ray diffraction: Data sets were collected with a Nonius KappaCCD diffractometer. Programs used: data collection, COLLECT (Nonius B.V., 1998); data reduction Denzo-SMN<sup>18</sup>; absorption correction, Denzo<sup>19</sup>; structure solution SHELXS-97<sup>20</sup>; structure refinement SHELXL-97<sup>21</sup>. R-values are given for observed reflections, and wR2 values are given for all reflections.

### 11.1 1-Phenylanthracene (6a)

CCDC 1013416

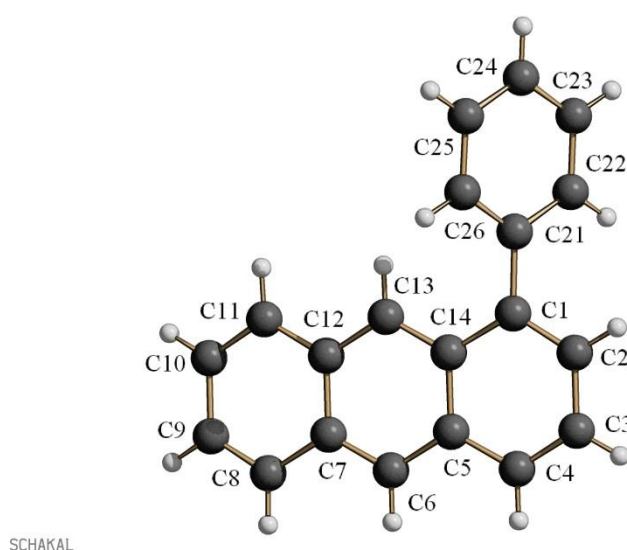

**X-ray crystal structure analysis of 1-phenylanthracene (17):** formula  $C_{20}H_{14}$ ,  $M = 254.31$ , colourless crystal,  $0.40 \times 0.25 \times 0.20$  mm,  $a = 9.6321(1)$ ,  $b = 11.0943(1)$ ,  $c = 14.7022(1)$  Å,  $\alpha = 67.862(1)$ ,  $\beta = 79.883(1)$ ,  $\gamma = 69.219(1)^\circ$ ,  $V = 1359.0(1)$  Å<sup>3</sup>,  $\rho_{\text{calc}} = 1.243$  gcm<sup>-3</sup>,  $\mu = 0.532$  mm<sup>-1</sup>, empirical absorption correction ( $0.815 \leq T \leq 0.901$ ),  $Z = 4$ , triclinic, space group  $P\bar{1}$  (No. 2),  $\lambda = 1.54178$  Å,  $T = 223(2)$  K,  $\omega$  and  $\phi$  scans, 15068 reflections collected ( $\pm h, \pm k, \pm l$ ),  $[(\sin\theta)/\lambda] = 0.60$  Å<sup>-1</sup>, 4558 independent ( $R_{\text{int}} = 0.029$ ) and 4312 observed reflections [ $I > 2\sigma(I)$ ], 361 refined parameters,  $R = 0.038$ ,  $wR^2 = 0.102$ , max. (min.) residual electron density 0.13 (-0.11) e.Å<sup>-3</sup>, hydrogen atoms calculated and refined as riding atoms.



## 11.2 1-Phenyltriphenylene (5a)

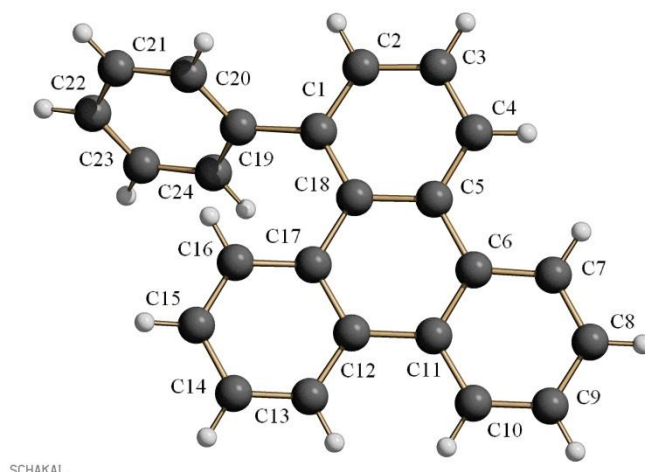

CCDC 1013417

**X-ray crystal structure analysis of 1-phenyltriphenylene (20):** formula  $C_{24}H_{16}$ ,  $M = 304.37$ , colourless crystal,  $0.17 \times 0.07 \times 0.02$  mm,  $a = 19.1157(9)$ ,  $b = 5.7556(3)$ ,  $c = 29.6669(1)$  Å,  $\beta = 108.002(3)^\circ$ ,  $V = 3104.2(2)$  Å<sup>3</sup>,  $\rho_{\text{calc}} = 1.303$  gcm<sup>-3</sup>,  $\mu = 0.559$  mm<sup>-1</sup>, empirical absorption correction ( $0.911 \leq T \leq 0.988$ ),  $Z = 8$ , monoclinic, space group  $P2_1/c$  (No. 14),  $\lambda = 1.54178$  Å,  $T = 223(2)$  K,  $\omega$  and  $\phi$  scans, 38915 reflections collected ( $\pm h$ ,  $\pm k$ ,  $\pm l$ ),  $[(\sin\theta)/\lambda] = 0.60$  Å<sup>-1</sup>, 5320 independent ( $R_{\text{int}} = 0.093$ ) and 3678 observed reflections [ $I > 2\sigma(I)$ ], 434 refined parameters,  $R = 0.049$ ,  $wR^2 = 0.144$ , max. (min.) residual electron density 0.17 (-0.17) e.Å<sup>-3</sup>, hydrogen atoms calculated and refined as riding atoms.
